# Supplementary material for: Metabolic labeling of secreted matrix to investigate cell–material interactions in tissue engineering and mechanobiology
Source: Springer Nature journal article supplement (doi:10.1038/s41596-021-00652-9), 2022-02-09
Supplement: MOESM3 [file 41596_2021_652_MOESM3_ESM20.xlsx]

## Sheet: Summary
			Tab Name	Description
			Summary	Contains descriptions of each tab in spreadsheet
			proteinGroups	Original 'proteinGroups' data generated by MaxQuant
			Filtered Proteins	Filtered protein IDs and intensities used for downstream data analysis
			Data Analyses	ECM proteins identified with fold change calculations and annotations
			MaxQuant Parameters	List of MaxQuant parameters for this experiment

## Sheet: proteinGroups
Protein IDs	Lead Protein ID	Lead Gene Name	Cellular Compartment	Matrisome Classification	Majority protein IDs	Peptide counts (all)	Peptide counts (razor+unique)	Peptide counts (unique)	Fasta headers	Number of proteins	Peptides	Razor + unique peptides	Unique peptides	Peptides Aha1	Peptides Aha2	Peptides Aha3	Peptides Met1	Peptides Met2	Peptides Met3	Razor + unique peptides Aha1	Razor + unique peptides Aha2	Razor + unique peptides Aha3	Razor + unique peptides Met1	Razor + unique peptides Met2	Razor + unique peptides Met3	Unique peptides Aha1	Unique peptides Aha2	Unique peptides Aha3	Unique peptides Met1	Unique peptides Met2	Unique peptides Met3	Sequence coverage [%]	Unique + razor sequence coverage [%]	Unique sequence coverage [%]	Mol. weight [kDa]	Sequence length	Sequence lengths	Fraction average	Fraction 1	Fraction 4	Q-value	Score	Identification type Aha1	Identification type Aha2	Identification type Aha3	Identification type Met1	Identification type Met2	Identification type Met3	Sequence coverage Aha1 [%]
A0A3Q1MDK7;A4IFU5;A0A096LNF2;A0A3Q1MF62;A0A3Q1N7K2;F1MRN2;P0C0S9;F2Z4J1;E1BH22;A0A0A0MP90;F2Z4G5;Q3ZBX9;A1A4R1;A0A3Q1N0B0;A0A0A0MP93;F1MLQ1;Q32LA7;P0C0S4;F2Z4I6;A0A3Q1M178;A0A3Q1M0K4	A0A3Q1MDK7	H2AC10	Cytosolic	0	A0A3Q1MDK7;A4IFU5;A0A096LNF2;A0A3Q1MF62;A0A3Q1N7K2;F1MRN2;P0C0S9;F2Z4J1;E1BH22;A0A0A0MP90;F2Z4G5;Q3ZBX9;A1A4R1;A0A3Q1N0B0;A0A0A0MP93;F1MLQ1;Q32LA7;P0C0S4	3;3;3;3;3;3;3;3;3;3;3;3;3;2;2;2;2;2;1;1;1	3;3;3;3;3;3;3;3;3;3;3;3;3;2;2;2;2;2;1;1;1	3;3;3;3;3;3;3;3;3;3;3;3;3;2;2;2;2;2;1;1;1	tr|A0A3Q1MDK7|A0A3Q1MDK7_BOVIN Histone H2A OS=Bos taurus OX=9913 GN=H2AC10 PE=3 SV=1;tr|A4IFU5|A4IFU5_BOVIN Histone H2A OS=Bos taurus OX=9913 GN=H2AW PE=2 SV=1;tr|A0A096LNF2|A0A096LNF2_BOVIN Histone H2A OS=Bos taurus OX=9913 GN=H2AC19 PE=3 SV=1;tr|A0A3Q1MF	21	3	3	3	2	3	1	3	3	0	2	3	1	3	3	0	2	3	1	3	3	0	24.1	24.1	24.1	15.519	145	145;130;143;140;140;136;130;130;130;130;130;129;129;119;130;130;128;128;130;136;84	2.5	6	6	0	36.891	By MS/MS	By MS/MS	By MS/MS	By MS/MS	By MS/MS		17.9
A0A140T831;A6QPZ0;P35478	A0A140T831	CSTB	Matrisome Associated	ECM Regulators	A0A140T831;A6QPZ0;P35478	4;3;2	1;1;0	1;1;0	tr|A0A140T831|A0A140T831_BOVIN Cystatin-B OS=Bos taurus OX=9913 GN=CSTB PE=3 SV=2;tr|A6QPZ0|A6QPZ0_BOVIN CSTB protein OS=Bos taurus OX=9913 GN=CSTB PE=2 SV=1;sp|P35478|CYTX_BOVIN Stefin-C OS=Bos taurus OX=9913 PE=1 SV=1	3	4	1	1	3	3	3	3	4	0	0	0	0	1	1	0	0	0	0	1	1	0	33.6	6	6	16.395	149	149;101;101	4		2	0.0053476	6.2948	By matching	By matching	By matching	By MS/MS	By MS/MS		27.5
A0A3Q1LXP4;P17690;CON__P17690;A0A140T843	A0A3Q1LXP4	APOH	Cytosolic	0	A0A3Q1LXP4;P17690;CON__P17690;A0A140T843	5;5;5;5	5;5;5;5	5;5;5;5	tr|A0A3Q1LXP4|A0A3Q1LXP4_BOVIN Apolipoprotein H OS=Bos taurus OX=9913 GN=APOH PE=4 SV=1;sp|P17690|APOH_BOVIN Beta-2-glycoprotein 1 OS=Bos taurus OX=9913 GN=APOH PE=1 SV=4;;tr|A0A140T843|A0A140T843_BOVIN Apolipoprotein H OS=Bos taurus OX=9913 GN=APOH PE=4 S	4	5	5	5	5	4	3	2	3	2	5	4	3	2	3	2	5	4	3	2	3	2	18	18	18	37.438	339	339;345;345;345	2.29	12	9	0	40.173	By MS/MS	By MS/MS	By MS/MS	By MS/MS	By MS/MS	By MS/MS	18
E1BGC0;Q28035;A0A140T854;E1BKD8;A0A3Q1MEC8	E1BGC0	0	Cytosolic	0	E1BGC0;Q28035;A0A140T854;E1BKD8;A0A3Q1MEC8	1;1;1;1;1	1;1;1;1;1	1;1;1;1;1	tr|E1BGC0|E1BGC0_BOVIN Glutathione transferase OS=Bos taurus OX=9913 PE=3 SV=2;sp|Q28035|GSTA1_BOVIN Glutathione S-transferase A1 OS=Bos taurus OX=9913 GN=GSTA1 PE=2 SV=3;tr|A0A140T854|A0A140T854_BOVIN Glutathione S-transferase OS=Bos taurus OX=9913 GN=GST	5	1	1	1	1	1	1	0	0	0	1	1	1	0	0	0	1	1	1	0	0	0	5.1	5.1	5.1	24.47	215	215;222;222;224;291	1	3		0	20.555	By MS/MS	By MS/MS	By MS/MS				5.1
A0A3Q1MCV5;Q27954;A0A140T856	A0A3Q1MCV5	COPA	Membrane	0	A0A3Q1MCV5;Q27954;A0A140T856	1;1;1	1;1;1	1;1;1	tr|A0A3Q1MCV5|A0A3Q1MCV5_BOVIN Coatomer subunit alpha OS=Bos taurus OX=9913 GN=COPA PE=4 SV=1;sp|Q27954|COPA_BOVIN Coatomer subunit alpha OS=Bos taurus OX=9913 GN=COPA PE=1 SV=1;tr|A0A140T856|A0A140T856_BOVIN Coatomer subunit alpha OS=Bos taurus OX=9913 GN	3	1	1	1	1	1	1	0	0	0	1	1	1	0	0	0	1	1	1	0	0	0	0.7	0.7	0.7	138.28	1223	1223;1224;1224	1	3		0.0027933	6.393	By MS/MS	By matching	By matching				0.7
Q58DC0;A0A140T860;A0A3Q1MPJ7	Q58DC0	CPPED1 CSTP1	Cytosolic	0	Q58DC0;A0A140T860;A0A3Q1MPJ7	2;2;2	2;2;2	2;2;2	sp|Q58DC0|CPPED_BOVIN Serine/threonine-protein phosphatase CPPED1 OS=Bos taurus OX=9913 GN=CPPED1 PE=2 SV=1;tr|A0A140T860|A0A140T860_BOVIN Serine/threonine-protein phosphatase CPPED1 OS=Bos taurus OX=9913 GN=CPPED1 PE=4 SV=1;tr|A0A3Q1MPJ7|A0A3Q1MPJ7_BOVIN	3	2	2	2	1	1	0	1	2	0	1	1	0	1	2	0	1	1	0	1	2	0	13.4	13.4	13.4	35.409	313	313;313;351	2.8	2	3	0	15.076	By MS/MS	By MS/MS		By MS/MS	By MS/MS		9.9
Q5EAD2;A0A140T866	Q5EAD2	PHGDH	Cytosolic	0	Q5EAD2;A0A140T866	1;1	1;1	1;1	sp|Q5EAD2|SERA_BOVIN D-3-phosphoglycerate dehydrogenase OS=Bos taurus OX=9913 GN=PHGDH PE=2 SV=3;tr|A0A140T866|A0A140T866_BOVIN D-3-phosphoglycerate dehydrogenase OS=Bos taurus OX=9913 GN=PHGDH PE=1 SV=1	2	1	1	1	1	1	0	0	1	0	1	1	0	0	1	0	1	1	0	0	1	0	2.8	2.8	2.8	56.451	533	533;533	2	2	1	0	6.6737	By MS/MS	By MS/MS			By MS/MS		2.8
A0A140T897;P02769;CON__P02769;A0A3Q1LNN7	A0A140T897	ALB	Cytosolic	0	A0A140T897;P02769;CON__P02769;A0A3Q1LNN7	68;66;66;64	68;66;66;64	63;61;61;59	tr|A0A140T897|A0A140T897_BOVIN Albumin OS=Bos taurus OX=9913 GN=ALB PE=4 SV=1;sp|P02769|ALBU_BOVIN Albumin OS=Bos taurus OX=9913 GN=ALB PE=1 SV=4;;tr|A0A3Q1LNN7|A0A3Q1LNN7_BOVIN Albumin OS=Bos taurus OX=9913 GN=ALB PE=4 SV=1	4	68	68	63	55	52	57	57	56	48	55	52	57	57	56	48	51	48	52	52	52	44	87	87	81.4	69.323	607	607;607;607;576	2.44	504	466	0	323.31	By MS/MS	By MS/MS	By MS/MS	By MS/MS	By MS/MS	By MS/MS	78.6
F1MNV5;P01045;CON__P01045-1;P01044;CON__Q2KJ62;CON__P01044-1;A0A140T8C8	F1MNV5	KNG1	Matrisome Associated	ECM Regulators	F1MNV5;P01045;CON__P01045-1;P01044;CON__Q2KJ62;CON__P01044-1;A0A140T8C8	2;2;2;2;2;2;2	2;2;2;2;2;2;2	2;2;2;2;2;2;2	tr|F1MNV5|F1MNV5_BOVIN Kininogen-1 OS=Bos taurus OX=9913 GN=KNG1 PE=4 SV=2;sp|P01045|KNG2_BOVIN Kininogen-2 OS=Bos taurus OX=9913 GN=KNG2 PE=1 SV=1;;sp|P01044|KNG1_BOVIN Kininogen-1 OS=Bos taurus OX=9913 GN=KNG1 PE=1 SV=1;;;tr|A0A140T8C8|A0A140T8C8_BOVIN B	7	2	2	2	2	1	1	2	2	1	2	1	1	2	2	1	2	1	1	2	2	1	4.6	4.6	4.6	48.421	436	436;619;619;621;621;621;621	2.67	4	5	0	43.063	By MS/MS	By MS/MS	By MS/MS	By MS/MS	By MS/MS	By matching	4.6
P53712;A0A452DIS2;A0A140T8D2	P53712	ITGB1	Membrane	0	P53712;A0A452DIS2;A0A140T8D2	2;2;2	2;2;2	2;2;2	sp|P53712|ITB1_BOVIN Integrin beta-1 OS=Bos taurus OX=9913 GN=ITGB1 PE=1 SV=3;tr|A0A452DIS2|A0A452DIS2_BOVIN Integrin beta OS=Bos taurus OX=9913 GN=ITGB1 PE=3 SV=1;tr|A0A140T8D2|A0A140T8D2_BOVIN Integrin beta OS=Bos taurus OX=9913 GN=ITGB1 PE=3 SV=2	3	2	2	2	1	1	1	2	2	0	1	1	1	2	2	0	1	1	1	2	2	0	3.6	3.6	3.6	88.093	798	798;799;802	2.71	3	4	0	33.824	By MS/MS	By MS/MS	By matching	By MS/MS	By MS/MS		2.4
A0A3Q1MKE4;A0A3Q1LFL0;A0A3Q1LPU4	A0A3Q1MKE4	PHACTR1	Nuclear	0	A0A3Q1MKE4;A0A3Q1LFL0;A0A3Q1LPU4	1;1;1	1;1;1	1;1;1	tr|A0A3Q1MKE4|A0A3Q1MKE4_BOVIN Phosphatase and actin regulator OS=Bos taurus OX=9913 GN=PHACTR1 PE=3 SV=1;tr|A0A3Q1LFL0|A0A3Q1LFL0_BOVIN Phosphatase and actin regulator OS=Bos taurus OX=9913 GN=PHACTR1 PE=3 SV=1;tr|A0A3Q1LPU4|A0A3Q1LPU4_BOVIN Phosphatase a	3	1	1	1	0	0	0	0	0	1	0	0	0	0	0	1	0	0	0	0	0	1	2.9	2.9	2.9	58.259	524	524;558;609	4		1	1	-2						By MS/MS	0
A7YWC6;A0A3Q1LGJ2;A0A3Q1LUN2;A0A3Q1MMQ9	A7YWC6	SUB1	Nuclear	0	A7YWC6;A0A3Q1LGJ2;A0A3Q1LUN2;A0A3Q1MMQ9	1;1;1;1	1;1;1;1	1;1;1;1	tr|A7YWC6|A7YWC6_BOVIN Activated RNA polymerase II transcriptional coactivator p15 OS=Bos taurus OX=9913 GN=SUB1 PE=1 SV=1;tr|A0A3Q1LGJ2|A0A3Q1LGJ2_BOVIN Activated RNA polymerase II transcriptional coactivator p15 OS=Bos taurus OX=9913 GN=SUB1 PE=1 SV=1;tr	4	1	1	1	1	1	1	1	1	0	1	1	1	1	1	0	1	1	1	1	1	0	8.7	8.7	8.7	14.369	127	127;132;137;167	2.2	3	2	0.0028653	6.4637	By MS/MS	By MS/MS	By MS/MS	By MS/MS	By MS/MS		8.7
A0A3Q1M2A8;A0A3Q1LGM4;A0A3Q1N461;A0A3Q1MIF4;F1N4M7;CON__Q32PI4;A0A3Q1MF14	A0A3Q1M2A8	CFI	Nuclear	0	A0A3Q1M2A8;A0A3Q1LGM4;A0A3Q1N461;A0A3Q1MIF4;F1N4M7;CON__Q32PI4;A0A3Q1MF14	1;1;1;1;1;1;1	1;1;1;1;1;1;1	1;1;1;1;1;1;1	tr|A0A3Q1M2A8|A0A3Q1M2A8_BOVIN Complement factor I OS=Bos taurus OX=9913 GN=CFI PE=1 SV=1;tr|A0A3Q1LGM4|A0A3Q1LGM4_BOVIN Complement factor I OS=Bos taurus OX=9913 GN=CFI PE=1 SV=1;tr|A0A3Q1N461|A0A3Q1N461_BOVIN Complement factor I OS=Bos taurus OX=9913 GN=	7	1	1	1	1	1	0	0	0	0	1	1	0	0	0	0	1	1	0	0	0	0	3.3	3.3	3.3	64.922	581	581;583;594;602;610;618;618	1	2		0.0028571	6.4415	By MS/MS	By matching					3.3
A0A3Q1LKN6;F1N506;A0A3Q1LHC9	A0A3Q1LKN6	MCM2	Cytoskeletal	0	A0A3Q1LKN6;F1N506;A0A3Q1LHC9	1;1;1	1;1;1	1;1;1	tr|A0A3Q1LKN6|A0A3Q1LKN6_BOVIN DNA replication licensing factor MCM2 OS=Bos taurus OX=9913 GN=MCM2 PE=1 SV=1;tr|F1N506|F1N506_BOVIN DNA replication licensing factor MCM2 OS=Bos taurus OX=9913 GN=MCM2 PE=1 SV=3;tr|A0A3Q1LHC9|A0A3Q1LHC9_BOVIN DNA replication	3	1	1	1	0	0	0	0	0	1	0	0	0	0	0	1	0	0	0	0	0	1	0.8	0.8	0.8	100.97	900	900;902;929	4		1	1	-2						By MS/MS	0
A0A3Q1M063;E1BNH8;A0A3Q1LHD2	A0A3Q1M063	PBRM1	Nuclear	0	A0A3Q1M063;E1BNH8;A0A3Q1LHD2	1;1;1	1;1;1	1;1;1	tr|A0A3Q1M063|A0A3Q1M063_BOVIN Polybromo 1 OS=Bos taurus OX=9913 GN=PBRM1 PE=4 SV=1;tr|E1BNH8|E1BNH8_BOVIN Polybromo 1 OS=Bos taurus OX=9913 GN=PBRM1 PE=4 SV=3;tr|A0A3Q1LHD2|A0A3Q1LHD2_BOVIN Polybromo 1 OS=Bos taurus OX=9913 GN=PBRM1 PE=4 SV=1	3	1	1	1	1	1	0	1	1	0	1	1	0	1	1	0	1	1	0	1	1	0	0.5	0.5	0.5	181.84	1581	1581;1688;1703	2.5	2	2	0.0051546	6.2139	By MS/MS	By MS/MS		By MS/MS	By MS/MS		0.5
A0A3Q1LHT7;F1MDC1	A0A3Q1LHT7	RRBP1	Membrane	0	A0A3Q1LHT7;F1MDC1	4;2	4;2	4;2	tr|A0A3Q1LHT7|A0A3Q1LHT7_BOVIN Ribosome binding protein 1 OS=Bos taurus OX=9913 GN=RRBP1 PE=1 SV=1;tr|F1MDC1|F1MDC1_BOVIN Ribosome binding protein 1 OS=Bos taurus OX=9913 GN=RRBP1 PE=1 SV=3	2	4	4	4	2	2	2	3	2	0	2	2	2	3	2	0	2	2	2	3	2	0	2.8	2.8	2.8	166.77	1551	1551;1559	2.36	6	5	0	33.676	By MS/MS	By MS/MS	By MS/MS	By MS/MS	By MS/MS		1.6
A0A3Q1LLB2;A0A3Q1M6S3;G3N2N7;A0A3Q1LI46;F1MD74;A0A3Q1LT32;F1N161;F1MR96;A0A3Q1MZC5	A0A3Q1LLB2	CAST	Nuclear	0	A0A3Q1LLB2;A0A3Q1M6S3;G3N2N7;A0A3Q1LI46;F1MD74;A0A3Q1LT32;F1N161;F1MR96;A0A3Q1MZC5	1;1;1;1;1;1;1;1;1	1;1;1;1;1;1;1;1;1	1;1;1;1;1;1;1;1;1	tr|A0A3Q1LLB2|A0A3Q1LLB2_BOVIN Calpain inhibitor OS=Bos taurus OX=9913 GN=CAST PE=1 SV=1;tr|A0A3Q1M6S3|A0A3Q1M6S3_BOVIN Calpain inhibitor OS=Bos taurus OX=9913 GN=CAST PE=1 SV=1;tr|G3N2N7|G3N2N7_BOVIN Calpain inhibitor OS=Bos taurus OX=9913 GN=CAST PE=1 SV	9	1	1	1	0	0	0	1	1	0	0	0	0	1	1	0	0	0	0	1	1	0	2.5	2.5	2.5	77.07	718	718;749;754;777;781;783;786;797;799	4		2	0.0027855	6.3914				By matching	By MS/MS		0
A0A3Q1M299;A0A3Q1M849;F1MPE1;A0A3Q1LTK9;A0A3Q1M6A2;A0A3Q1N1N6;A0A3Q1LI93	A0A3Q1M299	CD109	Matrisome Associated	ECM Regulators	A0A3Q1M299;A0A3Q1M849;F1MPE1;A0A3Q1LTK9;A0A3Q1M6A2;A0A3Q1N1N6;A0A3Q1LI93	4;4;4;4;4;4;4	4;4;4;4;4;4;4	4;4;4;4;4;4;4	tr|A0A3Q1M299|A0A3Q1M299_BOVIN CD109 molecule OS=Bos taurus OX=9913 GN=CD109 PE=3 SV=1;tr|A0A3Q1M849|A0A3Q1M849_BOVIN CD109 molecule OS=Bos taurus OX=9913 GN=CD109 PE=3 SV=1;tr|F1MPE1|F1MPE1_BOVIN CD109 molecule OS=Bos taurus OX=9913 GN=CD109 PE=3 SV=3;tr|	7	4	4	4	3	3	3	4	4	0	3	3	3	4	4	0	3	3	3	4	4	0	4.1	4.1	4.1	155.52	1391	1391;1411;1441;1449;1450;1451;1455	2.33	10	8	0	30.907	By MS/MS	By MS/MS	By MS/MS	By MS/MS	By MS/MS		3.3
A0A3Q1MMA2;A0A3Q1M686;A0A3Q1LIN6;A0A3Q1M6E7;F1N5F4	A0A3Q1MMA2	DAB1	Membrane	0	A0A3Q1MMA2;A0A3Q1M686;A0A3Q1LIN6;A0A3Q1M6E7;F1N5F4	1;1;1;1;1	1;1;1;1;1	1;1;1;1;1	tr|A0A3Q1MMA2|A0A3Q1MMA2_BOVIN DAB adaptor protein 1 OS=Bos taurus OX=9913 GN=DAB1 PE=4 SV=1;tr|A0A3Q1M686|A0A3Q1M686_BOVIN DAB adaptor protein 1 OS=Bos taurus OX=9913 GN=DAB1 PE=4 SV=1;tr|A0A3Q1LIN6|A0A3Q1LIN6_BOVIN DAB adaptor protein 1 OS=Bos taurus OX=	5	1	1	1	1	1	1	1	1	1	1	1	1	1	1	1	1	1	1	1	1	1	1.5	1.5	1.5	58.119	536	536;555;555;571;588	2.5	3	3	0.0027778	6.3895	By MS/MS	By MS/MS	By matching	By MS/MS	By MS/MS	By MS/MS	1.5
A0A3Q1LIQ5;A0A3Q1N9N7;A0A3Q1N2I7;A0A3Q1LU38;A0A3Q1MKK3;E1BB77;A0A3Q1N0T8;A0A3Q1LQ88	A0A3Q1LIQ5	DAB2IP	Membrane	0	A0A3Q1LIQ5;A0A3Q1N9N7;A0A3Q1N2I7;A0A3Q1LU38;A0A3Q1MKK3;E1BB77;A0A3Q1N0T8;A0A3Q1LQ88	1;1;1;1;1;1;1;1	1;1;1;1;1;1;1;1	1;1;1;1;1;1;1;1	tr|A0A3Q1LIQ5|A0A3Q1LIQ5_BOVIN DAB2 interacting protein OS=Bos taurus OX=9913 GN=DAB2IP PE=4 SV=1;tr|A0A3Q1N9N7|A0A3Q1N9N7_BOVIN DAB2 interacting protein OS=Bos taurus OX=9913 GN=DAB2IP PE=4 SV=1;tr|A0A3Q1N2I7|A0A3Q1N2I7_BOVIN DAB2 interacting protein OS=B	8	1	1	1	0	0	0	1	0	0	0	0	0	1	0	0	0	0	0	1	0	0	0.8	0.8	0.8	117.32	1065	1065;1077;1080;1090;1141;1157;1162;1169	4		1	1	-2				By MS/MS			0
A0A3Q1LZR1;F1MLS5;F1N3W8;A0A3Q1LJ39	A0A3Q1LZR1	SMURF2	Nuclear	0	A0A3Q1LZR1;F1MLS5;F1N3W8;A0A3Q1LJ39	1;1;1;1	1;1;1;1	1;1;1;1	tr|A0A3Q1LZR1|A0A3Q1LZR1_BOVIN SMAD specific E3 ubiquitin protein ligase 2 OS=Bos taurus OX=9913 GN=SMURF2 PE=4 SV=1;tr|F1MLS5|F1MLS5_BOVIN E3 ubiquitin-protein ligase OS=Bos taurus OX=9913 GN=SMURF1 PE=4 SV=3;tr|F1N3W8|F1N3W8_BOVIN E3 ubiquitin-protein li	4	1	1	1	0	1	1	0	0	0	0	1	1	0	0	0	0	1	1	0	0	0	10.4	10.4	10.4	7.5246	67	67;731;738;738	1	2		1	-2		By MS/MS	By MS/MS				0
A0A3Q1LXK9;A0A3Q1MQG2;A0A3Q1M2E4;A0A3Q1M6Q7;A0A3Q1NIP5;A0A3Q1LJL6;A0A3Q1LVA4;E1BF59;A0A3Q1LXH1;A0A3Q1MRS3	A0A3Q1LXK9	PLEC	Cytoskeletal	0	A0A3Q1LXK9;A0A3Q1MQG2;A0A3Q1M2E4;A0A3Q1M6Q7;A0A3Q1NIP5;A0A3Q1LJL6;A0A3Q1LVA4;E1BF59;A0A3Q1LXH1;A0A3Q1MRS3	9;9;9;9;9;9;9;9;9;9	9;9;9;9;9;9;9;9;9;9	9;9;9;9;9;9;9;9;9;9	tr|A0A3Q1LXK9|A0A3Q1LXK9_BOVIN Plectin OS=Bos taurus OX=9913 GN=PLEC PE=1 SV=1;tr|A0A3Q1MQG2|A0A3Q1MQG2_BOVIN Plectin OS=Bos taurus OX=9913 GN=PLEC PE=1 SV=1;tr|A0A3Q1M2E4|A0A3Q1M2E4_BOVIN Plectin OS=Bos taurus OX=9913 GN=PLEC PE=1 SV=1;tr|A0A3Q1M6Q7|A0A3Q	10	9	9	9	6	4	2	3	4	0	6	4	2	3	4	0	6	4	2	3	4	0	2.3	2.3	2.3	513.69	4516	4516;4535;4538;4548;4558;4558;4597;4671;4700;4712	2.11	12	7	0	52.524	By MS/MS	By MS/MS	By MS/MS	By MS/MS	By MS/MS		1.6
A0A3Q1LJT1	A0A3Q1LJT1	0	Cytosolic	0	A0A3Q1LJT1	1	1	1	tr|A0A3Q1LJT1|A0A3Q1LJT1_BOVIN Ig-like domain-containing protein OS=Bos taurus OX=9913 PE=4 SV=1	1	1	1	1	1	1	0	1	1	0	1	1	0	1	1	0	1	1	0	1	1	0	4.7	4.7	4.7	25.055	234	234	3	2	4	0	7.4761	By MS/MS	By MS/MS		By MS/MS	By MS/MS		4.7
A0A3Q1LLF1;A0A3Q1LKE5;F1MRZ6;A0A3Q1LIW2;A0A3Q1LTF1;A0A3Q1LU83;A0A3Q1NBB0;A0A3Q1MPD2;A0A3Q1M1X4;F1MRZ5	A0A3Q1LLF1	TNC	Core Matrisome	ECM Glycoproteins	A0A3Q1LLF1;A0A3Q1LKE5;F1MRZ6;A0A3Q1LIW2;A0A3Q1LTF1;A0A3Q1LU83;A0A3Q1NBB0;A0A3Q1MPD2;A0A3Q1M1X4;F1MRZ5	20;20;20;19;18;18;18;18;15;15	20;20;20;19;18;18;18;18;15;15	20;20;20;19;18;18;18;18;15;15	tr|A0A3Q1LLF1|A0A3Q1LLF1_BOVIN Uncharacterized protein OS=Bos taurus OX=9913 GN=TNC PE=3 SV=1;tr|A0A3Q1LKE5|A0A3Q1LKE5_BOVIN Uncharacterized protein OS=Bos taurus OX=9913 GN=TNC PE=3 SV=1;tr|F1MRZ6|F1MRZ6_BOVIN Uncharacterized protein OS=Bos taurus OX=9913	10	20	20	20	18	17	7	15	16	2	18	17	7	15	16	2	18	17	7	15	16	2	13.1	13.1	13.1	231.06	2110	2110;2201;2293;2019;1655;1746;1837;1928;1655;1746	2.3	43	33	0	181.71	By MS/MS	By MS/MS	By MS/MS	By MS/MS	By MS/MS	By matching	12.3
G3MXM2;A0A3Q1LKM8	G3MXM2	0	Cytosolic	0	G3MXM2;A0A3Q1LKM8	1;1	1;1	1;1	tr|G3MXM2|G3MXM2_BOVIN Uncharacterized protein OS=Bos taurus OX=9913 PE=4 SV=2;tr|A0A3Q1LKM8|A0A3Q1LKM8_BOVIN Uncharacterized protein OS=Bos taurus OX=9913 PE=4 SV=1	2	1	1	1	1	1	0	0	0	0	1	1	0	0	0	0	1	1	0	0	0	0	2.9	2.9	2.9	31.53	280	280;515	1	2		1	-2	By MS/MS	By MS/MS					2.9
A0A3Q1LKP0;F6Q6Y7;A4IFL4	A0A3Q1LKP0	PPARD	Nuclear	0	A0A3Q1LKP0;F6Q6Y7;A4IFL4	1;1;1	1;1;1	1;1;1	tr|A0A3Q1LKP0|A0A3Q1LKP0_BOVIN Peroxisome proliferator activated receptor delta OS=Bos taurus OX=9913 GN=PPARD PE=4 SV=1;tr|F6Q6Y7|F6Q6Y7_BOVIN Peroxisome proliferator activated receptor delta OS=Bos taurus OX=9913 GN=PPARD PE=3 SV=1;tr|A4IFL4|A4IFL4_BOVIN	3	1	1	1	0	1	0	1	1	0	0	1	0	1	1	0	0	1	0	1	1	0	1.7	1.7	1.7	46.211	403	403;431;441	3	1	2	0	12.577		By MS/MS		By matching	By MS/MS		0
A0A3Q1LKV8;F1MLV3;A0A3Q1ME81	A0A3Q1LKV8	TXNL1	Nuclear	0	A0A3Q1LKV8;F1MLV3;A0A3Q1ME81	2;2;2	2;2;2	2;2;2	tr|A0A3Q1LKV8|A0A3Q1LKV8_BOVIN Thioredoxin like 1 OS=Bos taurus OX=9913 GN=TXNL1 PE=1 SV=1;tr|F1MLV3|F1MLV3_BOVIN Thioredoxin like 1 OS=Bos taurus OX=9913 GN=TXNL1 PE=1 SV=1;tr|A0A3Q1ME81|A0A3Q1ME81_BOVIN Thioredoxin like 1 OS=Bos taurus OX=9913 GN=TXNL1 P	3	2	2	2	2	2	1	2	1	1	2	2	1	2	1	1	2	2	1	2	1	1	14.6	14.6	14.6	28.229	254	254;289;292	2.33	5	4	0	15.422	By MS/MS	By MS/MS	By MS/MS	By MS/MS	By MS/MS	By matching	14.6
A0A3Q1LL78;F6QFA5;A0JNE8	A0A3Q1LL78	LPCAT4	Membrane	0	A0A3Q1LL78;F6QFA5;A0JNE8	1;1;1	1;1;1	1;1;1	tr|A0A3Q1LL78|A0A3Q1LL78_BOVIN Lysophosphatidylcholine acyltransferase 4 OS=Bos taurus OX=9913 GN=LPCAT4 PE=4 SV=1;tr|F6QFA5|F6QFA5_BOVIN Lysophosphatidylcholine acyltransferase 4 OS=Bos taurus OX=9913 GN=LPCAT4 PE=4 SV=1;tr|A0JNE8|A0JNE8_BOVIN LPCAT4 prot	3	1	1	1	1	1	1	1	1	1	1	1	1	1	1	1	1	1	1	1	1	1	1.6	1.6	1.6	53.611	488	488;521;524	2.29	4	3	0	9.1106	By MS/MS	By MS/MS	By matching	By MS/MS	By MS/MS	By matching	1.6
A0A3Q1M494;A0A3Q1MJ66;A0A3Q1LLQ0;F1MPF7	A0A3Q1M494	PHIP	Nuclear	0	A0A3Q1M494;A0A3Q1MJ66;A0A3Q1LLQ0;F1MPF7	1;1;1;1	1;1;1;1	1;1;1;1	tr|A0A3Q1M494|A0A3Q1M494_BOVIN Pleckstrin homology domain interacting protein OS=Bos taurus OX=9913 GN=PHIP PE=4 SV=1;tr|A0A3Q1MJ66|A0A3Q1MJ66_BOVIN Pleckstrin homology domain interacting protein OS=Bos taurus OX=9913 GN=PHIP PE=4 SV=1;tr|A0A3Q1LLQ0|A0A3Q1	4	1	1	1	1	1	0	0	0	0	1	1	0	0	0	0	1	1	0	0	0	0	0.7	0.7	0.7	108.53	957	957;1400;1736;1825	1	2		1	-2	By MS/MS	By matching					0.7
Q2YDJ5;G3MZM9;A0A3Q1MFB0;A0A3Q1LLV6	Q2YDJ5	0	Cytosolic	0	Q2YDJ5;G3MZM9;A0A3Q1MFB0;A0A3Q1LLV6	1;1;1;1	1;1;1;1	1;1;1;1	sp|Q2YDJ5|CX066_BOVIN Uncharacterized protein CXorf66 homolog OS=Bos taurus OX=9913 PE=2 SV=2;tr|G3MZM9|G3MZM9_BOVIN Uncharacterized protein OS=Bos taurus OX=9913 GN=LOC107131211 PE=4 SV=2;tr|A0A3Q1MFB0|A0A3Q1MFB0_BOVIN Uncharacterized protein OS=Bos tauru	4	1	1	1	1	1	0	1	1	0	1	1	0	1	1	0	1	1	0	1	1	0	2.5	2.5	2.5	40.636	361	361;361;361;361	3	2	4	1	-2	By MS/MS	By MS/MS		By MS/MS	By MS/MS		2.5
A0A3Q1LLX7	A0A3Q1LLX7	FGF14	Matrisome Associated	Secreted Factors	A0A3Q1LLX7	1	1	1	tr|A0A3Q1LLX7|A0A3Q1LLX7_BOVIN Fibroblast growth factor OS=Bos taurus OX=9913 GN=FGF14 PE=3 SV=1	1	1	1	1	1	0	1	0	0	0	1	0	1	0	0	0	1	0	1	0	0	0	7.1	7.1	7.1	20.378	184	184	1	3		0	9.7953	By matching		By MS/MS				7.1
A0A3Q1M057;A0A3Q1LMA3;F1N169	A0A3Q1M057	FLNA	Cytoskeletal	0	A0A3Q1M057;A0A3Q1LMA3;F1N169	4;4;4	4;4;4	4;4;4	tr|A0A3Q1M057|A0A3Q1M057_BOVIN Filamin A OS=Bos taurus OX=9913 GN=FLNA PE=1 SV=1;tr|A0A3Q1LMA3|A0A3Q1LMA3_BOVIN Filamin A OS=Bos taurus OX=9913 GN=FLNA PE=1 SV=1;tr|F1N169|F1N169_BOVIN Filamin A OS=Bos taurus OX=9913 GN=FLNA PE=1 SV=3	3	4	4	4	3	4	3	4	4	0	3	4	3	4	4	0	3	4	3	4	4	0	2.7	2.7	2.7	270.48	2548	2548;2556;2647	2.17	14	9	0	33.192	By MS/MS	By MS/MS	By MS/MS	By MS/MS	By MS/MS		1.8
A6QLL8;A0A3Q1LMG1	A6QLL8	ALDOA	Cytoskeletal	0	A6QLL8;A0A3Q1LMG1	2;2	2;2	2;2	tr|A6QLL8|A6QLL8_BOVIN Fructose-bisphosphate aldolase OS=Bos taurus OX=9913 GN=ALDOA PE=1 SV=1;tr|A0A3Q1LMG1|A0A3Q1LMG1_BOVIN Fructose-bisphosphate aldolase OS=Bos taurus OX=9913 GN=ALDOA PE=1 SV=1	2	2	2	2	2	2	1	1	1	0	2	2	1	1	1	0	2	2	1	1	1	0	7.1	7.1	7.1	39.436	364	364;365	1.86	5	2	0	12.37	By matching	By MS/MS	By MS/MS	By MS/MS	By MS/MS		7.1
A0A3Q1M8L6;P19120;A0A3Q1LMS5	A0A3Q1M8L6	HSPA8	Cytoskeletal	0	A0A3Q1M8L6;P19120;A0A3Q1LMS5	7;7;7	4;4;4	3;3;3	tr|A0A3Q1M8L6|A0A3Q1M8L6_BOVIN Heat shock cognate 71 kDa protein OS=Bos taurus OX=9913 GN=HSPA8 PE=1 SV=1;sp|P19120|HSP7C_BOVIN Heat shock cognate 71 kDa protein OS=Bos taurus OX=9913 GN=HSPA8 PE=1 SV=2;tr|A0A3Q1LMS5|A0A3Q1LMS5_BOVIN Heat shock cognate 71	3	7	4	3	7	7	3	5	6	0	4	4	2	3	4	0	3	3	2	2	3	0	12.2	9.4	5.4	66.772	607	607;650;654	2.5	12	12	0	99.14	By MS/MS	By MS/MS	By MS/MS	By MS/MS	By MS/MS		12.2
A0A3Q1NLJ8;A0A3Q1LT82;A0A3Q1LV88;A0A3Q1LRZ6;A0A3Q1M3I4;A0A3Q1LMT1;A0A3Q1LTY1;A0A3Q1MQT0;F1MIP7	A0A3Q1NLJ8	ABCC2	Membrane	0	A0A3Q1NLJ8;A0A3Q1LT82;A0A3Q1LV88;A0A3Q1LRZ6;A0A3Q1M3I4;A0A3Q1LMT1;A0A3Q1LTY1;A0A3Q1MQT0;F1MIP7	1;1;1;1;1;1;1;1;1	1;1;1;1;1;1;1;1;1	1;1;1;1;1;1;1;1;1	tr|A0A3Q1NLJ8|A0A3Q1NLJ8_BOVIN ATP binding cassette subfamily C member 2 OS=Bos taurus OX=9913 GN=ABCC2 PE=3 SV=1;tr|A0A3Q1LT82|A0A3Q1LT82_BOVIN ATP binding cassette subfamily C member 2 OS=Bos taurus OX=9913 GN=ABCC2 PE=3 SV=1;tr|A0A3Q1LV88|A0A3Q1LV88_BOV	9	1	1	1	0	0	0	1	1	0	0	0	0	1	1	0	0	0	0	1	1	0	0.7	0.7	0.7	145.45	1298	1298;1318;1355;1472;1497;1516;1517;1530;1543	4		2	1	-2				By MS/MS	By MS/MS		0
A0A3Q1LMV5;P28801;A0A452DHY4	A0A3Q1LMV5	GSTP1	Nuclear	0	A0A3Q1LMV5;P28801	4;4;1	4;4;1	4;4;1	tr|A0A3Q1LMV5|A0A3Q1LMV5_BOVIN GST class-pi OS=Bos taurus OX=9913 GN=GSTP1 PE=3 SV=1;sp|P28801|GSTP1_BOVIN Glutathione S-transferase P OS=Bos taurus OX=9913 GN=GSTP1 PE=1 SV=2	3	4	4	4	4	4	2	1	1	0	4	4	2	1	1	0	4	4	2	1	1	0	31.2	31.2	31.2	26.745	240	240;210;191	1.75	12	4	0	323.31	By MS/MS	By MS/MS	By MS/MS	By MS/MS	By MS/MS		31.2
Q1JPB0;A0A3Q1LN63	Q1JPB0	SERPINB1	Cytosolic	0	Q1JPB0;A0A3Q1LN63	10;10	9;9	9;9	sp|Q1JPB0|ILEU_BOVIN Leukocyte elastase inhibitor OS=Bos taurus OX=9913 GN=SERPINB1 PE=2 SV=2;tr|A0A3Q1LN63|A0A3Q1LN63_BOVIN Leukocyte elastase inhibitor OS=Bos taurus OX=9913 GN=SERPINB1 PE=1 SV=1	2	10	9	9	8	9	4	6	6	1	8	8	4	6	6	1	8	8	4	6	6	1	21.5	18.8	18.8	42.235	377	377;410	2.17	22	14	0	91.387	By MS/MS	By MS/MS	By MS/MS	By MS/MS	By MS/MS	By MS/MS	18.8
A0A3Q1LNA6;E1B945	A0A3Q1LNA6	ANAPC4	Nuclear	0	A0A3Q1LNA6;E1B945	1;1	1;1	1;1	tr|A0A3Q1LNA6|A0A3Q1LNA6_BOVIN Anaphase-promoting complex subunit 4 OS=Bos taurus OX=9913 GN=ANAPC4 PE=3 SV=1;tr|E1B945|E1B945_BOVIN Anaphase-promoting complex subunit 4 OS=Bos taurus OX=9913 GN=ANAPC4 PE=3 SV=1	2	1	1	1	0	0	1	0	0	0	0	0	1	0	0	0	0	0	1	0	0	0	1.5	1.5	1.5	89.25	784	784;808	1	1		1	-2			By MS/MS				0
A0A3Q1LND7;Q29RK4;A0A3Q1M2P9;A3KMV2	A0A3Q1LND7	0	Cytosolic	0	A0A3Q1LND7;Q29RK4;A0A3Q1M2P9;A3KMV2	2;2;1;1	2;2;1;1	2;2;1;1	tr|A0A3Q1LND7|A0A3Q1LND7_BOVIN UV excision repair protein RAD23 OS=Bos taurus OX=9913 PE=3 SV=1;sp|Q29RK4|RD23B_BOVIN UV excision repair protein RAD23 homolog B OS=Bos taurus OX=9913 GN=RAD23B PE=2 SV=1;tr|A0A3Q1M2P9|A0A3Q1M2P9_BOVIN UV excision repair pro	4	2	2	2	0	0	0	2	2	0	0	0	0	2	2	0	0	0	0	2	2	0	5.7	5.7	5.7	36.118	334	334;408;360;362	4		4	0	11.672				By MS/MS	By MS/MS		0
A0A3Q1LNE7;Q08E54;A0A3S5ZPG2;A0A3Q1MI56;A0A3Q1MGE4;A0A3Q1MLQ6;A0A3Q1LUG2	A0A3Q1LNE7	APP	Cytoskeletal	0	A0A3Q1LNE7;Q08E54;A0A3S5ZPG2;A0A3Q1MI56;A0A3Q1MGE4;A0A3Q1MLQ6;A0A3Q1LUG2	2;2;2;2;2;2;2	2;2;2;2;2;2;2	2;2;2;2;2;2;2	tr|A0A3Q1LNE7|A0A3Q1LNE7_BOVIN ABPP OS=Bos taurus OX=9913 GN=APP PE=3 SV=1;tr|Q08E54|Q08E54_BOVIN ABPP OS=Bos taurus OX=9913 GN=APP PE=2 SV=1;tr|A0A3S5ZPG2|A0A3S5ZPG2_BOVIN ABPP OS=Bos taurus OX=9913 GN=APP PE=3 SV=1;tr|A0A3Q1MI56|A0A3Q1MI56_BOVIN ABPP OS=	7	2	2	2	2	1	2	0	0	0	2	1	2	0	0	0	2	1	2	0	0	0	4.2	4.2	4.2	78.595	694	694;695;714;721;751;752;770	1	5		0	14.984	By MS/MS	By MS/MS	By matching				4.2
A0A3Q1LNF9;E1BDH4	A0A3Q1LNF9	KIF18A	Cytoskeletal	0	A0A3Q1LNF9;E1BDH4	1;1	1;1	1;1	tr|A0A3Q1LNF9|A0A3Q1LNF9_BOVIN Kinesin-like protein OS=Bos taurus OX=9913 GN=KIF18A PE=3 SV=1;tr|E1BDH4|E1BDH4_BOVIN Kinesin-like protein OS=Bos taurus OX=9913 GN=KIF18A PE=3 SV=1	2	1	1	1	0	0	0	0	0	1	0	0	0	0	0	1	0	0	0	0	0	1	1	1	1	100	879	879;893	4		1	1	-2						By MS/MS	0
A7YY47;A0A3Q1LNG7	A7YY47	LMNB1	Cytoskeletal	0	A7YY47;A0A3Q1LNG7	1;1	1;1	1;1	tr|A7YY47|A7YY47_BOVIN LMNB1 protein OS=Bos taurus OX=9913 GN=LMNB1 PE=1 SV=1;tr|A0A3Q1LNG7|A0A3Q1LNG7_BOVIN Lamin B1 OS=Bos taurus OX=9913 GN=LMNB1 PE=1 SV=1	2	1	1	1	1	1	1	1	1	0	1	1	1	1	1	0	1	1	1	1	1	0	2	2	2	66.42	586	586;586	2.2	3	2	0	41.106	By MS/MS	By MS/MS	By MS/MS	By MS/MS	By MS/MS		2
A0A3Q1LNJ0;A7YWT7;A0A3Q1MIN4;A0A3Q1MNU9;A0A3Q1LWV3	A0A3Q1LNJ0	CLUAP1	Cytoskeletal	0	A0A3Q1LNJ0;A7YWT7;A0A3Q1MIN4;A0A3Q1MNU9;A0A3Q1LWV3	1;1;1;1;1	1;1;1;1;1	1;1;1;1;1	tr|A0A3Q1LNJ0|A0A3Q1LNJ0_BOVIN Clusterin associated protein 1 OS=Bos taurus OX=9913 GN=CLUAP1 PE=3 SV=1;tr|A7YWT7|A7YWT7_BOVIN CLUAP1 protein OS=Bos taurus OX=9913 GN=CLUAP1 PE=2 SV=1;tr|A0A3Q1MIN4|A0A3Q1MIN4_BOVIN Clusterin associated protein 1 OS=Bos tau	5	1	1	1	0	1	0	0	0	0	0	1	0	0	0	0	0	1	0	0	0	0	1.6	1.6	1.6	49.112	427	427;431;438;446;457	1	1		1	-2		By MS/MS					0
F1N5J8;A0A3Q1LNW7	F1N5J8	DECR1	Cytosolic	0	F1N5J8;A0A3Q1LNW7	2;2	2;2	2;2	tr|F1N5J8|F1N5J8_BOVIN 2,4-dienoyl-CoA reductase 1 OS=Bos taurus OX=9913 GN=DECR1 PE=1 SV=1;tr|A0A3Q1LNW7|A0A3Q1LNW7_BOVIN 2,4-dienoyl-CoA reductase 1 OS=Bos taurus OX=9913 GN=DECR1 PE=1 SV=1	2	2	2	2	0	2	0	0	0	0	0	2	0	0	0	0	0	2	0	0	0	0	9.7	9.7	9.7	35.352	329	329;329	1	2		0	11.792		By MS/MS					0
A0A3Q1LP15;Q32PD0	A0A3Q1LP15	0	Cytosolic	0	A0A3Q1LP15;Q32PD0	1;1	1;1	1;1	tr|A0A3Q1LP15|A0A3Q1LP15_BOVIN PINc domain-containing protein OS=Bos taurus OX=9913 PE=4 SV=1;sp|Q32PD0|FCF1_BOVIN rRNA-processing protein FCF1 homolog OS=Bos taurus OX=9913 GN=FCF1 PE=2 SV=1	2	1	1	1	1	1	1	0	0	0	1	1	1	0	0	0	1	1	1	0	0	0	4.2	4.2	4.2	19.376	165	165;198	1	3		1	-2	By matching	By matching	By MS/MS				4.2
A0A3Q1LP66;A0A452DHZ3;Q9N2I2;CON__Q9N2I2;A0A3Q1MRW0	A0A3Q1LP66	SERPINA5	Matrisome Associated	ECM Regulators	A0A3Q1LP66;A0A452DHZ3;Q9N2I2;CON__Q9N2I2	3;3;3;3;1	3;3;3;3;1	3;3;3;3;1	tr|A0A3Q1LP66|A0A3Q1LP66_BOVIN Plasma serine protease inhibitor OS=Bos taurus OX=9913 GN=SERPINA5 PE=3 SV=1;tr|A0A452DHZ3|A0A452DHZ3_BOVIN Plasma serine protease inhibitor OS=Bos taurus OX=9913 GN=SERPINA5 PE=3 SV=1;sp|Q9N2I2|IPSP_BOVIN Plasma serine prote	5	3	3	3	3	2	2	2	2	0	3	2	2	2	2	0	3	2	2	2	2	0	14.4	14.4	14.4	41.047	369	369;389;404;404;333	2.09	7	4	0	18.73	By MS/MS	By MS/MS	By MS/MS	By MS/MS	By MS/MS		14.4
A0A3Q1LPG0	A0A3Q1LPG0	0	Cytosolic	0	A0A3Q1LPG0	6	5	5	tr|A0A3Q1LPG0|A0A3Q1LPG0_BOVIN Uncharacterized protein OS=Bos taurus OX=9913 PE=1 SV=1	1	6	5	5	5	5	2	3	2	1	4	4	1	3	2	1	4	4	1	3	2	1	25	20.6	20.6	35.568	320	320	2.33	10	8	0	43.351	By MS/MS	By MS/MS	By MS/MS	By MS/MS	By MS/MS	By matching	21.2
Q32P85;A0A3Q1LPL0;A0A3Q1MNP8	Q32P85	DYNLRB2 DNLC2B	Cytosolic	0	Q32P85;A0A3Q1LPL0;A0A3Q1MNP8	1;1;1	1;1;1	1;1;1	sp|Q32P85|DLRB2_BOVIN Dynein light chain roadblock-type 2 OS=Bos taurus OX=9913 GN=DYNLRB2 PE=3 SV=1;tr|A0A3Q1LPL0|A0A3Q1LPL0_BOVIN Dynein light chain roadblock OS=Bos taurus OX=9913 GN=DYNLRB2 PE=3 SV=1;tr|A0A3Q1MNP8|A0A3Q1MNP8_BOVIN Dynein light chain ro	3	1	1	1	0	0	1	1	1	0	0	0	1	1	1	0	0	0	1	1	1	0	9.4	9.4	9.4	10.845	96	96;96;174	3	1	2	0.0099751	6.1483			By MS/MS	By MS/MS	By MS/MS		0
A0A3Q1LPN6;A0A3Q1M278;P62194	A0A3Q1LPN6	PSMC5	Nuclear	0	A0A3Q1LPN6;A0A3Q1M278;P62194	1;1;1	1;1;1	1;1;1	tr|A0A3Q1LPN6|A0A3Q1LPN6_BOVIN 26S proteasome regulatory subunit 8 OS=Bos taurus OX=9913 GN=PSMC5 PE=3 SV=1;tr|A0A3Q1M278|A0A3Q1M278_BOVIN 26S proteasome regulatory subunit 8 OS=Bos taurus OX=9913 GN=PSMC5 PE=3 SV=1;sp|P62194|PRS8_BOVIN 26S proteasome regu	3	1	1	1	0	0	1	0	0	0	0	0	1	0	0	0	0	0	1	0	0	0	3.6	3.6	3.6	43.431	389	389;398;406	1	1		1	-2			By MS/MS				0
A0A3Q1LPQ0;P05307;F6Q9Q9	A0A3Q1LPQ0	P4HB	Membrane	0	A0A3Q1LPQ0;P05307;F6Q9Q9	1;1;1	1;1;1	1;1;1	tr|A0A3Q1LPQ0|A0A3Q1LPQ0_BOVIN Protein disulfide-isomerase OS=Bos taurus OX=9913 GN=P4HB PE=1 SV=1;sp|P05307|PDIA1_BOVIN Protein disulfide-isomerase OS=Bos taurus OX=9913 GN=P4HB PE=1 SV=1;tr|F6Q9Q9|F6Q9Q9_BOVIN Protein disulfide-isomerase OS=Bos taurus OX	3	1	1	1	1	1	1	1	1	0	1	1	1	1	1	0	1	1	1	1	1	0	3.3	3.3	3.3	54.399	488	488;510;565	2.2	3	2	0	130.59	By MS/MS	By matching	By MS/MS	By MS/MS	By MS/MS		3.3
A0A3Q1MKX8;Q3MHN5;F1N5M2;CON__Q3MHN5;A0A3Q1LQ02;CON__ENSEMBL:ENSBTAP00000018229	A0A3Q1MKX8	GC	Cytosolic	0	A0A3Q1MKX8;Q3MHN5;F1N5M2;CON__Q3MHN5;A0A3Q1LQ02;CON__ENSEMBL:ENSBTAP00000018229	2;2;2;2;2;1	2;2;2;2;2;1	2;2;2;2;2;1	tr|A0A3Q1MKX8|A0A3Q1MKX8_BOVIN Gc-globulin OS=Bos taurus OX=9913 GN=GC PE=4 SV=1;sp|Q3MHN5|VTDB_BOVIN Vitamin D-binding protein OS=Bos taurus OX=9913 GN=GC PE=2 SV=1;tr|F1N5M2|F1N5M2_BOVIN Gc-globulin OS=Bos taurus OX=9913 GN=GC PE=4 SV=2;;tr|A0A3Q1LQ02|A0	6	2	2	2	2	2	2	1	1	0	2	2	2	1	1	0	2	2	2	1	1	0	4.1	4.1	4.1	52.005	465	465;474;474;474;475;475	1.75	6	2	0	12.258	By MS/MS	By MS/MS	By MS/MS	By MS/MS	By MS/MS		4.1
A0A3Q1LQ81;A0A3Q1MI22;A0A3Q1NJB1;A0A3Q1LR93;F1N076;CON__ENSEMBL:ENSBTAP00000031900	A0A3Q1LQ81	CP	Cytosolic	0	A0A3Q1LQ81;A0A3Q1MI22;A0A3Q1NJB1;A0A3Q1LR93;F1N076;CON__ENSEMBL:ENSBTAP00000031900	2;2;2;2;2;1	2;2;2;2;2;1	2;2;2;2;2;1	tr|A0A3Q1LQ81|A0A3Q1LQ81_BOVIN Ceruloplasmin OS=Bos taurus OX=9913 GN=CP PE=1 SV=1;tr|A0A3Q1MI22|A0A3Q1MI22_BOVIN Ceruloplasmin OS=Bos taurus OX=9913 GN=CP PE=1 SV=1;tr|A0A3Q1NJB1|A0A3Q1NJB1_BOVIN Ceruloplasmin OS=Bos taurus OX=9913 GN=CP PE=1 SV=1;tr|A0A3	6	2	2	2	2	2	2	1	2	0	2	2	2	1	2	0	2	2	2	1	2	0	2.8	2.8	2.8	115.82	1014	1014;1043;1060;1063;1074;1064	2	6	3	0	14.717	By MS/MS	By MS/MS	By MS/MS	By MS/MS	By MS/MS		2.8
A0A3Q1LQD4	A0A3Q1LQD4	0	Cytosolic	0	A0A3Q1LQD4	1	1	1	tr|A0A3Q1LQD4|A0A3Q1LQD4_BOVIN Uncharacterized protein OS=Bos taurus OX=9913 PE=4 SV=1	1	1	1	1	0	0	0	0	0	1	0	0	0	0	0	1	0	0	0	0	0	1	11.2	11.2	11.2	17.849	170	170	4		1	0	17.857						By MS/MS	0
A0A3Q1MQ74;G3X755;A0A3Q1LQI3;A0A3Q1MUJ8	A0A3Q1MQ74	PLXNB2	Matrisome Associated	ECM-affiliated Proteins	A0A3Q1MQ74;G3X755;A0A3Q1LQI3;A0A3Q1MUJ8	1;1;1;1	1;1;1;1	1;1;1;1	tr|A0A3Q1MQ74|A0A3Q1MQ74_BOVIN Plexin B2 OS=Bos taurus OX=9913 GN=PLXNB2 PE=3 SV=1;tr|G3X755|G3X755_BOVIN Plexin B2 OS=Bos taurus OX=9913 GN=PLXNB2 PE=3 SV=2;tr|A0A3Q1LQI3|A0A3Q1LQI3_BOVIN Plexin B2 OS=Bos taurus OX=9913 GN=PLXNB2 PE=3 SV=1;tr|A0A3Q1MUJ8|A	4	1	1	1	1	1	0	0	0	0	1	1	0	0	0	0	1	1	0	0	0	0	0.7	0.7	0.7	204.95	1843	1843;1937;1988;2071	1	2		0.0053191	6.2838	By MS/MS	By MS/MS					0.7
F6PSK5;A0A3Q1MKU4;A0A3Q1LQK2;E1BFL8	F6PSK5	IL1RAP	Membrane	0	F6PSK5;A0A3Q1MKU4;A0A3Q1LQK2;E1BFL8	2;2;2;2	2;2;2;2	2;2;2;2	tr|F6PSK5|F6PSK5_BOVIN Interleukin 1 receptor accessory protein OS=Bos taurus OX=9913 GN=IL1RAP PE=3 SV=1;tr|A0A3Q1MKU4|A0A3Q1MKU4_BOVIN Interleukin 1 receptor accessory protein OS=Bos taurus OX=9913 GN=IL1RAP PE=3 SV=1;tr|A0A3Q1LQK2|A0A3Q1LQK2_BOVIN Inter	4	2	2	2	2	1	1	1	2	0	2	1	1	1	2	0	2	1	1	1	2	0	4.4	4.4	4.4	60.01	520	520;568;639;685	2.29	4	3	0	13.309	By MS/MS	By matching	By MS/MS	By MS/MS	By MS/MS		4.4
A0A3Q1LQQ2;A0A3Q1MEJ1;A0A3Q1MMP4;A0A3Q1M6M8;A0A3Q1M2W2;E1B8E7	A0A3Q1LQQ2	HTT	Cytoskeletal	0	A0A3Q1LQQ2;A0A3Q1MEJ1;A0A3Q1MMP4;A0A3Q1M6M8;A0A3Q1M2W2;E1B8E7	1;1;1;1;1;1	1;1;1;1;1;1	1;1;1;1;1;1	tr|A0A3Q1LQQ2|A0A3Q1LQQ2_BOVIN Huntingtin OS=Bos taurus OX=9913 GN=HTT PE=3 SV=1;tr|A0A3Q1MEJ1|A0A3Q1MEJ1_BOVIN Huntingtin OS=Bos taurus OX=9913 GN=HTT PE=3 SV=1;tr|A0A3Q1MMP4|A0A3Q1MMP4_BOVIN Huntingtin OS=Bos taurus OX=9913 GN=HTT PE=3 SV=1;tr|A0A3Q1M6M8	6	1	1	1	0	0	0	0	0	1	0	0	0	0	0	1	0	0	0	0	0	1	0.7	0.7	0.7	118.76	1092	1092;3025;3052;3059;3070;3078	4		1	1	-2						By MS/MS	0
A0A3Q1LR94;F1MTV9;Q3T160	A0A3Q1LR94	0	Cytosolic	0	A0A3Q1LR94;F1MTV9;Q3T160	1;1;1	1;1;1	1;1;1	tr|A0A3Q1LR94|A0A3Q1LR94_BOVIN Nucleoplasmin domain-containing protein OS=Bos taurus OX=9913 PE=3 SV=1;tr|F1MTV9|F1MTV9_BOVIN Nucleophosmin OS=Bos taurus OX=9913 GN=NPM1 PE=3 SV=3;sp|Q3T160|NPM_BOVIN Nucleophosmin OS=Bos taurus OX=9913 GN=NPM1 PE=2 SV=1	3	1	1	1	0	0	1	0	0	0	0	0	1	0	0	0	0	0	1	0	0	0	5.4	5.4	5.4	26.661	242	242;276;294	1	1		0.002907	6.5125			By MS/MS				0
A0A3Q1LRP5;CON__Q3KUS7;P81187	A0A3Q1LRP5	CFB	Cytosolic	0	A0A3Q1LRP5;CON__Q3KUS7;P81187	3;3;3	3;3;3	3;3;3	tr|A0A3Q1LRP5|A0A3Q1LRP5_BOVIN C3/C5 convertase OS=Bos taurus OX=9913 GN=CFB PE=1 SV=1;;sp|P81187|CFAB_BOVIN Complement factor B OS=Bos taurus OX=9913 GN=CFB PE=1 SV=2	3	3	3	3	3	3	2	3	2	1	3	3	2	3	2	1	3	3	2	3	2	1	4.8	4.8	4.8	81.46	725	725;760;761	2.5	10	10	0	37.499	By MS/MS	By MS/MS	By MS/MS	By MS/MS	By MS/MS	By matching	4.8
A0A3Q1LS55;Q5GN72;Q3SZR3;CON__Q3SZR3	A0A3Q1LS55	ORM1	Cytosolic	0	A0A3Q1LS55;Q5GN72;Q3SZR3;CON__Q3SZR3	6;6;6;6	6;6;6;6	6;6;6;6	tr|A0A3Q1LS55|A0A3Q1LS55_BOVIN Alpha-1-acid glycoprotein OS=Bos taurus OX=9913 GN=ORM1 PE=3 SV=1;tr|Q5GN72|Q5GN72_BOVIN Alpha-1-acid glycoprotein OS=Bos taurus OX=9913 GN=agp PE=2 SV=2;sp|Q3SZR3|A1AG_BOVIN Alpha-1-acid glycoprotein OS=Bos taurus OX=9913 GN	4	6	6	6	5	6	6	6	6	0	5	6	6	6	6	0	5	6	6	6	6	0	28.9	28.9	28.9	21.44	187	187;202;202;202	2.24	17	12	0	59.789	By MS/MS	By MS/MS	By MS/MS	By MS/MS	By MS/MS		28.9
P62157;A0A452DIM7;A0A452DJ55;A0A3Q1M6C6;A0A3Q1LSI9;A0A3Q1MR28;F1MLH6	P62157	CALM CAM	Cytosolic	0	P62157;A0A452DIM7;A0A452DJ55;A0A3Q1M6C6;A0A3Q1LSI9;A0A3Q1MR28;F1MLH6	3;3;3;3;3;2;2	3;3;3;3;3;2;2	3;3;3;3;3;2;2	sp|P62157|CALM_BOVIN Calmodulin OS=Bos taurus OX=9913 GN=CALM PE=1 SV=2;tr|A0A452DIM7|A0A452DIM7_BOVIN Uncharacterized protein OS=Bos taurus OX=9913 GN=CALM3 PE=4 SV=1;tr|A0A452DJ55|A0A452DJ55_BOVIN Uncharacterized protein OS=Bos taurus OX=9913 GN=CALM1 PE	7	3	3	3	3	3	3	1	1	0	3	3	3	1	1	0	3	3	3	1	1	0	25.5	25.5	25.5	16.837	149	149;149;150;150;156;149;149	1.8	11	4	0	19.618	By MS/MS	By MS/MS	By MS/MS	By MS/MS	By MS/MS		25.5
A0A3Q1LSL4;F1MBV6;Q3ZCA8;A0A3Q1N4K8;E1BE76	A0A3Q1LSL4	TPD52	Cytosolic	0	A0A3Q1LSL4;F1MBV6;Q3ZCA8;A0A3Q1N4K8;E1BE76	1;1;1;1;1	1;1;1;1;1	1;1;1;1;1	tr|A0A3Q1LSL4|A0A3Q1LSL4_BOVIN Uncharacterized protein OS=Bos taurus OX=9913 GN=TPD52 PE=3 SV=1;tr|F1MBV6|F1MBV6_BOVIN Uncharacterized protein OS=Bos taurus OX=9913 GN=TPD52 PE=3 SV=2;tr|Q3ZCA8|Q3ZCA8_BOVIN Tumor protein D52 OS=Bos taurus OX=9913 GN=TPD52	5	1	1	1	1	1	1	1	1	0	1	1	1	1	1	0	1	1	1	1	1	0	8.3	8.3	8.3	19.39	180	180;207;224;238;247	2.2	3	2	0	20.234	By MS/MS	By MS/MS	By MS/MS	By MS/MS	By MS/MS		8.3
A0A3Q1LSN0;F1MYX5	A0A3Q1LSN0	LCP1	Cytoskeletal	0	A0A3Q1LSN0;F1MYX5	7;7	7;7	6;6	tr|A0A3Q1LSN0|A0A3Q1LSN0_BOVIN Lymphocyte cytosolic protein 1 OS=Bos taurus OX=9913 GN=LCP1 PE=1 SV=1;tr|F1MYX5|F1MYX5_BOVIN Lymphocyte cytosolic protein 1 OS=Bos taurus OX=9913 GN=LCP1 PE=1 SV=2	2	7	7	6	4	4	2	2	1	0	4	4	2	2	1	0	4	3	2	2	1	0	15.6	15.6	13.6	70.111	627	627;631	1.69	10	3	0	61.14	By MS/MS	By MS/MS	By MS/MS	By MS/MS	By MS/MS		8.9
A0A3Q1LSN5	A0A3Q1LSN5	0	Cytosolic	0	A0A3Q1LSN5	1	1	1	tr|A0A3Q1LSN5|A0A3Q1LSN5_BOVIN Uncharacterized protein OS=Bos taurus OX=9913 PE=4 SV=1	1	1	1	1	0	0	0	0	0	1	0	0	0	0	0	1	0	0	0	0	0	1	16.7	16.7	16.7	11.811	120	120	4		1	1	-2						By MS/MS	0
Q2KIV8;A0A3Q1LSN6	Q2KIV8	GSTM3	Cytosolic	0	Q2KIV8;A0A3Q1LSN6	7;7	6;6	5;5	tr|Q2KIV8|Q2KIV8_BOVIN Glutathione S-transferase OS=Bos taurus OX=9913 GN=GSTM3 PE=1 SV=1;tr|A0A3Q1LSN6|A0A3Q1LSN6_BOVIN Glutathione S-transferase OS=Bos taurus OX=9913 GN=GSTM3 PE=1 SV=1	2	7	6	5	3	4	5	2	2	2	2	3	4	1	1	1	1	3	3	1	1	1	23.6	19.6	15.6	26.85	225	225;240	1.75	9	3	0	35.535	By MS/MS	By MS/MS	By MS/MS	By MS/MS	By MS/MS	By matching	12.4
E1BM32;A0A3Q1LST7	E1BM32	SLC8A3	Cytoskeletal	0	E1BM32;A0A3Q1LST7	1;1	1;1	1;1	tr|E1BM32|E1BM32_BOVIN Solute carrier family 8 member A3 OS=Bos taurus OX=9913 GN=SLC8A3 PE=3 SV=2;tr|A0A3Q1LST7|A0A3Q1LST7_BOVIN Solute carrier family 8 member A3 OS=Bos taurus OX=9913 GN=SLC8A3 PE=3 SV=1	2	1	1	1	0	0	0	0	0	1	0	0	0	0	0	1	0	0	0	0	0	1	1.1	1.1	1.1	102.51	921	921;927	4		1	1	-2						By MS/MS	0
A0A3Q1LST9;E1BB24	A0A3Q1LST9	RBM46	Nuclear	0	A0A3Q1LST9;E1BB24	1;1	1;1	1;1	tr|A0A3Q1LST9|A0A3Q1LST9_BOVIN Probable RNA-binding protein 46 OS=Bos taurus OX=9913 GN=RBM46 PE=4 SV=1;tr|E1BB24|E1BB24_BOVIN Probable RNA-binding protein 46 OS=Bos taurus OX=9913 GN=RBM46 PE=4 SV=1	2	1	1	1	0	0	0	0	0	1	0	0	0	0	0	1	0	0	0	0	0	1	1.6	1.6	1.6	55.198	485	485;533	4		1	1	-2						By MS/MS	0
A0A3Q1MFF3;Q17QK3;A0A3Q1LSW9;A0A3Q1M524	A0A3Q1MFF3	CPQ	Cytosolic	0	A0A3Q1MFF3;Q17QK3;A0A3Q1LSW9;A0A3Q1M524	7;7;7;7	7;7;7;7	7;7;7;7	tr|A0A3Q1MFF3|A0A3Q1MFF3_BOVIN Carboxypeptidase Q OS=Bos taurus OX=9913 GN=CPQ PE=4 SV=1;sp|Q17QK3|CBPQ_BOVIN Carboxypeptidase Q OS=Bos taurus OX=9913 GN=CPQ PE=2 SV=1;tr|A0A3Q1LSW9|A0A3Q1LSW9_BOVIN Carboxypeptidase Q OS=Bos taurus OX=9913 GN=CPQ PE=4 SV=1	4	7	7	7	6	5	3	4	4	1	6	5	3	4	4	1	6	5	3	4	4	1	19.7	19.7	19.7	49.276	452	452;472;483;484	2.27	15	11	0	51.577	By MS/MS	By MS/MS	By MS/MS	By MS/MS	By MS/MS	By MS/MS	17.7
A0A3Q1NDF8;B0JYK2;A0A3Q1LT67	A0A3Q1NDF8	NPC1	Membrane	0	A0A3Q1NDF8;B0JYK2;A0A3Q1LT67	1;1;1	1;1;1	1;1;1	tr|A0A3Q1NDF8|A0A3Q1NDF8_BOVIN NPC intracellular cholesterol transporter 1 OS=Bos taurus OX=9913 GN=NPC1 PE=3 SV=1;tr|B0JYK2|B0JYK2_BOVIN NPC intracellular cholesterol transporter 1 OS=Bos taurus OX=9913 GN=NPC1 PE=2 SV=1;tr|A0A3Q1LT67|A0A3Q1LT67_BOVIN NPC	3	1	1	1	1	1	1	1	1	0	1	1	1	1	1	0	1	1	1	1	1	0	1	1	1	139.1	1254	1254;1277;1282	2.2	6	4	0.0030581	6.6255	By MS/MS	By MS/MS	By matching	By MS/MS	By MS/MS		1
A0A3Q1LT90;CON__Q7Z3Y8;Q0P5J6;Q0P5J4;CON__Q7Z3Z0	A0A3Q1LT90	KRT27	Cytoskeletal	0	A0A3Q1LT90;CON__Q7Z3Y8;Q0P5J6;Q0P5J4;CON__Q7Z3Z0	3;3;3;2;2	1;1;1;1;1	1;1;1;1;1	tr|A0A3Q1LT90|A0A3Q1LT90_BOVIN Keratin, type I cytoskeletal 27 OS=Bos taurus OX=9913 GN=KRT27 PE=4 SV=1;;sp|Q0P5J6|K1C27_BOVIN Keratin, type I cytoskeletal 27 OS=Bos taurus OX=9913 GN=KRT27 PE=2 SV=1;sp|Q0P5J4|K1C25_BOVIN Keratin, type I cytoskeletal 25 OS	5	3	1	1	2	1	0	0	0	2	1	0	0	0	0	0	1	0	0	0	0	0	5.1	1.6	1.6	48.77	450	450;459;460;450;450	1	1		1	-2	By MS/MS	By matching				By matching	3.6
A0A3Q1LTB0;Q32LG3	A0A3Q1LTB0	MDH2	Membrane	0	A0A3Q1LTB0;Q32LG3	5;5	5;5	5;5	tr|A0A3Q1LTB0|A0A3Q1LTB0_BOVIN Malate dehydrogenase OS=Bos taurus OX=9913 GN=MDH2 PE=1 SV=1;sp|Q32LG3|MDHM_BOVIN Malate dehydrogenase, mitochondrial OS=Bos taurus OX=9913 GN=MDH2 PE=1 SV=1	2	5	5	5	2	2	3	2	1	2	2	2	3	2	1	2	2	2	3	2	1	2	20.5	20.5	20.5	33.005	312	312;338	2.25	7	5	0	31.011	By MS/MS	By MS/MS	By MS/MS	By MS/MS	By MS/MS	By MS/MS	8.7
Q2KJI3;A0A3Q1MH36;A0A3Q1LTT1;A0A3Q1N7H1	Q2KJI3	CYRIB FAM49B	Cytosolic	0	Q2KJI3;A0A3Q1MH36;A0A3Q1LTT1;A0A3Q1N7H1	1;1;1;1	1;1;1;1	1;1;1;1	sp|Q2KJI3|CYRIB_BOVIN CYFIP-related Rac1 interactor B OS=Bos taurus OX=9913 GN=CYRIB PE=2 SV=1;tr|A0A3Q1MH36|A0A3Q1MH36_BOVIN CYFIP-related Rac1 interactor B OS=Bos taurus OX=9913 GN=CYRIB PE=1 SV=1;tr|A0A3Q1LTT1|A0A3Q1LTT1_BOVIN CYFIP-related Rac1 interac	4	1	1	1	0	0	1	0	0	0	0	0	1	0	0	0	0	0	1	0	0	0	5.9	5.9	5.9	36.748	324	324;324;345;359	1	1		0.0028409	6.4309			By MS/MS				0
A0A3Q1LTW5	A0A3Q1LTW5	DNM1	Cytoskeletal	0	A0A3Q1LTW5	1	1	1	tr|A0A3Q1LTW5|A0A3Q1LTW5_BOVIN Dynamin GTPase OS=Bos taurus OX=9913 GN=DNM1 PE=3 SV=1	1	1	1	1	0	0	1	0	0	0	0	0	1	0	0	0	0	0	1	0	0	0	0.9	0.9	0.9	95.368	847	847	1	1		1	-2			By MS/MS				0
A0A3Q1MUA2;A0A3Q1MVV7;A0A3Q1LTZ2;F1N3U7;A0A3Q1MBT8;A0A3Q1N3A3	A0A3Q1MUA2	BPTF	Nuclear	0	A0A3Q1MUA2;A0A3Q1MVV7;A0A3Q1LTZ2;F1N3U7;A0A3Q1MBT8;A0A3Q1N3A3	1;1;1;1;1;1	1;1;1;1;1;1	1;1;1;1;1;1	tr|A0A3Q1MUA2|A0A3Q1MUA2_BOVIN Bromodomain PHD finger transcription factor OS=Bos taurus OX=9913 GN=BPTF PE=4 SV=1;tr|A0A3Q1MVV7|A0A3Q1MVV7_BOVIN Bromodomain PHD finger transcription factor OS=Bos taurus OX=9913 GN=BPTF PE=4 SV=1;tr|A0A3Q1LTZ2|A0A3Q1LTZ2_B	6	1	1	1	1	1	1	1	1	1	1	1	1	1	1	1	1	1	1	1	1	1	0.3	0.3	0.3	306.75	2756	2756;2765;2819;2824;2855;2882	2.29	4	3	0.0028818	6.4808	By matching	By MS/MS	By MS/MS	By matching	By MS/MS	By matching	0.3
F1MEQ3;A0A3Q1LTZ5;P11179;A0A3Q1MHE5	F1MEQ3	DLST	Nuclear	0	F1MEQ3;A0A3Q1LTZ5;P11179;A0A3Q1MHE5	2;2;2;2	2;2;2;2	2;2;2;2	tr|F1MEQ3|F1MEQ3_BOVIN Dihydrolipoyllysine-residue succinyltransferase component of 2-oxoglutarate dehydrogenase complex, mitochondrial OS=Bos taurus OX=9913 GN=DLST PE=3 SV=2;tr|A0A3Q1LTZ5|A0A3Q1LTZ5_BOVIN Dihydrolipoyllysine-residue succinyltransferase c	4	2	2	2	2	2	2	2	2	0	2	2	2	2	2	0	2	2	2	2	2	0	5.7	5.7	5.7	47.046	437	437;449;455;529	2.2	6	4	0	18.544	By MS/MS	By MS/MS	By MS/MS	By MS/MS	By MS/MS		5.7
A0A3Q1NE99;A0A3Q1NIA2;A0A3Q1LUE5;A0A3Q1NM85;A0A3Q1M799;A0A3Q1N6E2;A0A3Q1MJR0;A0A3Q1LU31;E1BGB0	A0A3Q1NE99	KIF13B	Cytoskeletal	0	A0A3Q1NE99;A0A3Q1NIA2;A0A3Q1LUE5;A0A3Q1NM85;A0A3Q1M799;A0A3Q1N6E2;A0A3Q1MJR0;A0A3Q1LU31;E1BGB0	1;1;1;1;1;1;1;1;1	1;1;1;1;1;1;1;1;1	1;1;1;1;1;1;1;1;1	tr|A0A3Q1NE99|A0A3Q1NE99_BOVIN Kinesin family member 13B OS=Bos taurus OX=9913 GN=KIF13B PE=3 SV=1;tr|A0A3Q1NIA2|A0A3Q1NIA2_BOVIN Kinesin family member 13B OS=Bos taurus OX=9913 GN=KIF13B PE=3 SV=1;tr|A0A3Q1LUE5|A0A3Q1LUE5_BOVIN Kinesin family member 13B O	9	1	1	1	0	0	0	1	1	0	0	0	0	1	1	0	0	0	0	1	1	0	0.4	0.4	0.4	186.62	1684	1684;1689;1689;1789;1796;1800;1806;1829;1880	4		2	0.0051948	6.2221				By MS/MS	By MS/MS		0
REV__F1N4L4;REV__A0A3Q1LRT9;REV__A0A3Q1LSC1;A0A3Q1LU37;F1ML81;A0A3Q1M6G9;A0A3Q1MJ10	REV__F1N4L4	Cytosolic	Cytosolic	0	REV__F1N4L4;REV__A0A3Q1LRT9;REV__A0A3Q1LSC1;A0A3Q1LU37;F1ML81;A0A3Q1M6G9;A0A3Q1MJ10	1;1;1;1;1;1;1	1;1;1;1;1;1;1	1;1;1;1;1;1;1	tr|F1N4L4|F1N4L4_BOVIN MLLT1 super elongation complex subunit OS=Bos taurus OX=9913 GN=MLLT1 PE=4 SV=3;tr|A0A3Q1LRT9|A0A3Q1LRT9_BOVIN MLLT1 super elongation complex subunit OS=Bos taurus OX=9913 GN=MLLT1 PE=4 SV=1;tr|A0A3Q1LSC1|A0A3Q1LSC1_BOVIN MLLT1 super	7	1	1	1	1	1	1	0	0	0	1	1	1	0	0	0	1	1	1	0	0	0	0.5	0.5	0.5	61.607	556	556;580;622;1406;1415;1580;1600	1	4		1	-2	By MS/MS	By matching	By MS/MS				0.5
A5D7M4;A0A3Q1LU70	A5D7M4	YBX2	Nuclear	0	A5D7M4;A0A3Q1LU70	2;2	2;2	2;2	tr|A5D7M4|A5D7M4_BOVIN Y-box binding protein 2 OS=Bos taurus OX=9913 GN=YBX2 PE=2 SV=1;tr|A0A3Q1LU70|A0A3Q1LU70_BOVIN Y-box binding protein 2 OS=Bos taurus OX=9913 GN=YBX2 PE=4 SV=1	2	2	2	2	1	1	0	2	2	0	1	1	0	2	2	0	1	1	0	2	2	0	11.7	11.7	11.7	38.268	360	360;405	3	2	4	0	53.507	By MS/MS	By MS/MS		By MS/MS	By MS/MS		7.5
A0A3Q1LU96	A0A3Q1LU96	ZFP64	Nuclear	0	A0A3Q1LU96	1	1	1	tr|A0A3Q1LU96|A0A3Q1LU96_BOVIN Uncharacterized protein OS=Bos taurus OX=9913 GN=ZFP64 PE=4 SV=1	1	1	1	1	0	0	0	0	0	1	0	0	0	0	0	1	0	0	0	0	0	1	2.7	2.7	2.7	37.597	332	332	4		1	1	-2						By MS/MS	0
A0A3Q1LWX8;A0A3Q1N1Y2;A0A3Q1LUC5;F1MEG3;A0A3Q1MIP0;A0A3Q1N0A0	A0A3Q1LWX8	LAMA1	Core Matrisome	ECM Glycoproteins	A0A3Q1LWX8;A0A3Q1N1Y2;A0A3Q1LUC5;F1MEG3;A0A3Q1MIP0;A0A3Q1N0A0	3;3;3;3;2;2	3;3;3;3;2;2	3;3;3;3;2;2	tr|A0A3Q1LWX8|A0A3Q1LWX8_BOVIN Laminin subunit alpha 1 OS=Bos taurus OX=9913 GN=LAMA1 PE=4 SV=1;tr|A0A3Q1N1Y2|A0A3Q1N1Y2_BOVIN Laminin subunit alpha 1 OS=Bos taurus OX=9913 GN=LAMA1 PE=4 SV=1;tr|A0A3Q1LUC5|A0A3Q1LUC5_BOVIN Laminin subunit alpha 1 OS=Bos ta	6	3	3	3	3	2	0	1	1	0	3	2	0	1	1	0	3	2	0	1	1	0	1.1	1.1	1.1	304.31	2784	2784;2792;3020;3032;2252;2311	1.86	5	2	0	20.558	By MS/MS	By MS/MS		By MS/MS	By MS/MS		1.1
A0A3Q1LWV8;A0A3Q1LUE9;G3X7I5;G3MZE0;A0A3Q1MWF5	A0A3Q1LWV8	0	Cytosolic	0	A0A3Q1LWV8;A0A3Q1LUE9	3;3;1;1;1	3;3;1;1;1	2;2;0;0;0	tr|A0A3Q1LWV8|A0A3Q1LWV8_BOVIN Ig-like domain-containing protein OS=Bos taurus OX=9913 PE=1 SV=1;tr|A0A3Q1LUE9|A0A3Q1LUE9_BOVIN Ig-like domain-containing protein OS=Bos taurus OX=9913 PE=1 SV=1	5	3	3	2	2	3	2	3	3	1	2	3	2	3	3	1	1	2	1	2	2	0	25	25	19.2	16.433	156	156;159;137;139;172	2.4	8	7	0	106.34	By MS/MS	By MS/MS	By MS/MS	By MS/MS	By MS/MS	By MS/MS	14.7
F1MKS3;A0A3Q1LUG9	F1MKS3	TXNDC5	Cytosolic	0	F1MKS3;A0A3Q1LUG9	1;1	1;1	1;1	tr|F1MKS3|F1MKS3_BOVIN Thioredoxin domain-containing protein OS=Bos taurus OX=9913 GN=TXNDC5 PE=1 SV=3;tr|A0A3Q1LUG9|A0A3Q1LUG9_BOVIN Uncharacterized protein OS=Bos taurus OX=9913 GN=TXNDC5 PE=1 SV=1	2	1	1	1	1	1	1	1	1	0	1	1	1	1	1	0	1	1	1	1	1	0	4.6	4.6	4.6	33.422	305	305;437	2	4	2	0	9.3891	By MS/MS	By MS/MS	By MS/MS	By MS/MS	By MS/MS		4.6
P81947;Q3ZCJ7;A0A452DJ66;Q32KN8;F2Z4K0;F2Z4C1;A0A452DIK7;A0A3Q1LUJ2;Q2HJ86;F6RP72;A0A3Q1M1Z2;A0A452DIH7;P81948;F1MNF8;A0A3Q1LQR2;Q2HJB8	P81947	0	Cytosolic	0	P81947;Q3ZCJ7;A0A452DJ66;Q32KN8;F2Z4K0;F2Z4C1;A0A452DIK7;A0A3Q1LUJ2;Q2HJ86;F6RP72;A0A3Q1M1Z2;A0A452DIH7;P81948;F1MNF8;A0A3Q1LQR2;Q2HJB8	2;2;2;2;2;2;2;2;2;2;1;1;1;1;1;1	2;2;2;2;2;2;2;2;2;2;1;1;1;1;1;1	2;2;2;2;2;2;2;2;2;2;1;1;1;1;1;1	sp|P81947|TBA1B_BOVIN Tubulin alpha-1B chain OS=Bos taurus OX=9913 PE=1 SV=2;sp|Q3ZCJ7|TBA1C_BOVIN Tubulin alpha-1C chain OS=Bos taurus OX=9913 GN=TUBA1C PE=1 SV=1;tr|A0A452DJ66|A0A452DJ66_BOVIN Tubulin alpha chain OS=Bos taurus OX=9913 GN=TUBA1D PE=3 SV=1	16	2	2	2	2	2	0	1	1	0	2	2	0	1	1	0	2	2	0	1	1	0	5.3	5.3	5.3	50.151	451	451;449;449;450;450;451;451;451;452;458;418;444;448;449;449;449	2	4	2	0	12.79	By MS/MS	By MS/MS		By MS/MS	By MS/MS		5.3
A0A3Q1LUN0	A0A3Q1LUN0	0	Cytosolic	0	A0A3Q1LUN0	1	1	1	tr|A0A3Q1LUN0|A0A3Q1LUN0_BOVIN GAGE domain-containing protein OS=Bos taurus OX=9913 PE=3 SV=1	1	1	1	1	1	1	0	1	1	0	1	1	0	1	1	0	1	1	0	1	1	0	10.4	10.4	10.4	12.914	115	115	2.8	2	3	0.0030675	6.6384	By MS/MS	By MS/MS		By MS/MS	By MS/MS		10.4
A0A3Q1LV05;A0A3Q1MQE0;Q3SZF2	A0A3Q1LV05	0	Cytosolic	0	A0A3Q1LV05;A0A3Q1MQE0;Q3SZF2	1;1;1	1;1;1	1;1;1	tr|A0A3Q1LV05|A0A3Q1LV05_BOVIN Uncharacterized protein OS=Bos taurus OX=9913 PE=3 SV=1;tr|A0A3Q1MQE0|A0A3Q1MQE0_BOVIN ADP-ribosylation factor 4 OS=Bos taurus OX=9913 GN=ARF4 PE=1 SV=1;sp|Q3SZF2|ARF4_BOVIN ADP-ribosylation factor 4 OS=Bos taurus OX=9913 GN=	3	1	1	1	1	1	1	0	0	0	1	1	1	0	0	0	1	1	1	0	0	0	6	6	6	19.128	166	166;179;180	1	4		0	24.603	By MS/MS	By MS/MS	By MS/MS				6
E1BHN4;A0A3Q1MC10;A0A3Q1LV49	E1BHN4	LOC509283	Cytosolic	0	E1BHN4;A0A3Q1MC10;A0A3Q1LV49	1;1;1	1;1;1	1;1;1	tr|E1BHN4|E1BHN4_BOVIN RING-type domain-containing protein OS=Bos taurus OX=9913 GN=LOC509283 PE=4 SV=3;tr|A0A3Q1MC10|A0A3Q1MC10_BOVIN RING-type domain-containing protein OS=Bos taurus OX=9913 GN=LOC509283 PE=4 SV=1;tr|A0A3Q1LV49|A0A3Q1LV49_BOVIN RING-type	3	1	1	1	1	1	0	0	0	0	1	1	0	0	0	0	1	1	0	0	0	0	0.2	0.2	0.2	571.45	5015	5015;5164;5201	1	2		0	7.8098	By MS/MS	By MS/MS					0.2
P31976;A0A3Q1LVC7	P31976	EZR VIL2	Cytosolic	0	P31976;A0A3Q1LVC7	2;2	2;2	2;2	sp|P31976|EZRI_BOVIN Ezrin OS=Bos taurus OX=9913 GN=EZR PE=1 SV=2;tr|A0A3Q1LVC7|A0A3Q1LVC7_BOVIN Ezrin OS=Bos taurus OX=9913 GN=EZR PE=1 SV=1	2	2	2	2	2	2	1	1	1	0	2	2	1	1	1	0	2	2	1	1	1	0	3.4	3.4	3.4	68.759	581	581;670	1.86	5	2	0	11.673	By MS/MS	By MS/MS	By MS/MS	By MS/MS	By MS/MS		3.4
A0A3Q1LVP7;F1N725	A0A3Q1LVP7	LMLN	Membrane	0	A0A3Q1LVP7;F1N725	1;1	1;1	1;1	tr|A0A3Q1LVP7|A0A3Q1LVP7_BOVIN Leishmanolysin-like peptidase OS=Bos taurus OX=9913 GN=LMLN PE=3 SV=1;tr|F1N725|F1N725_BOVIN Leishmanolysin-like peptidase OS=Bos taurus OX=9913 GN=LMLN PE=3 SV=3	2	1	1	1	0	0	1	0	0	0	0	0	1	0	0	0	0	0	1	0	0	0	1.5	1.5	1.5	75.197	662	662;693	1	1		1	-2			By MS/MS				0
P02672;CON__P02672;A0A3Q1LVV7;F6QND5	P02672	FGA	Core Matrisome	ECM Glycoproteins	P02672;CON__P02672;A0A3Q1LVV7;F6QND5	1;1;1;1	1;1;1;1	1;1;1;1	sp|P02672|FIBA_BOVIN Fibrinogen alpha chain OS=Bos taurus OX=9913 GN=FGA PE=1 SV=5;;tr|A0A3Q1LVV7|A0A3Q1LVV7_BOVIN Fibrinogen alpha chain OS=Bos taurus OX=9913 GN=FGA PE=4 SV=1;tr|F6QND5|F6QND5_BOVIN Fibrinogen alpha chain OS=Bos taurus OX=9913 GN=FGA PE=4	4	1	1	1	1	1	0	0	0	0	1	1	0	0	0	0	1	1	0	0	0	0	2.6	2.6	2.6	67.011	615	615;615;818;863	1	2		0	6.93	By MS/MS	By MS/MS					2.6
Q3SZW0;A0A3Q1LWL7;Q8HYJ9	Q3SZW0	FMO3	Membrane	0	Q3SZW0;A0A3Q1LWL7;Q8HYJ9	1;1;1	1;1;1	1;1;1	tr|Q3SZW0|Q3SZW0_BOVIN Flavin-containing monooxygenase OS=Bos taurus OX=9913 GN=FMO3 PE=1 SV=1;tr|A0A3Q1LWL7|A0A3Q1LWL7_BOVIN Dimethylaniline monooxygenase [N-oxide-forming] OS=Bos taurus OX=9913 GN=FMO3 PE=1 SV=1;sp|Q8HYJ9|FMO3_BOVIN Dimethylaniline monoo	3	1	1	1	0	0	0	0	0	1	0	0	0	0	0	1	0	0	0	0	0	1	2.1	2.1	2.1	48.534	429	429;495;532	4		1	0.0051151	6.1842						By MS/MS	0
Q2KIK0;A0A452DHZ1;A0A3Q1LWL8	Q2KIK0	SUGT1	Nuclear	0	Q2KIK0;A0A452DHZ1;A0A3Q1LWL8	2;2;2	2;2;2	2;2;2	sp|Q2KIK0|SGT1_BOVIN Protein SGT1 homolog OS=Bos taurus OX=9913 GN=SUGT1 PE=2 SV=1;tr|A0A452DHZ1|A0A452DHZ1_BOVIN Protein SGT1 homolog OS=Bos taurus OX=9913 GN=SUGT1 PE=3 SV=1;tr|A0A3Q1LWL8|A0A3Q1LWL8_BOVIN Protein SGT1 homolog OS=Bos taurus OX=9913 GN=SUG	3	2	2	2	2	2	2	2	2	0	2	2	2	2	2	0	2	2	2	2	2	0	6.8	6.8	6.8	38.074	338	338;338;338	2.2	6	4	0	12.755	By MS/MS	By MS/MS	By MS/MS	By MS/MS	By MS/MS		6.8
A0A3Q1LWY3;A2VDN5;A0A3Q1MRP0	A0A3Q1LWY3	SPAST SPG4	Cytosolic	0	A0A3Q1LWY3;A2VDN5;A0A3Q1MRP0	1;1;1	1;1;1	1;1;1	tr|A0A3Q1LWY3|A0A3Q1LWY3_BOVIN Spastin OS=Bos taurus OX=9913 GN=SPAST PE=3 SV=1;sp|A2VDN5|SPAST_BOVIN Spastin OS=Bos taurus OX=9913 GN=SPAST PE=2 SV=1;tr|A0A3Q1MRP0|A0A3Q1MRP0_BOVIN Spastin OS=Bos taurus OX=9913 GN=SPAST PE=3 SV=1	3	1	1	1	0	0	1	0	0	0	0	0	1	0	0	0	0	0	1	0	0	0	1.5	1.5	1.5	63.603	582	582;614;614	1	1		0.0099502	6.1466			By MS/MS				0
A0A3Q1LXF9	A0A3Q1LXF9	MYLK4	Cytosolic	0	A0A3Q1LXF9	1	1	1	tr|A0A3Q1LXF9|A0A3Q1LXF9_BOVIN Myosin light chain kinase family member 4 OS=Bos taurus OX=9913 GN=MYLK4 PE=3 SV=1	1	1	1	1	1	1	1	1	1	0	1	1	1	1	1	0	1	1	1	1	1	0	2.4	2.4	2.4	42.022	368	368	1.92	9	4	0.0029155	6.5174	By MS/MS	By MS/MS	By MS/MS	By MS/MS	By MS/MS		2.4
A0A3Q1MUA3;F1MUC5;A0A3Q1M4P8;A0A3Q1LXM2;A0A3Q1M0N0	A0A3Q1MUA3	COL15A1	Core Matrisome	Collagens	A0A3Q1MUA3;F1MUC5;A0A3Q1M4P8;A0A3Q1LXM2;A0A3Q1M0N0	4;4;4;4;4	4;4;4;4;4	4;4;4;4;4	tr|A0A3Q1MUA3|A0A3Q1MUA3_BOVIN Collagen type XV alpha 1 chain OS=Bos taurus OX=9913 GN=COL15A1 PE=4 SV=1;tr|F1MUC5|F1MUC5_BOVIN Collagen type XV alpha 1 chain OS=Bos taurus OX=9913 GN=COL15A1 PE=4 SV=3;tr|A0A3Q1M4P8|A0A3Q1M4P8_BOVIN Collagen type XV alpha	5	4	4	4	4	2	2	4	4	0	4	2	2	4	4	0	4	2	2	4	4	0	5.5	5.5	5.5	137.51	1350	1350;1372;1385;1386;1398	2.5	8	8	0	91.108	By MS/MS	By MS/MS	By MS/MS	By MS/MS	By MS/MS		5.5
P62326;A0A3Q1LXR1;G8JKY5;A0A3Q1MS48;A0A3Q1MJ46	P62326	TMSB4 THYB4	Cytosolic	0	P62326;A0A3Q1LXR1;G8JKY5;A0A3Q1MS48;A0A3Q1MJ46	1;1;1;1;1	1;1;1;1;1	1;1;1;1;1	sp|P62326|TYB4_BOVIN Thymosin beta-4 OS=Bos taurus OX=9913 GN=TMSB4 PE=1 SV=2;tr|A0A3Q1LXR1|A0A3Q1LXR1_BOVIN Thymosin beta OS=Bos taurus OX=9913 GN=TMSB4 PE=3 SV=1;tr|G8JKY5|G8JKY5_BOVIN Thymosin beta OS=Bos taurus OX=9913 GN=TMSB4X PE=3 SV=2;tr|A0A3Q1MS48	5	1	1	1	1	1	0	1	1	0	1	1	0	1	1	0	1	1	0	1	1	0	29.5	29.5	29.5	5.0526	44	44;44;50;72;73	2.5	2	2	0	6.7236	By MS/MS	By MS/MS		By MS/MS	By MS/MS		29.5
A0A3Q1MA31;A0A3Q1LZ09;Q3T052;F1MMD7;CON__Q3T052;A0A3Q1MGQ6	A0A3Q1MA31	ITIH4	Matrisome Associated	ECM Regulators	A0A3Q1MA31;A0A3Q1LZ09;Q3T052;F1MMD7;CON__Q3T052;A0A3Q1MGQ6	6;6;6;6;6;4	6;6;6;6;6;4	6;6;6;6;6;4	tr|A0A3Q1MA31|A0A3Q1MA31_BOVIN Inter-alpha-trypsin inhibitor heavy chain H4 OS=Bos taurus OX=9913 GN=ITIH4 PE=3 SV=1;tr|A0A3Q1LZ09|A0A3Q1LZ09_BOVIN Inter-alpha-trypsin inhibitor heavy chain H4 OS=Bos taurus OX=9913 GN=ITIH4 PE=3 SV=1;sp|Q3T052|ITIH4_BOVIN	6	6	6	6	6	5	5	5	5	3	6	5	5	5	5	3	6	5	5	5	5	3	7.7	7.7	7.7	99.645	899	899;910;916;916;916;937	2.5	19	19	0	137.22	By MS/MS	By MS/MS	By MS/MS	By MS/MS	By MS/MS	By MS/MS	7.7
A0A3Q1LZF2;F1MSA6;A0A3Q1M0N5	A0A3Q1LZF2	KRT34	Cytoskeletal	0	A0A3Q1LZF2;F1MSA6;A0A3Q1M0N5	13;13;11	2;2;2	2;2;2	tr|A0A3Q1LZF2|A0A3Q1LZF2_BOVIN Keratin 34 OS=Bos taurus OX=9913 GN=KRT34 PE=3 SV=1;tr|F1MSA6|F1MSA6_BOVIN Keratin 34 OS=Bos taurus OX=9913 GN=KRT34 PE=3 SV=1;tr|A0A3Q1M0N5|A0A3Q1M0N5_BOVIN Keratin 34 OS=Bos taurus OX=9913 GN=KRT34 PE=3 SV=1	3	13	2	2	0	0	0	2	2	13	0	0	0	0	0	2	0	0	0	0	0	2	26.2	4.8	4.8	44.992	393	393;391;366	4		2	0	35.891				By matching	By matching	By MS/MS	0
A0A3Q1LZM0;F1MD22	A0A3Q1LZM0	PTPRU	Membrane	0	A0A3Q1LZM0;F1MD22	1;1	1;1	1;1	tr|A0A3Q1LZM0|A0A3Q1LZM0_BOVIN Protein-tyrosine-phosphatase OS=Bos taurus OX=9913 GN=PTPRU PE=3 SV=1;tr|F1MD22|F1MD22_BOVIN Protein-tyrosine-phosphatase OS=Bos taurus OX=9913 GN=PTPRU PE=3 SV=2	2	1	1	1	1	1	1	0	0	0	1	1	1	0	0	0	1	1	1	0	0	0	0.5	0.5	0.5	161.02	1436	1436;1446	1	3		1	-2	By MS/MS	By matching	By matching				0.5
A0A3Q1NA44;A0A3Q1LZN8;P02465	A0A3Q1NA44	COL1A2	Core Matrisome	Collagens	A0A3Q1NA44;A0A3Q1LZN8;P02465	17;17;17	17;17;17	17;17;17	tr|A0A3Q1NA44|A0A3Q1NA44_BOVIN Collagen alpha-2(I) chain OS=Bos taurus OX=9913 GN=COL1A2 PE=1 SV=1;tr|A0A3Q1LZN8|A0A3Q1LZN8_BOVIN Collagen alpha-2(I) chain OS=Bos taurus OX=9913 GN=COL1A2 PE=1 SV=1;sp|P02465|CO1A2_BOVIN Collagen alpha-2(I) chain OS=Bos tau	3	17	17	17	14	13	12	14	12	6	14	13	12	14	12	6	14	13	12	14	12	6	21.7	21.7	21.7	118.06	1248	1248;1274;1364	2.38	40	34	0	233.51	By MS/MS	By MS/MS	By MS/MS	By MS/MS	By MS/MS	By MS/MS	18.5
Q08E18;Q9XSK7;A0A3Q1M0D3	Q08E18	HDGF	Nuclear	0	Q08E18;Q9XSK7;A0A3Q1M0D3	1;1;1	1;1;1	1;1;1	tr|Q08E18|Q08E18_BOVIN HDGF protein OS=Bos taurus OX=9913 GN=HDGF PE=1 SV=1;sp|Q9XSK7|HDGF_BOVIN Hepatoma-derived growth factor OS=Bos taurus OX=9913 GN=HDGF PE=2 SV=1;tr|A0A3Q1M0D3|A0A3Q1M0D3_BOVIN Hepatoma-derived growth factor OS=Bos taurus OX=9913 GN=H	3	1	1	1	1	1	0	0	0	0	1	1	0	0	0	0	1	1	0	0	0	0	4.2	4.2	4.2	26.56	238	238;239;240	1	2		0.0098765	6.1404	By MS/MS	By MS/MS					4.2
A0A3Q1M139;A5PJJ1;A0A3Q1MPF8;E1BFG1	A0A3Q1M139	KRT33B	Cytoskeletal	0	A0A3Q1M139;A5PJJ1;A0A3Q1MPF8	16;11;11;2	7;4;4;0	4;1;1;0	tr|A0A3Q1M139|A0A3Q1M139_BOVIN Keratin 33B OS=Bos taurus OX=9913 GN=KRT33B PE=3 SV=1;tr|A5PJJ1|A5PJJ1_BOVIN KRT33A protein OS=Bos taurus OX=9913 GN=KRT33A PE=2 SV=1;tr|A0A3Q1MPF8|A0A3Q1MPF8_BOVIN Keratin 33A OS=Bos taurus OX=9913 GN=KRT33A PE=3 SV=1	4	16	7	4	0	0	0	2	2	16	0	0	0	0	0	7	0	0	0	0	0	4	34.2	15.2	9	46.332	409	409;401;413;432	4		12	0	323.31				By matching	By matching	By MS/MS	0
A0A3Q1M1M7;Q8SPJ1	A0A3Q1M1M7	JUP	Cytoskeletal	0	A0A3Q1M1M7;Q8SPJ1	2;2	2;2	2;2	tr|A0A3Q1M1M7|A0A3Q1M1M7_BOVIN Junction plakoglobin OS=Bos taurus OX=9913 GN=JUP PE=1 SV=1;sp|Q8SPJ1|PLAK_BOVIN Junction plakoglobin OS=Bos taurus OX=9913 GN=JUP PE=2 SV=1	2	2	2	2	0	0	0	0	0	2	0	0	0	0	0	2	0	0	0	0	0	2	3.8	3.8	3.8	81.357	741	741;745	4		2	0	12.5						By MS/MS	0
A0A3Q1M1Z1;A0A3Q1MDT7;A0A3Q1MJQ1;G3N081;A0A3Q1LM20;A0A3Q1MH02;E1BBP7;A0A3Q1MFY5;A0A452DJ40;A0A452DJ35;A0A3Q1NHG3;A0A3Q1MEY7;G3N2B8;A0A452DJB2;A0A3Q1N666;E1BLC2;A0A3Q1M8Q4;A0A452DJJ1	A0A3Q1M1Z1	0	Cytosolic	0	A0A3Q1M1Z1;A0A3Q1MDT7;A0A3Q1MJQ1;G3N081;A0A3Q1LM20;A0A3Q1MH02;E1BBP7;A0A3Q1MFY5;A0A452DJ40;A0A452DJ35;A0A3Q1NHG3;A0A3Q1MEY7;G3N2B8;A0A452DJB2;A0A3Q1N666;E1BLC2;A0A3Q1M8Q4;A0A452DJJ1	7;7;6;6;6;6;6;5;5;5;5;5;5;5;5;5;5;5	1;1;0;0;0;0;0;0;0;0;0;0;0;0;0;0;0;0	1;1;0;0;0;0;0;0;0;0;0;0;0;0;0;0;0;0	tr|A0A3Q1M1Z1|A0A3Q1M1Z1_BOVIN Histone H4 OS=Bos taurus OX=9913 PE=3 SV=1;tr|A0A3Q1MDT7|A0A3Q1MDT7_BOVIN Histone H4 OS=Bos taurus OX=9913 PE=3 SV=1;tr|A0A3Q1MJQ1|A0A3Q1MJQ1_BOVIN Histone H4 OS=Bos taurus OX=9913 GN=LOC115945178 PE=3 SV=1;tr|G3N081|G3N081_B	18	7	1	1	5	5	3	5	5	3	1	1	0	0	0	0	1	1	0	0	0	0	39.7	5.9	5.9	14.944	136	136;136;149;98;136;136;115;110;114;89;93;109;103;102;101;97;96;109	1	2		0.002994	6.5692	By MS/MS	By MS/MS	By matching	By matching	By matching	By matching	39
A0A3Q1M213;A0A3Q1MV26;A4FUB0	A0A3Q1M213	C20H5orf34	Cytosolic	0	A0A3Q1M213;A0A3Q1MV26;A4FUB0	1;1;1	1;1;1	1;1;1	tr|A0A3Q1M213|A0A3Q1M213_BOVIN Chromosome 20 C5orf34 homolog OS=Bos taurus OX=9913 GN=C20H5orf34 PE=4 SV=1;tr|A0A3Q1MV26|A0A3Q1MV26_BOVIN Chromosome 20 C5orf34 homolog OS=Bos taurus OX=9913 GN=C20H5orf34 PE=4 SV=1;sp|A4FUB0|CE034_BOVIN Uncharacterized prot	3	1	1	1	1	1	0	0	0	0	1	1	0	0	0	0	1	1	0	0	0	0	1.5	1.5	1.5	68.626	604	604;608;638	1	2		1	-2	By MS/MS	By MS/MS					1.5
F1MRM4;A0A3Q1M8P1;A0A3Q1M2I9;A0A3Q1NMN6	F1MRM4	0	Cytosolic	0	F1MRM4;A0A3Q1M8P1;A0A3Q1M2I9;A0A3Q1NMN6	1;1;1;1	1;1;1;1	1;1;1;1	tr|F1MRM4|F1MRM4_BOVIN Uncharacterized protein OS=Bos taurus OX=9913 PE=3 SV=3;tr|A0A3Q1M8P1|A0A3Q1M8P1_BOVIN Uncharacterized protein OS=Bos taurus OX=9913 PE=3 SV=1;tr|A0A3Q1M2I9|A0A3Q1M2I9_BOVIN Uncharacterized protein OS=Bos taurus OX=9913 PE=3 SV=1;tr|	4	1	1	1	0	0	1	0	0	0	0	0	1	0	0	0	0	0	1	0	0	0	1.7	1.7	1.7	53.787	479	479;482;482;484	1	1		1	-2			By MS/MS				0
Q3Y4E1;A0A3Q1M2M3	Q3Y4E1	ZNF148 ZBP89	Cytosolic	0	Q3Y4E1;A0A3Q1M2M3	1;1	1;1	1;1	sp|Q3Y4E1|ZN148_BOVIN Zinc finger protein 148 OS=Bos taurus OX=9913 GN=ZNF148 PE=2 SV=1;tr|A0A3Q1M2M3|A0A3Q1M2M3_BOVIN Zinc finger protein 148 OS=Bos taurus OX=9913 GN=ZNF148 PE=4 SV=1	2	1	1	1	0	0	1	0	0	1	0	0	1	0	0	1	0	0	1	0	0	1	1.6	1.6	1.6	89.002	794	794;794	2	2	1	0	6.7161			By MS/MS			By MS/MS	0
P05689;A0A3Q1M2V6	P05689	CTSZ	Matrisome Associated	ECM Regulators	P05689;A0A3Q1M2V6	1;1	1;1	1;1	sp|P05689|CATZ_BOVIN Cathepsin Z OS=Bos taurus OX=9913 GN=CTSZ PE=2 SV=2;tr|A0A3Q1M2V6|A0A3Q1M2V6_BOVIN Cathepsin Z OS=Bos taurus OX=9913 GN=CTSZ PE=1 SV=1	2	1	1	1	1	1	1	1	1	0	1	1	1	1	1	0	1	1	1	1	1	0	3.3	3.3	3.3	33.886	304	304;318	2.2	3	2	0.0052632	6.2589	By MS/MS	By MS/MS	By MS/MS	By MS/MS	By MS/MS		3.3
A0A3Q1MU17;A0A3Q1MC97;A0A3Q1M685;Q3T074;A0A3Q1M3B5	A0A3Q1MU17	ART3	Membrane	0	A0A3Q1MU17;A0A3Q1MC97;A0A3Q1M685;Q3T074;A0A3Q1M3B5	4;4;4;4;4	4;4;4;4;4	4;4;4;4;4	tr|A0A3Q1MU17|A0A3Q1MU17_BOVIN NAD(P)(+)--arginine ADP-ribosyltransferase OS=Bos taurus OX=9913 GN=ART3 PE=3 SV=1;tr|A0A3Q1MC97|A0A3Q1MC97_BOVIN NAD(P)(+)--arginine ADP-ribosyltransferase OS=Bos taurus OX=9913 GN=ART3 PE=3 SV=1;tr|A0A3Q1M685|A0A3Q1M685_BOV	5	4	4	4	1	1	0	4	4	0	1	1	0	4	4	0	1	1	0	4	4	0	12.3	12.3	12.3	40.948	358	358;384;386;390;395	3.4	2	8	0	25.056	By MS/MS	By MS/MS		By MS/MS	By MS/MS		4.5
A0A3Q1M3H5;A0A3Q1MRL3	A0A3Q1M3H5	0	Cytosolic	0	A0A3Q1M3H5;A0A3Q1MRL3	1;1	1;1	1;1	tr|A0A3Q1M3H5|A0A3Q1M3H5_BOVIN Smg4_UPF3 domain-containing protein OS=Bos taurus OX=9913 PE=3 SV=1;tr|A0A3Q1MRL3|A0A3Q1MRL3_BOVIN Smg4_UPF3 domain-containing protein OS=Bos taurus OX=9913 PE=3 SV=1	2	1	1	1	1	0	1	0	0	0	1	0	1	0	0	0	1	0	1	0	0	0	6.7	6.7	6.7	11.303	104	104;220	1	2		1	-2	By MS/MS		By matching				6.7
A0A3Q1M3L6	A0A3Q1M3L6	0	Cytosolic	0	A0A3Q1M3L6	9	1	0	tr|A0A3Q1M3L6|A0A3Q1M3L6_BOVIN Uncharacterized protein OS=Bos taurus OX=9913 PE=1 SV=1	1	9	1	0	6	7	4	7	6	1	1	1	1	0	0	0	0	0	0	0	0	0	28.3	3.8	0	40.475	367	367	1	3		0	12.986	By MS/MS	By MS/MS	By MS/MS	By matching	By matching	By matching	21.8
A0A3Q1M3Q7;Q29RV1;F1MEN8	A0A3Q1M3Q7	PDIA4	Cytosolic	0	A0A3Q1M3Q7;Q29RV1;F1MEN8	1;1;1	1;1;1	1;1;1	tr|A0A3Q1M3Q7|A0A3Q1M3Q7_BOVIN Protein disulfide-isomerase A4 OS=Bos taurus OX=9913 GN=PDIA4 PE=3 SV=1;sp|Q29RV1|PDIA4_BOVIN Protein disulfide-isomerase A4 OS=Bos taurus OX=9913 GN=PDIA4 PE=2 SV=1;tr|F1MEN8|F1MEN8_BOVIN Protein disulfide-isomerase A4 OS=Bo	3	1	1	1	1	1	1	1	1	0	1	1	1	1	1	0	1	1	1	1	1	0	1.9	1.9	1.9	71.9	637	637;643;643	2.2	3	2	0	7.9044	By MS/MS	By MS/MS	By MS/MS	By MS/MS	By MS/MS		1.9
A0A3Q1M3U1	A0A3Q1M3U1	DMC1	Nuclear	0	A0A3Q1M3U1	1	1	1	tr|A0A3Q1M3U1|A0A3Q1M3U1_BOVIN DNA meiotic recombinase 1 OS=Bos taurus OX=9913 GN=DMC1 PE=3 SV=1	1	1	1	1	0	1	0	0	0	0	0	1	0	0	0	0	0	1	0	0	0	0	2.7	2.7	2.7	29.584	264	264	1	1		1	-2		By MS/MS					0
F1MMR6;A0A3Q1M3Z5;P80209	F1MMR6	CTSD	Matrisome Associated	ECM Regulators	F1MMR6;A0A3Q1M3Z5;P80209	8;8;7	8;8;7	8;8;7	tr|F1MMR6|F1MMR6_BOVIN Cathepsin D OS=Bos taurus OX=9913 GN=CTSD PE=3 SV=1;tr|A0A3Q1M3Z5|A0A3Q1M3Z5_BOVIN Cathepsin D OS=Bos taurus OX=9913 GN=CTSD PE=3 SV=1;sp|P80209|CATD_BOVIN Cathepsin D OS=Bos taurus OX=9913 GN=CTSD PE=1 SV=2	3	8	8	8	7	5	6	4	5	1	7	5	6	4	5	1	7	5	6	4	5	1	26	26	26	44.704	412	412;391;390	2.03	19	10	0	91.472	By MS/MS	By MS/MS	By MS/MS	By MS/MS	By MS/MS	By matching	24
A7YW22;A0A3Q1M4F2	A7YW22	JAM3	Membrane	0	A7YW22;A0A3Q1M4F2	1;1	1;1	1;1	tr|A7YW22|A7YW22_BOVIN JAM3 protein OS=Bos taurus OX=9913 GN=JAM3 PE=2 SV=1;tr|A0A3Q1M4F2|A0A3Q1M4F2_BOVIN Junctional adhesion molecule 3 OS=Bos taurus OX=9913 GN=JAM3 PE=4 SV=1	2	1	1	1	1	1	1	0	0	0	1	1	1	0	0	0	1	1	1	0	0	0	3.3	3.3	3.3	33.824	302	302;303	1	3		0.0098522	6.137	By MS/MS	By MS/MS	By matching				3.3
F1MJ66;A0A3Q1M4F4;CON__Q99456	F1MJ66	KRT12	Cytoskeletal	0	F1MJ66;A0A3Q1M4F4	3;3;1	1;1;1	1;1;1	tr|F1MJ66|F1MJ66_BOVIN Keratin 12 OS=Bos taurus OX=9913 GN=KRT12 PE=3 SV=3;tr|A0A3Q1M4F4|A0A3Q1M4F4_BOVIN Keratin 12 OS=Bos taurus OX=9913 GN=KRT12 PE=3 SV=1	3	3	1	1	1	0	1	2	2	3	0	0	0	0	0	1	0	0	0	0	0	1	6	2.6	2.6	50.394	470	470;494;494	4		1	0.010025	6.1502	By matching		By matching	By matching	By matching	By MS/MS	1.9
A0A3Q1M4G0	A0A3Q1M4G0	FOXG1	Nuclear	0	A0A3Q1M4G0	1	1	1	tr|A0A3Q1M4G0|A0A3Q1M4G0_BOVIN Fork-head domain-containing protein OS=Bos taurus OX=9913 GN=FOXG1 PE=4 SV=1	1	1	1	1	0	0	0	0	0	1	0	0	0	0	0	1	0	0	0	0	0	1	1.4	1.4	1.4	52.419	490	490	4		1	1	-2						By MS/MS	0
A0A3Q1M4K0;F1MDT8;A0A3Q1MJ95	A0A3Q1M4K0	SETD2	Nuclear	0	A0A3Q1M4K0;F1MDT8;A0A3Q1MJ95	1;1;1	1;1;1	1;1;1	tr|A0A3Q1M4K0|A0A3Q1M4K0_BOVIN SET domain-containing protein 2 OS=Bos taurus OX=9913 GN=SETD2 PE=4 SV=1;tr|F1MDT8|F1MDT8_BOVIN SET domain-containing protein 2 OS=Bos taurus OX=9913 GN=SETD2 PE=4 SV=3;tr|A0A3Q1MJ95|A0A3Q1MJ95_BOVIN SET domain-containing pro	3	1	1	1	1	0	1	0	0	0	1	0	1	0	0	0	1	0	1	0	0	0	0.6	0.6	0.6	260.04	2312	2312;2539;2541	1	2		1	-2	By MS/MS		By MS/MS				0.6
A0A3Q1M4L6;F2Z4F9;G3N080;Q32S29;Q2M2T1;Q32L48;P62808;A0A3Q1MEU7;A0A452DJK3;F2Z4E8;Q2KII5;A0A3Q1MBN5;G3MWH4;G5E6I9;G8JL06;G3N1R5;G3MZR4;E1BPK0;A0A3Q1M071;G3N011;E1B7N8;E1BM22;G3N3L9;G3N0L9;E1B8G9;E1BDE9;G3N0M9;G3MXG7;F1MUU9;G3MXG1;A0A3Q1MQN3;A6QQ28	A0A3Q1M4L6	H2BC14	Cytosolic	0	A0A3Q1M4L6;F2Z4F9;G3N080;Q32S29;Q2M2T1;Q32L48;P62808;A0A3Q1MEU7;A0A452DJK3;F2Z4E8;Q2KII5;A0A3Q1MBN5;G3MWH4;G5E6I9;G8JL06;G3N1R5;G3MZR4;E1BPK0;A0A3Q1M071;G3N011;E1B7N8;E1BM22;G3N3L9;G3N0L9;E1B8G9;E1BDE9;G3N0M9;G3MXG7;F1MUU9;G3MXG1;A0A3Q1MQN3;A6QQ28	2;2;2;2;2;2;2;2;2;2;2;2;2;2;2;2;2;1;1;1;1;1;1;1;1;1;1;1;1;1;1;1	2;2;2;2;2;2;2;2;2;2;2;2;2;2;2;2;2;1;1;1;1;1;1;1;1;1;1;1;1;1;1;1	2;2;2;2;2;2;2;2;2;2;2;2;2;2;2;2;2;1;1;1;1;1;1;1;1;1;1;1;1;1;1;1	tr|A0A3Q1M4L6|A0A3Q1M4L6_BOVIN H2B clustered histone 14 OS=Bos taurus OX=9913 GN=H2BC14 PE=3 SV=1;tr|F2Z4F9|F2Z4F9_BOVIN Histone H2B OS=Bos taurus OX=9913 GN=H2BC12 PE=3 SV=1;tr|G3N080|G3N080_BOVIN Histone H2B OS=Bos taurus OX=9913 PE=3 SV=2;tr|Q32S29|Q32S	32	2	2	2	2	2	1	1	1	0	2	2	1	1	1	0	2	2	1	1	1	0	11.7	11.7	11.7	17.089	154	154;126;137;126;126;126;126;126;126;126;126;126;126;126;126;125;126;126;67;134;131;126;126;126;126;126;120;126;125;125;67;67	2.09	7	4	0	12.89	By MS/MS	By MS/MS	By MS/MS	By MS/MS	By MS/MS		11.7
A0A3Q1M544	A0A3Q1M544	PEMT	Membrane	0	A0A3Q1M544	1	1	1	tr|A0A3Q1M544|A0A3Q1M544_BOVIN Phosphatidylethanolamine N-methyltransferase OS=Bos taurus OX=9913 GN=PEMT PE=4 SV=1	1	1	1	1	0	0	0	1	0	0	0	0	0	1	0	0	0	0	0	1	0	0	2.5	2.5	2.5	36.958	355	355	4		1	0.0027473	6.3537				By MS/MS			0
Q5E9F8;P84227;P68432;G3N2P2;G3MYD7;G3MWX6;E1BGN3;A5PK61;A0A3Q1MPB8;A0A3Q1M588;A0A3Q1LMR9;Q3SZB8	Q5E9F8	H3-3A H3F3A; H3-3B H3F3B	Cytosolic	0	Q5E9F8;P84227;P68432;G3N2P2;G3MYD7;G3MWX6;E1BGN3;A5PK61;A0A3Q1MPB8;A0A3Q1M588;A0A3Q1LMR9;Q3SZB8	2;2;2;2;2;2;2;2;2;2;1;1	2;2;2;2;2;2;2;2;2;2;1;1	2;2;2;2;2;2;2;2;2;2;1;1	sp|Q5E9F8|H33_BOVIN Histone H3.3 OS=Bos taurus OX=9913 GN=H3-3A PE=1 SV=3;sp|P84227|H32_BOVIN Histone H3.2 OS=Bos taurus OX=9913 PE=1 SV=2;sp|P68432|H31_BOVIN Histone H3.1 OS=Bos taurus OX=9913 PE=1 SV=2;tr|G3N2P2|G3N2P2_BOVIN Histone domain-containing pro	12	2	2	2	0	0	1	1	1	1	0	0	1	1	1	1	0	0	1	1	1	1	11.8	11.8	11.8	15.328	136	136;136;136;136;136;136;136;136;136;136;136;136	3.25	1	3	0	12.248			By MS/MS	By MS/MS	By MS/MS	By MS/MS	0
A0A3Q1MNH8;A0A3Q1NNC7;A0A3Q1M5I0	A0A3Q1MNH8	SCAI	Nuclear	0	A0A3Q1MNH8;A0A3Q1NNC7;A0A3Q1M5I0	1;1;1	1;1;1	1;1;1	tr|A0A3Q1MNH8|A0A3Q1MNH8_BOVIN Uncharacterized protein OS=Bos taurus OX=9913 GN=SCAI PE=4 SV=1;tr|A0A3Q1NNC7|A0A3Q1NNC7_BOVIN Uncharacterized protein OS=Bos taurus OX=9913 GN=SCAI PE=4 SV=1;tr|A0A3Q1M5I0|A0A3Q1M5I0_BOVIN Uncharacterized protein OS=Bos taur	3	1	1	1	0	0	0	1	1	0	0	0	0	1	1	0	0	0	0	1	1	0	3	3	3	58.077	507	507;546;661	4		2	1	-2				By MS/MS	By MS/MS		0
A0A3Q1M6C2;O18963;G3X7D6	A0A3Q1M6C2	CYP2E1	Membrane	0	A0A3Q1M6C2;O18963;G3X7D6	2;2;2	2;2;2	2;2;2	tr|A0A3Q1M6C2|A0A3Q1M6C2_BOVIN 4-nitrophenol 2-hydroxylase OS=Bos taurus OX=9913 GN=CYP2E1 PE=3 SV=1;sp|O18963|CP2E1_BOVIN Cytochrome P450 2E1 OS=Bos taurus OX=9913 GN=CYP2E1 PE=2 SV=1;tr|G3X7D6|G3X7D6_BOVIN 4-nitrophenol 2-hydroxylase OS=Bos taurus OX=991	3	2	2	2	1	0	1	1	1	0	1	0	1	1	1	0	1	0	1	1	1	0	3.4	3.4	3.4	52.997	464	464;495;509	2.5	2	2	0	13.21	By MS/MS		By matching	By MS/MS	By MS/MS		1.7
F1N7F3;A0A3Q1M731;A0A3Q1MHB0	F1N7F3	EGFR	Nuclear	0	F1N7F3;A0A3Q1M731;A0A3Q1MHB0	3;3;3	3;3;3	3;3;3	tr|F1N7F3|F1N7F3_BOVIN Receptor protein-tyrosine kinase OS=Bos taurus OX=9913 GN=EGFR PE=4 SV=3;tr|A0A3Q1M731|A0A3Q1M731_BOVIN Receptor protein-tyrosine kinase OS=Bos taurus OX=9913 GN=EGFR PE=4 SV=1;tr|A0A3Q1MHB0|A0A3Q1MHB0_BOVIN Receptor protein-tyrosine	3	3	3	3	2	2	1	3	3	0	2	2	1	3	3	0	2	2	1	3	3	0	3.1	3.1	3.1	130.86	1179	1179;1203;1208	2.64	5	6	0	20.183	By MS/MS	By MS/MS	By MS/MS	By MS/MS	By MS/MS		2.3
A0A3Q1MXM4;F1MNQ3;A0A3Q1M7J1;A0A3Q1MV21;A0A3Q1MJV7;A0A3Q1MM26;A0A3Q1MC76;A0A3Q1MEA2;A0A3Q1MWN1;A0A3Q1MFJ1	A0A3Q1MXM4	DLG1	Cytoskeletal	0	A0A3Q1MXM4;F1MNQ3;A0A3Q1M7J1;A0A3Q1MV21;A0A3Q1MJV7;A0A3Q1MM26;A0A3Q1MC76;A0A3Q1MEA2;A0A3Q1MWN1;A0A3Q1MFJ1	1;1;1;1;1;1;1;1;1;1	1;1;1;1;1;1;1;1;1;1	1;1;1;1;1;1;1;1;1;1	tr|A0A3Q1MXM4|A0A3Q1MXM4_BOVIN Discs large MAGUK scaffold protein 1 OS=Bos taurus OX=9913 GN=DLG1 PE=4 SV=1;tr|F1MNQ3|F1MNQ3_BOVIN Discs large MAGUK scaffold protein 1 OS=Bos taurus OX=9913 GN=DLG1 PE=4 SV=3;tr|A0A3Q1M7J1|A0A3Q1M7J1_BOVIN Discs large MAGUK	10	1	1	1	0	1	1	1	1	0	0	1	1	1	1	0	0	1	1	1	1	0	1.5	1.5	1.5	86.383	779	779;784;805;840;869;870;876;879;888;906	2.5	2	2	0.0029674	6.55		By MS/MS	By MS/MS	By MS/MS	By MS/MS		0
A0A3Q1M858;G3MWX7	A0A3Q1M858	LOC100295548	Cytosolic	0	A0A3Q1M858;G3MWX7	2;1	2;1	2;1	tr|A0A3Q1M858|A0A3Q1M858_BOVIN Lipocln_cytosolic_FA-bd_dom domain-containing protein OS=Bos taurus OX=9913 GN=LOC100295548 PE=3 SV=1;tr|G3MWX7|G3MWX7_BOVIN Lipocln_cytosolic_FA-bd_dom domain-containing protein OS=Bos taurus OX=9913 GN=LOC100295548 PE=3 SV=	2	2	2	2	1	0	1	2	2	0	1	0	1	2	2	0	1	0	1	2	2	0	14.4	14.4	14.4	19.568	180	180;113	3	2	4	0	12.948	By MS/MS		By MS/MS	By MS/MS	By MS/MS		8.9
P10096;A0A3Q1M8J9	P10096	GAPDH GAPD	Cytosolic	0	P10096;A0A3Q1M8J9	1;1	1;1	1;1	sp|P10096|G3P_BOVIN Glyceraldehyde-3-phosphate dehydrogenase OS=Bos taurus OX=9913 GN=GAPDH PE=1 SV=4;tr|A0A3Q1M8J9|A0A3Q1M8J9_BOVIN Glyceraldehyde-3-phosphate dehydrogenase OS=Bos taurus OX=9913 GN=GAPDH PE=1 SV=1	2	1	1	1	1	1	0	0	0	0	1	1	0	0	0	0	1	1	0	0	0	0	4.5	4.5	4.5	35.868	333	333;376	1	2		0.0030303	6.6109	By MS/MS	By MS/MS					4.5
F1N1H5;A0A3Q1M8P0	F1N1H5	MCM10	Nuclear	0	F1N1H5;A0A3Q1M8P0	1;1	1;1	1;1	tr|F1N1H5|F1N1H5_BOVIN Protein MCM10 homolog OS=Bos taurus OX=9913 GN=MCM10 PE=3 SV=3;tr|A0A3Q1M8P0|A0A3Q1M8P0_BOVIN Protein MCM10 homolog OS=Bos taurus OX=9913 GN=MCM10 PE=3 SV=1	2	1	1	1	1	1	1	1	1	0	1	1	1	1	1	0	1	1	1	1	1	0	1.1	1.1	1.1	97.193	870	870;916	1.86	5	2	0.0028329	6.4307	By MS/MS	By MS/MS	By matching	By matching	By MS/MS		1.1
A0A3Q1M9G8;P61955;A0A3Q1M927;Q17QV3	A0A3Q1M9G8	0	Cytosolic	0	A0A3Q1M9G8;P61955;A0A3Q1M927;Q17QV3	1;1;1;1	1;1;1;1	1;1;1;1	tr|A0A3Q1M9G8|A0A3Q1M9G8_BOVIN Ubiquitin-like domain-containing protein OS=Bos taurus OX=9913 PE=4 SV=1;sp|P61955|SUMO2_BOVIN Small ubiquitin-related modifier 2 OS=Bos taurus OX=9913 GN=SUMO2 PE=3 SV=1;tr|A0A3Q1M927|A0A3Q1M927_BOVIN Small ubiquitin-related	4	1	1	1	1	1	1	1	1	0	1	1	1	1	1	0	1	1	1	1	1	0	13	13	13	10.628	92	92;95;95;104	1.86	5	2	0	30.932	By MS/MS	By MS/MS	By MS/MS	By MS/MS	By MS/MS		13
F1N415;A0A3Q1MR32;A0A3Q1M9D0	F1N415	PCLO	Cytoskeletal	0	F1N415;A0A3Q1MR32;A0A3Q1M9D0	1;1;1	1;1;1	1;1;1	tr|F1N415|F1N415_BOVIN Piccolo presynaptic cytomatrix protein OS=Bos taurus OX=9913 GN=PCLO PE=4 SV=3;tr|A0A3Q1MR32|A0A3Q1MR32_BOVIN Piccolo presynaptic cytomatrix protein OS=Bos taurus OX=9913 GN=PCLO PE=4 SV=1;tr|A0A3Q1M9D0|A0A3Q1M9D0_BOVIN Piccolo presy	3	1	1	1	0	0	0	1	0	0	0	0	0	1	0	0	0	0	0	1	0	0	0.2	0.2	0.2	562.03	5160	5160;5212;5221	4		1	0.010101	6.1556				By MS/MS			0
A0A3Q1M9V2	A0A3Q1M9V2	TBCD	Cytoskeletal	0	A0A3Q1M9V2	1	1	1	tr|A0A3Q1M9V2|A0A3Q1M9V2_BOVIN Tubulin-specific chaperone D OS=Bos taurus OX=9913 GN=TBCD PE=3 SV=1	1	1	1	1	0	0	0	1	1	0	0	0	0	1	1	0	0	0	0	1	1	0	1	1	1	158.96	1422	1422	4		2	1	-2				By MS/MS	By MS/MS		0
A0A3Q1MI51;A0A3Q1MA54;A0A3Q1MXZ6;A0A3Q1MBK2;E1B9T1	A0A3Q1MI51	PLXNB3	Matrisome Associated	ECM-affiliated Proteins	A0A3Q1MI51;A0A3Q1MA54;A0A3Q1MXZ6;A0A3Q1MBK2;E1B9T1	1;1;1;1;1	1;1;1;1;1	1;1;1;1;1	tr|A0A3Q1MI51|A0A3Q1MI51_BOVIN Plexin B3 OS=Bos taurus OX=9913 GN=PLXNB3 PE=3 SV=1;tr|A0A3Q1MA54|A0A3Q1MA54_BOVIN Plexin B3 OS=Bos taurus OX=9913 GN=PLXNB3 PE=3 SV=1;tr|A0A3Q1MXZ6|A0A3Q1MXZ6_BOVIN Plexin B3 OS=Bos taurus OX=9913 GN=PLXNB3 PE=3 SV=1;tr|A0A3	5	1	1	1	0	0	0	0	0	1	0	0	0	0	0	1	0	0	0	0	0	1	0.6	0.6	0.6	195.11	1789	1789;1797;1806;1905;1912	4		1	0	8.6562						By MS/MS	0
Q2TBU0;A0A3Q1MB98;G3X6K8	Q2TBU0	HP	Cytosolic	0	Q2TBU0;A0A3Q1MB98;G3X6K8	4;4;3	4;4;3	4;4;3	sp|Q2TBU0|HPT_BOVIN Haptoglobin OS=Bos taurus OX=9913 GN=HP PE=2 SV=1;tr|A0A3Q1MB98|A0A3Q1MB98_BOVIN Haptoglobin OS=Bos taurus OX=9913 GN=HP PE=3 SV=1;tr|G3X6K8|G3X6K8_BOVIN Haptoglobin OS=Bos taurus OX=9913 GN=HP PE=3 SV=2	3	4	4	4	2	3	2	2	2	2	2	3	2	2	2	2	2	3	2	2	2	2	10.7	10.7	10.7	44.859	401	401;390;376	2.38	7	6	0	24.986	By MS/MS	By MS/MS	By MS/MS	By MS/MS	By MS/MS	By MS/MS	5.7
A0A3Q1MBB3	A0A3Q1MBB3	EFCAB8	Cytosolic	0	A0A3Q1MBB3	1	1	1	tr|A0A3Q1MBB3|A0A3Q1MBB3_BOVIN Uncharacterized protein OS=Bos taurus OX=9913 GN=EFCAB8 PE=4 SV=1	1	1	1	1	0	0	0	0	0	1	0	0	0	0	0	1	0	0	0	0	0	1	0.8	0.8	0.8	139.84	1232	1232	4		1	1	-2						By MS/MS	0
A0A3Q1MVS0;Q5EAC5;A0A3Q1MBE0;Q3ZBC5	A0A3Q1MVS0	ZNF410	Cytosolic	0	A0A3Q1MVS0;Q5EAC5;A0A3Q1MBE0;Q3ZBC5	1;1;1;1	1;1;1;1	1;1;1;1	tr|A0A3Q1MVS0|A0A3Q1MVS0_BOVIN Zinc finger protein 410 OS=Bos taurus OX=9913 GN=ZNF410 PE=4 SV=1;sp|Q5EAC5|ZN410_BOVIN Zinc finger protein 410 OS=Bos taurus OX=9913 GN=ZNF410 PE=2 SV=1;tr|A0A3Q1MBE0|A0A3Q1MBE0_BOVIN Zinc finger protein 410 OS=Bos taurus OX	4	1	1	1	0	0	1	0	0	0	0	0	1	0	0	0	0	0	1	0	0	0	2.3	2.3	2.3	46.835	430	430;467;471;478	1	1		1	-2			By MS/MS				0
E1B748;A0A3Q1MBP1;A0A3Q1M930;A0A3Q1MJM1	E1B748	HYOU1	Cytosolic	0	E1B748;A0A3Q1MBP1;A0A3Q1M930;A0A3Q1MJM1	6;6;5;5	6;6;5;5	6;6;5;5	tr|E1B748|E1B748_BOVIN Hypoxia up-regulated 1 OS=Bos taurus OX=9913 GN=HYOU1 PE=1 SV=2;tr|A0A3Q1MBP1|A0A3Q1MBP1_BOVIN Hypoxia up-regulated 1 OS=Bos taurus OX=9913 GN=HYOU1 PE=1 SV=1;tr|A0A3Q1M930|A0A3Q1M930_BOVIN Hypoxia up-regulated 1 OS=Bos taurus OX=991	4	6	6	6	4	2	2	2	3	0	4	2	2	2	3	0	4	2	2	2	3	0	6.3	6.3	6.3	111.38	1000	1000;1001;974;1021	2.17	11	7	0	65.931	By MS/MS	By MS/MS	By MS/MS	By MS/MS	By MS/MS		6.1
A0A3Q1MBR7	A0A3Q1MBR7	NT5C3B	Cytosolic	0	A0A3Q1MBR7	1	1	1	tr|A0A3Q1MBR7|A0A3Q1MBR7_BOVIN 7-methylguanosine phosphate-specific 5-nucleotidase OS=Bos taurus OX=9913 GN=NT5C3B PE=3 SV=1	1	1	1	1	0	0	0	0	0	1	0	0	0	0	0	1	0	0	0	0	0	1	4.4	4.4	4.4	20.753	182	182	4		1	1	-2						By MS/MS	0
Q05927;A0A3Q1MCG3	Q05927	NT5E NT5 NTE	Cytosolic	0	Q05927;A0A3Q1MCG3	2;2	2;2	2;2	sp|Q05927|5NTD_BOVIN 5-nucleotidase OS=Bos taurus OX=9913 GN=NT5E PE=1 SV=2;tr|A0A3Q1MCG3|A0A3Q1MCG3_BOVIN Ecto-5-nucleotidase OS=Bos taurus OX=9913 GN=NT5E PE=3 SV=1	2	2	2	2	2	0	1	1	1	0	2	0	1	1	1	0	2	0	1	1	1	0	5.1	5.1	5.1	62.965	574	574;574	2.2	3	2	0	11.923	By MS/MS		By MS/MS	By MS/MS	By MS/MS		5.1
A0A3Q1MCJ7	A0A3Q1MCJ7	RPS14	Cytosolic	0	A0A3Q1MCJ7	1	1	1	tr|A0A3Q1MCJ7|A0A3Q1MCJ7_BOVIN Uncharacterized protein OS=Bos taurus OX=9913 GN=RPS14 PE=1 SV=1	1	1	1	1	0	1	1	1	1	0	0	1	1	1	1	0	0	1	1	1	1	0	8.6	8.6	8.6	16.273	151	151	2.5	2	2	0	6.8781		By MS/MS	By MS/MS	By MS/MS	By MS/MS		0
F1MT12;A0A3Q1NB59;A0A3Q1MDC6	F1MT12	NCSTN	Membrane	0	F1MT12;A0A3Q1NB59;A0A3Q1MDC6	1;1;1	1;1;1	1;1;1	tr|F1MT12|F1MT12_BOVIN Nicastrin OS=Bos taurus OX=9913 GN=NCSTN PE=1 SV=2;tr|A0A3Q1NB59|A0A3Q1NB59_BOVIN Nicastrin OS=Bos taurus OX=9913 GN=NCSTN PE=1 SV=1;tr|A0A3Q1MDC6|A0A3Q1MDC6_BOVIN Nicastrin OS=Bos taurus OX=9913 GN=NCSTN PE=1 SV=1	3	1	1	1	1	0	1	1	1	0	1	0	1	1	1	0	1	0	1	1	1	0	1.6	1.6	1.6	77.431	703	703;739;765	2.5	2	2	0.0028986	6.5056	By MS/MS		By MS/MS	By MS/MS	By MS/MS		1.6
A0A3Q1MSI8;E1BDF8;A0A3Q1ME34	A0A3Q1MSI8	REXO1	Nuclear	0	A0A3Q1MSI8;E1BDF8;A0A3Q1ME34	1;1;1	1;1;1	1;1;1	tr|A0A3Q1MSI8|A0A3Q1MSI8_BOVIN RNA exonuclease 1 homolog OS=Bos taurus OX=9913 GN=REXO1 PE=4 SV=1;tr|E1BDF8|E1BDF8_BOVIN RNA exonuclease 1 homolog OS=Bos taurus OX=9913 GN=REXO1 PE=4 SV=3;tr|A0A3Q1ME34|A0A3Q1ME34_BOVIN RNA exonuclease 1 homolog OS=Bos taur	3	1	1	1	1	0	0	0	0	0	1	0	0	0	0	0	1	0	0	0	0	0	0.7	0.7	0.7	125.91	1172	1172;1204;1207	1	1		1	-2	By MS/MS						0.7
A0A3Q1MR54;A0A3Q1NH68;F6R7W8;A0A3Q1ME55	A0A3Q1MR54	C8G	Cytosolic	0	A0A3Q1MR54;A0A3Q1NH68;F6R7W8;A0A3Q1ME55	1;1;1;1	1;1;1;1	1;1;1;1	tr|A0A3Q1MR54|A0A3Q1MR54_BOVIN Lipocln_cytosolic_FA-bd_dom domain-containing protein OS=Bos taurus OX=9913 GN=C8G PE=4 SV=1;tr|A0A3Q1NH68|A0A3Q1NH68_BOVIN Uncharacterized protein OS=Bos taurus OX=9913 GN=C8G PE=4 SV=1;tr|F6R7W8|F6R7W8_BOVIN Uncharacterized	4	1	1	1	1	1	1	1	1	0	1	1	1	1	1	0	1	1	1	1	1	0	5.3	5.3	5.3	30.533	281	281;327;442;481	2.2	3	2	0.0054496	6.3326	By MS/MS	By MS/MS	By matching	By MS/MS	By MS/MS		5.3
A0A3Q1MEE9	A0A3Q1MEE9	0	Cytosolic	0	A0A3Q1MEE9	1	1	1	tr|A0A3Q1MEE9|A0A3Q1MEE9_BOVIN DUF4749 domain-containing protein OS=Bos taurus OX=9913 PE=4 SV=1	1	1	1	1	0	0	1	0	0	0	0	0	1	0	0	0	0	0	1	0	0	0	13.9	13.9	13.9	7.96	72	72	1	1		1	-2			By MS/MS				0
G3X807;P62803;A0A3Q1MEZ8;E1B9M9;A0A3Q1LMV7;G3MYX0;E1B7N2	G3X807	H4C9	Cytosolic	0	G3X807;P62803;A0A3Q1MEZ8;E1B9M9;A0A3Q1LMV7;G3MYX0;E1B7N2	7;7;7;6;6;5;5	7;7;7;6;6;5;5	1;1;1;1;1;1;1	tr|G3X807|G3X807_BOVIN Histone H4 OS=Bos taurus OX=9913 GN=H4C9 PE=3 SV=1;sp|P62803|H4_BOVIN Histone H4 OS=Bos taurus OX=9913 PE=1 SV=2;tr|A0A3Q1MEZ8|A0A3Q1MEZ8_BOVIN Histone H4 OS=Bos taurus OX=9913 GN=LOC112445458 PE=3 SV=1;tr|E1B9M9|E1B9M9_BOVIN Histone	7	7	7	1	5	5	4	6	6	4	5	5	4	6	6	4	1	1	1	1	1	1	54.1	54.1	7.1	10.949	98	98;103;103;103;103;103;103	2.58	17	19	0	43.827	By MS/MS	By MS/MS	By MS/MS	By MS/MS	By MS/MS	By MS/MS	53.1
F1MX83;A0A3Q1MFC3	F1MX83	S100A11	Matrisome Associated	Secreted Factors	F1MX83;A0A3Q1MFC3	2;2	2;2	2;2	tr|F1MX83|F1MX83_BOVIN Protein S100 OS=Bos taurus OX=9913 GN=S100A11 PE=1 SV=3;tr|A0A3Q1MFC3|A0A3Q1MFC3_BOVIN Protein S100 OS=Bos taurus OX=9913 GN=S100A11 PE=1 SV=1	2	2	2	2	1	1	0	0	0	1	1	1	0	0	0	1	1	1	0	0	0	1	15.1	15.1	15.1	13.724	126	126;142	2	2	1	0	12.114	By MS/MS	By MS/MS				By MS/MS	7.1
A0A3Q1MFH5;E1BC55	A0A3Q1MFH5	KIAA1671	Cytosolic	0	A0A3Q1MFH5;E1BC55	2;2	2;2	2;2	tr|A0A3Q1MFH5|A0A3Q1MFH5_BOVIN KIAA1671 OS=Bos taurus OX=9913 GN=KIAA1671 PE=4 SV=1;tr|E1BC55|E1BC55_BOVIN KIAA1671 OS=Bos taurus OX=9913 GN=KIAA1671 PE=4 SV=3	2	2	2	2	0	1	1	1	2	0	0	1	1	1	2	0	0	1	1	1	2	0	1.4	1.4	1.4	188.86	1755	1755;1800	3	2	4	0	12.202		By MS/MS	By MS/MS	By MS/MS	By MS/MS		0
A0A3Q1MFJ3;Q2KJ32;A0A3Q1N308	A0A3Q1MFJ3	SELENBP1	Nuclear	0	A0A3Q1MFJ3;Q2KJ32;A0A3Q1N308	2;2;2	2;2;2	2;2;2	tr|A0A3Q1MFJ3|A0A3Q1MFJ3_BOVIN Methanethiol oxidase OS=Bos taurus OX=9913 GN=SELENBP1 PE=1 SV=1;sp|Q2KJ32|SBP1_BOVIN Methanethiol oxidase OS=Bos taurus OX=9913 GN=SELENBP1 PE=1 SV=1;tr|A0A3Q1N308|A0A3Q1N308_BOVIN Methanethiol oxidase OS=Bos taurus OX=9913	3	2	2	2	2	2	1	0	0	0	2	2	1	0	0	0	2	2	1	0	0	0	6.1	6.1	6.1	49.252	441	441;472;477	1	5		0	13.242	By MS/MS	By MS/MS	By matching				6.1
A0A3S5ZPJ4;A0A3Q1MFQ7;A0A3Q1MK72	A0A3S5ZPJ4	EWSR1	Nuclear	0	A0A3S5ZPJ4;A0A3Q1MFQ7;A0A3Q1MK72	1;1;1	1;1;1	1;1;1	tr|A0A3S5ZPJ4|A0A3S5ZPJ4_BOVIN EWS RNA binding protein 1 OS=Bos taurus OX=9913 GN=EWSR1 PE=3 SV=1;tr|A0A3Q1MFQ7|A0A3Q1MFQ7_BOVIN EWS RNA binding protein 1 OS=Bos taurus OX=9913 GN=EWSR1 PE=3 SV=1;tr|A0A3Q1MK72|A0A3Q1MK72_BOVIN EWS RNA binding protein 1 OS=	3	1	1	1	1	1	1	1	1	0	1	1	1	1	1	0	1	1	1	1	1	0	2.1	2.1	2.1	68.867	661	661;736;762	2.2	3	2	0	7.7193	By MS/MS	By MS/MS	By MS/MS	By MS/MS	By MS/MS		2.1
A0A3Q1MG89	A0A3Q1MG89	GRB14	Membrane	0	A0A3Q1MG89	1	1	1	tr|A0A3Q1MG89|A0A3Q1MG89_BOVIN Growth factor receptor-bound protein 14 OS=Bos taurus OX=9913 GN=GRB14 PE=3 SV=1	1	1	1	1	0	0	0	0	0	1	0	0	0	0	0	1	0	0	0	0	0	1	3.7	3.7	3.7	57.821	513	513	4		1	0	8.3791						By MS/MS	0
P00978;CON__P00978;F1MMK9;A0A3Q1MGB8	P00978	AMBP ITIL	Cytosolic	0	P00978;CON__P00978;F1MMK9;A0A3Q1MGB8	3;3;3;3	3;3;3;3	3;3;3;3	sp|P00978|AMBP_BOVIN Protein AMBP OS=Bos taurus OX=9913 GN=AMBP PE=1 SV=2;;tr|F1MMK9|F1MMK9_BOVIN Alpha-1-microglobulin OS=Bos taurus OX=9913 GN=KIF12 PE=3 SV=3;tr|A0A3Q1MGB8|A0A3Q1MGB8_BOVIN Alpha-1-microglobulin OS=Bos taurus OX=9913 GN=KIF12 PE=3 SV=1	4	3	3	3	2	2	2	3	3	1	2	2	2	3	3	1	2	2	2	3	3	1	7.1	7.1	7.1	39.234	352	352;352;482;516	2.62	6	7	0	19.862	By MS/MS	By MS/MS	By MS/MS	By MS/MS	By MS/MS	By MS/MS	4.8
O02853;A0A3Q1MGM5	O02853	PTGDS	Nuclear	0	O02853;A0A3Q1MGM5	7;7	7;7	7;7	sp|O02853|PTGDS_BOVIN Prostaglandin-H2 D-isomerase OS=Bos taurus OX=9913 GN=PTGDS PE=1 SV=1;tr|A0A3Q1MGM5|A0A3Q1MGM5_BOVIN Glutathione-independent PGD synthase OS=Bos taurus OX=9913 GN=PTGDS PE=1 SV=1	2	7	7	7	7	7	5	5	5	2	7	7	5	5	5	2	7	7	5	5	5	2	33.5	33.5	33.5	21.229	191	191;193	2.2	21	14	0	87.219	By MS/MS	By MS/MS	By MS/MS	By MS/MS	By MS/MS	By MS/MS	33.5
A0A3Q1MH50	A0A3Q1MH50	BDA20	Cytosolic	0	A0A3Q1MH50	1	1	1	tr|A0A3Q1MH50|A0A3Q1MH50_BOVIN Lipocln_cytosolic_FA-bd_dom domain-containing protein OS=Bos taurus OX=9913 GN=BDA20 PE=3 SV=1	1	1	1	1	0	0	1	0	0	0	0	0	1	0	0	0	0	0	1	0	0	0	5.7	5.7	5.7	19.956	175	175	1	1		1	-2			By MS/MS				0
A0A3Q1MH84;P79342	A0A3Q1MH84	S100A13	Matrisome Associated	Secreted Factors	A0A3Q1MH84;P79342	1;1	1;1	1;1	tr|A0A3Q1MH84|A0A3Q1MH84_BOVIN Protein S100-A13 OS=Bos taurus OX=9913 GN=S100A13 PE=3 SV=1;sp|P79342|S10AD_BOVIN Protein S100-A13 OS=Bos taurus OX=9913 GN=S100A13 PE=3 SV=2	2	1	1	1	1	1	1	1	1	0	1	1	1	1	1	0	1	1	1	1	1	0	12	12	12	10.444	92	92;98	2.2	3	2	0.0028169	6.426	By MS/MS	By MS/MS	By MS/MS	By MS/MS	By MS/MS		12
P13214;A0A3Q1MHG7	P13214	ANXA4 ANX4	Cytosolic	0	P13214;A0A3Q1MHG7	4;4	4;4	4;4	sp|P13214|ANXA4_BOVIN Annexin A4 OS=Bos taurus OX=9913 GN=ANXA4 PE=1 SV=2;tr|A0A3Q1MHG7|A0A3Q1MHG7_BOVIN Annexin OS=Bos taurus OX=9913 GN=ANXA4 PE=1 SV=1	2	4	4	4	3	2	1	4	4	2	3	2	1	4	4	2	3	2	1	4	4	2	16.9	16.9	16.9	35.888	319	319;319	2.88	6	10	0	25.465	By MS/MS	By MS/MS	By MS/MS	By MS/MS	By MS/MS	By MS/MS	12.2
A0A3Q1MHT0;F1MCK2;A0A3Q1NE82	A0A3Q1MHT0	AHNAK	Cytoskeletal	0	A0A3Q1MHT0;F1MCK2;A0A3Q1NE82	23;23;23	23;23;23	23;23;23	tr|A0A3Q1MHT0|A0A3Q1MHT0_BOVIN AHNAK nucleoprotein OS=Bos taurus OX=9913 GN=AHNAK PE=1 SV=1;tr|F1MCK2|F1MCK2_BOVIN AHNAK nucleoprotein OS=Bos taurus OX=9913 GN=AHNAK PE=1 SV=3;tr|A0A3Q1NE82|A0A3Q1NE82_BOVIN AHNAK nucleoprotein OS=Bos taurus OX=9913 GN=AHNA	3	23	23	23	16	16	11	13	13	0	16	16	11	13	13	0	16	16	11	13	13	0	17.3	17.3	17.3	605.14	5675	5675;5707;5768	2.08	50	28	0	179.36	By MS/MS	By MS/MS	By MS/MS	By MS/MS	By MS/MS		14
A0A3Q1MI13;F6PWM7	A0A3Q1MI13	AIMP1	Nuclear	0	A0A3Q1MI13;F6PWM7	2;2	2;2	2;2	tr|A0A3Q1MI13|A0A3Q1MI13_BOVIN Aminoacyl tRNA synthetase complex interacting multifunctional protein 1 OS=Bos taurus OX=9913 GN=AIMP1 PE=1 SV=1;tr|F6PWM7|F6PWM7_BOVIN Aminoacyl tRNA synthetase complex interacting multifunctional protein 1 OS=Bos taurus OX=	2	2	2	2	1	0	1	1	1	0	1	0	1	1	1	0	1	0	1	1	1	0	5.6	5.6	5.6	33.808	306	306;313	2.5	2	2	0	11.632	By MS/MS		By MS/MS	By MS/MS	By MS/MS		3.9
F1MU42;A0A3Q1MIH6	F1MU42	MAVS	Membrane	0	F1MU42;A0A3Q1MIH6	1;1	1;1	1;1	tr|F1MU42|F1MU42_BOVIN Mitochondrial antiviral signaling protein OS=Bos taurus OX=9913 GN=MAVS PE=4 SV=2;tr|A0A3Q1MIH6|A0A3Q1MIH6_BOVIN Mitochondrial antiviral signaling protein OS=Bos taurus OX=9913 GN=MAVS PE=4 SV=1	2	1	1	1	0	0	0	0	0	1	0	0	0	0	0	1	0	0	0	0	0	1	3.2	3.2	3.2	56.193	529	529;615	4		1	0	8.4276						By MS/MS	0
Q3SX14;F1MJH1;A0A3Q1MIW2;CON__Q3SX14;A0A3Q1MIS1;F1N1I6	Q3SX14	GSN	Cytoskeletal	0	Q3SX14;F1MJH1;A0A3Q1MIW2;CON__Q3SX14;A0A3Q1MIS1;F1N1I6	3;3;3;3;3;3	3;3;3;3;3;3	3;3;3;3;3;3	sp|Q3SX14|GELS_BOVIN Gelsolin OS=Bos taurus OX=9913 GN=GSN PE=2 SV=1;tr|F1MJH1|F1MJH1_BOVIN Actin-depolymerizing factor OS=Bos taurus OX=9913 GN=GSN PE=3 SV=1;tr|A0A3Q1MIW2|A0A3Q1MIW2_BOVIN Actin-depolymerizing factor OS=Bos taurus OX=9913 GN=GSN PE=3 SV=1	6	3	3	3	2	2	1	1	1	0	2	2	1	1	1	0	2	2	1	1	1	0	7.4	7.4	7.4	80.73	731	731;731;742;781;817;846	1.86	5	2	0	27.082	By MS/MS	By MS/MS	By MS/MS	By MS/MS	By MS/MS		4.4
A0A3Q1MJD9;Q3SWX7;F1MWQ2;A0A3Q1LT59	A0A3Q1MJD9	ANXA3	Matrisome Associated	ECM-affiliated Proteins	A0A3Q1MJD9;Q3SWX7;F1MWQ2;A0A3Q1LT59	7;7;7;6	7;7;7;6	7;7;7;6	tr|A0A3Q1MJD9|A0A3Q1MJD9_BOVIN Annexin OS=Bos taurus OX=9913 GN=ANXA3 PE=3 SV=1;sp|Q3SWX7|ANXA3_BOVIN Annexin A3 OS=Bos taurus OX=9913 GN=ANXA3 PE=2 SV=3;tr|F1MWQ2|F1MWQ2_BOVIN Annexin OS=Bos taurus OX=9913 GN=ANXA3 PE=3 SV=1;tr|A0A3Q1LT59|A0A3Q1LT59_BOVIN	4	7	7	7	6	6	4	4	4	1	6	6	4	4	4	1	6	6	4	4	4	1	19.7	19.7	19.7	35.651	319	319;323;323;304	2.08	16	9	0	52.978	By MS/MS	By MS/MS	By MS/MS	By MS/MS	By MS/MS	By matching	19.7
A0A3Q1MJF8;A0A3Q1MME4;Q2HJ60	A0A3Q1MJF8	0	Cytosolic	0	A0A3Q1MJF8;A0A3Q1MME4;Q2HJ60	1;1;1	1;1;1	1;1;1	tr|A0A3Q1MJF8|A0A3Q1MJF8_BOVIN RRM domain-containing protein OS=Bos taurus OX=9913 PE=4 SV=1;tr|A0A3Q1MME4|A0A3Q1MME4_BOVIN Heterogeneous nuclear ribonucleoproteins A2/B1 OS=Bos taurus OX=9913 GN=HNRNPA2B1 PE=1 SV=1;sp|Q2HJ60|ROA2_BOVIN Heterogeneous nucle	3	1	1	1	1	1	1	1	1	0	1	1	1	1	1	0	1	1	1	1	1	0	4.1	4.1	4.1	25.492	241	241;313;341	2.2	3	2	0.005168	6.2185	By MS/MS	By MS/MS	By MS/MS	By MS/MS	By MS/MS		4.1
O02739;A0A3Q1MJK1;F1N0T3;A0A3Q1NAJ0;A0A3Q1LKH6;G3X7H8;A6QPW6	O02739	SERPINB6	Cytosolic	0	O02739;A0A3Q1MJK1	14;14;6;6;3;2;1	14;14;6;6;3;2;1	12;12;4;6;3;1;0	sp|O02739|SPB6_BOVIN Serpin B6 OS=Bos taurus OX=9913 GN=SERPINB6 PE=2 SV=1;tr|A0A3Q1MJK1|A0A3Q1MJK1_BOVIN Serpin B6 OS=Bos taurus OX=9913 GN=SERPINB6 PE=3 SV=1	7	14	14	12	11	11	6	9	10	4	11	11	6	9	10	4	11	10	6	8	9	4	36.8	36.8	31.7	42.56	378	378;378;378;378;377;378;405	2.37	31	26	0	213.04	By MS/MS	By MS/MS	By MS/MS	By MS/MS	By MS/MS	By MS/MS	31.7
Q2KJF1;CON__Q2KJF1;A0A3Q1MJT2	Q2KJF1	A1BG	Cytosolic	0	Q2KJF1;CON__Q2KJF1;A0A3Q1MJT2	5;5;5	5;5;5	5;5;5	sp|Q2KJF1|A1BG_BOVIN Alpha-1B-glycoprotein OS=Bos taurus OX=9913 GN=A1BG PE=1 SV=1;;tr|A0A3Q1MJT2|A0A3Q1MJT2_BOVIN Alpha-1B-glycoprotein OS=Bos taurus OX=9913 GN=A1BG PE=1 SV=1	3	5	5	5	4	4	4	4	5	1	4	4	4	4	5	1	4	4	4	4	5	1	17.7	17.7	17.7	53.553	503	503;503;586	2.36	12	10	0	145.24	By MS/MS	By MS/MS	By MS/MS	By MS/MS	By MS/MS	By MS/MS	15.7
A0A3Q1MK89;E1BCF0	A0A3Q1MK89	PIBF1	Cytoskeletal	0	A0A3Q1MK89;E1BCF0	2;2	2;2	2;2	tr|A0A3Q1MK89|A0A3Q1MK89_BOVIN Progesterone immunomodulatory binding factor 1 OS=Bos taurus OX=9913 GN=PIBF1 PE=4 SV=1;tr|E1BCF0|E1BCF0_BOVIN Progesterone immunomodulatory binding factor 1 OS=Bos taurus OX=9913 GN=PIBF1 PE=4 SV=3	2	2	2	2	2	2	1	1	1	0	2	2	1	1	1	0	2	2	1	1	1	0	2.1	2.1	2.1	88.431	747	747;757	1.86	5	2	0	11.343	By MS/MS	By MS/MS	By MS/MS	By MS/MS	By MS/MS		2.1
A0A3Q1MKC8;Q29S21;CON__Q3KNV1;CON__P08729;P05786;F1MU12	A0A3Q1MKC8	KRT7	Cytoskeletal	0	A0A3Q1MKC8;Q29S21;CON__Q3KNV1;CON__P08729	7;7;5;5;3;3	1;1;1;1;0;0	0;0;0;0;0;0	tr|A0A3Q1MKC8|A0A3Q1MKC8_BOVIN Keratin, type II cytoskeletal 7 OS=Bos taurus OX=9913 GN=KRT7 PE=1 SV=1;sp|Q29S21|K2C7_BOVIN Keratin, type II cytoskeletal 7 OS=Bos taurus OX=9913 GN=KRT7 PE=2 SV=1;;	6	7	1	0	2	2	3	5	3	5	0	0	0	1	1	1	0	0	0	0	0	0	11.8	2.6	0	50.883	457	457;466;469;469;478;478	4		3	0	7.5139	By matching	By matching	By matching	By matching	By matching	By MS/MS	4.4
A0A3Q1MTB8;Q28034;A0A3Q1MKJ7	A0A3Q1MTB8	PRKCSH	Cytosolic	0	A0A3Q1MTB8;Q28034;A0A3Q1MKJ7	1;1;1	1;1;1	1;1;1	tr|A0A3Q1MTB8|A0A3Q1MTB8_BOVIN Glucosidase 2 subunit beta OS=Bos taurus OX=9913 GN=PRKCSH PE=1 SV=1;sp|Q28034|GLU2B_BOVIN Glucosidase 2 subunit beta OS=Bos taurus OX=9913 GN=PRKCSH PE=2 SV=1;tr|A0A3Q1MKJ7|A0A3Q1MKJ7_BOVIN Glucosidase 2 subunit beta OS=Bos	3	1	1	1	1	1	0	1	1	0	1	1	0	1	1	0	1	1	0	1	1	0	2.3	2.3	2.3	58.704	521	521;533;593	2.5	2	2	0	6.8833	By matching	By MS/MS		By matching	By MS/MS		2.3
Q08DD2;A0A3Q1MKT9	Q08DD2	UBALD1 MGC142811	Cytosolic	0	Q08DD2;A0A3Q1MKT9	1;1	1;1	1;1	tr|Q08DD2|Q08DD2_BOVIN UBA like domain containing 1 OS=Bos taurus OX=9913 GN=UBALD1 PE=2 SV=1;tr|A0A3Q1MKT9|A0A3Q1MKT9_BOVIN UBA like domain containing 1 OS=Bos taurus OX=9913 GN=UBALD1 PE=3 SV=1	2	1	1	1	0	0	0	1	1	0	0	0	0	1	1	0	0	0	0	1	1	0	5.1	5.1	5.1	19.015	178	178;389	4		2	1	-2				By MS/MS	By matching		0
A0A3Q1MKX5;F1MPC9	A0A3Q1MKX5	ADCY3	Nuclear	0	A0A3Q1MKX5;F1MPC9	1;1	1;1	1;1	tr|A0A3Q1MKX5|A0A3Q1MKX5_BOVIN Adenylate cyclase type 3 OS=Bos taurus OX=9913 GN=ADCY3 PE=3 SV=1;tr|F1MPC9|F1MPC9_BOVIN Adenylate cyclase type 3 OS=Bos taurus OX=9913 GN=ADCY3 PE=3 SV=2	2	1	1	1	0	0	0	1	0	1	0	0	0	1	0	1	0	0	0	1	0	1	1.5	1.5	1.5	124.33	1106	1106;1145	4		2	1	-2				By MS/MS		By MS/MS	0
A0A3Q1MKZ2	A0A3Q1MKZ2	0	Cytosolic	0	A0A3Q1MKZ2	1	1	1	tr|A0A3Q1MKZ2|A0A3Q1MKZ2_BOVIN Acyl-CoA_dh_1 domain-containing protein OS=Bos taurus OX=9913 PE=4 SV=1	1	1	1	1	0	0	0	1	0	0	0	0	0	1	0	0	0	0	0	1	0	0	4.2	4.2	4.2	24.035	216	216	4		1	1	-2				By MS/MS			0
P26285;A0A3Q1MTT6;A0A3Q1MLJ3	P26285	PFKFB2	Nuclear	0	P26285;A0A3Q1MTT6;A0A3Q1MLJ3	1;1;1	1;1;1	1;1;1	sp|P26285|F262_BOVIN 6-phosphofructo-2-kinase/fructose-2,6-bisphosphatase 2 OS=Bos taurus OX=9913 GN=PFKFB2 PE=1 SV=2;tr|A0A3Q1MTT6|A0A3Q1MTT6_BOVIN 6-phosphofructo-2-kinase OS=Bos taurus OX=9913 GN=PFKFB2 PE=3 SV=1;tr|A0A3Q1MLJ3|A0A3Q1MLJ3_BOVIN 6-phospho	3	1	1	1	0	0	0	1	1	1	0	0	0	1	1	1	0	0	0	1	1	1	3.2	3.2	3.2	60.811	531	531;527;535	4		3	0.0052219	6.2404				By MS/MS	By MS/MS	By matching	0
A0A3Q1MLK9;E1BHM6	A0A3Q1MLK9	SCN11A	Membrane	0	A0A3Q1MLK9;E1BHM6	1;1	1;1	1;1	tr|A0A3Q1MLK9|A0A3Q1MLK9_BOVIN Sodium channel protein OS=Bos taurus OX=9913 GN=SCN11A PE=3 SV=1;tr|E1BHM6|E1BHM6_BOVIN Sodium channel protein OS=Bos taurus OX=9913 GN=SCN11A PE=3 SV=3	2	1	1	1	1	0	0	0	0	0	1	0	0	0	0	0	1	0	0	0	0	0	0.5	0.5	0.5	201.8	1762	1762;1789	1	1		1	-2	By MS/MS						0.5
A0A3Q1MLR0;Q5EA64;F1N103	A0A3Q1MLR0	COCH	Core Matrisome	ECM Glycoproteins	A0A3Q1MLR0;Q5EA64;F1N103	2;2;2	2;2;2	2;2;2	tr|A0A3Q1MLR0|A0A3Q1MLR0_BOVIN Cochlin OS=Bos taurus OX=9913 GN=COCH PE=4 SV=1;sp|Q5EA64|COCH_BOVIN Cochlin OS=Bos taurus OX=9913 GN=COCH PE=2 SV=1;tr|F1N103|F1N103_BOVIN Cochlin OS=Bos taurus OX=9913 GN=COCH PE=4 SV=2	3	2	2	2	1	2	0	1	1	0	1	2	0	1	1	0	1	2	0	1	1	0	4.7	4.7	4.7	57.014	527	527;550;550	2.2	3	2	0	13.975	By MS/MS	By MS/MS		By MS/MS	By MS/MS		2.7
Q9TTJ5;A0A3Q1MLX2	Q9TTJ5	RGN SMP30	Cytosolic	0	Q9TTJ5;A0A3Q1MLX2	6;6	6;6	6;6	sp|Q9TTJ5|RGN_BOVIN Regucalcin OS=Bos taurus OX=9913 GN=RGN PE=2 SV=1;tr|A0A3Q1MLX2|A0A3Q1MLX2_BOVIN Gluconolactonase OS=Bos taurus OX=9913 GN=RGN PE=3 SV=1	2	6	6	6	5	4	6	6	6	3	5	4	6	6	6	3	5	4	6	6	6	3	24.7	24.7	24.7	33.307	299	299;301	2.29	20	15	0	53.937	By MS/MS	By MS/MS	By MS/MS	By MS/MS	By MS/MS	By MS/MS	20.7
A0A3Q1MN52	A0A3Q1MN52	LOC100848555	Cytosolic	0	A0A3Q1MN52	1	1	1	tr|A0A3Q1MN52|A0A3Q1MN52_BOVIN GAGE domain-containing protein OS=Bos taurus OX=9913 GN=LOC100848555 PE=3 SV=1	1	1	1	1	1	1	1	1	1	0	1	1	1	1	1	0	1	1	1	1	1	0	13.5	13.5	13.5	11.046	104	104	2.09	7	4	0	8.3416	By MS/MS	By MS/MS	By MS/MS	By MS/MS	By MS/MS		13.5
A0A3Q1MQ01;Q0V7M7;G3X7D1;A0A3Q1NEK5	A0A3Q1MQ01	SKA1	Cytoskeletal	0	A0A3Q1MQ01;Q0V7M7;G3X7D1;A0A3Q1NEK5	1;1;1;1	1;1;1;1	1;1;1;1	tr|A0A3Q1MQ01|A0A3Q1MQ01_BOVIN Spindle and kinetochore-associated protein 1 OS=Bos taurus OX=9913 GN=SKA1 PE=3 SV=1;sp|Q0V7M7|SKA1_BOVIN Spindle and kinetochore-associated protein 1 OS=Bos taurus OX=9913 GN=SKA1 PE=2 SV=2;tr|G3X7D1|G3X7D1_BOVIN Spindle and	4	1	1	1	1	1	1	0	0	0	1	1	1	0	0	0	1	1	1	0	0	0	3.1	3.1	3.1	26.229	228	228;254;254;269	1	4		1	-2	By matching	By MS/MS	By MS/MS				3.1
F1N2B5;A0A3Q1MQ59;Q08DL0	F1N2B5	SLC3A2	Nuclear	0	F1N2B5;A0A3Q1MQ59;Q08DL0	1;1;1	1;1;1	1;1;1	tr|F1N2B5|F1N2B5_BOVIN Solute carrier family 3 member 2 OS=Bos taurus OX=9913 GN=SLC3A2 PE=1 SV=3;tr|A0A3Q1MQ59|A0A3Q1MQ59_BOVIN Solute carrier family 3 member 2 OS=Bos taurus OX=9913 GN=SLC3A2 PE=1 SV=1;tr|Q08DL0|Q08DL0_BOVIN SLC3A2 protein OS=Bos taurus	3	1	1	1	1	0	0	0	0	0	1	0	0	0	0	0	1	0	0	0	0	0	3	3	3	59.01	537	537;556;572	1	1		0	7.6502	By MS/MS						3
Q28178;F1N3A1;CON__Q28194;A0A3Q1MQV3	Q28178	THBS1 TSP-1 TSP1	Cytosolic	0	Q28178;F1N3A1;CON__Q28194;A0A3Q1MQV3	4;4;4;4	4;4;4;4	4;4;4;4	sp|Q28178|TSP1_BOVIN Thrombospondin-1 OS=Bos taurus OX=9913 GN=THBS1 PE=2 SV=2;tr|F1N3A1|F1N3A1_BOVIN Thrombospondin-1 OS=Bos taurus OX=9913 GN=THBS1 PE=3 SV=1;;tr|A0A3Q1MQV3|A0A3Q1MQV3_BOVIN Thrombospondin-1 OS=Bos taurus OX=9913 GN=THBS1 PE=3 SV=1	4	4	4	4	3	2	3	2	2	0	3	2	3	2	2	0	3	2	3	2	2	0	3.4	3.4	3.4	129.53	1170	1170;1170;1170;1175	2	8	4	0	25.504	By MS/MS	By MS/MS	By MS/MS	By MS/MS	By MS/MS		2.6
F1MSZ6;P41361;CON__P41361;A0A3Q1MS55;A0A3Q1NJR8	F1MSZ6	SERPINC1	Matrisome Associated	ECM Regulators	F1MSZ6;P41361;CON__P41361;A0A3Q1MS55;A0A3Q1NJR8	4;4;4;4;4	4;4;4;4;4	4;4;4;4;4	tr|F1MSZ6|F1MSZ6_BOVIN Antithrombin-III OS=Bos taurus OX=9913 GN=SERPINC1 PE=3 SV=2;sp|P41361|ANT3_BOVIN Antithrombin-III OS=Bos taurus OX=9913 GN=SERPINC1 PE=1 SV=2;;tr|A0A3Q1MS55|A0A3Q1MS55_BOVIN Antithrombin-III OS=Bos taurus OX=9913 GN=SERPINC1 PE=3 SV	5	4	4	4	4	4	2	3	3	1	4	4	2	3	3	1	4	4	2	3	3	1	11	11	11	48.856	429	429;465;465;494;530	2.33	10	8	0	28.621	By MS/MS	By MS/MS	By MS/MS	By MS/MS	By MS/MS	By matching	11
Q9XT56;A0A3Q1MSB5	Q9XT56	F11R JAM1	Cytosolic	0	Q9XT56;A0A3Q1MSB5	2;2	2;2	2;2	sp|Q9XT56|JAM1_BOVIN Junctional adhesion molecule A OS=Bos taurus OX=9913 GN=F11R PE=2 SV=1;tr|A0A3Q1MSB5|A0A3Q1MSB5_BOVIN Junctional adhesion molecule 1 OS=Bos taurus OX=9913 GN=F11R PE=3 SV=1	2	2	2	2	0	1	0	1	1	1	0	1	0	1	1	1	0	1	0	1	1	1	8.7	8.7	8.7	32.455	298	298;319	3.25	1	3	0	11.92		By MS/MS		By MS/MS	By MS/MS	By matching	0
Q3SZJ7;A0A3Q1MTN6;G3MXJ5;A0A3Q1N8P4;A0A3Q1LZC9	Q3SZJ7	LAMP2	Membrane	0	Q3SZJ7;A0A3Q1MTN6;G3MXJ5;A0A3Q1N8P4	3;3;3;3;1	3;3;3;3;1	3;3;3;3;1	tr|Q3SZJ7|Q3SZJ7_BOVIN Lysosomal-associated membrane protein 2 OS=Bos taurus OX=9913 GN=LAMP2 PE=1 SV=1;tr|A0A3Q1MTN6|A0A3Q1MTN6_BOVIN Lysosomal associated membrane protein 2 OS=Bos taurus OX=9913 GN=LAMP2 PE=1 SV=1;tr|G3MXJ5|G3MXJ5_BOVIN Lysosomal associa	5	3	3	3	3	3	2	1	1	0	3	3	2	1	1	0	3	3	2	1	1	0	4.9	4.9	4.9	44.542	407	407;414;452;453;392	1.6	8	2	0	17.936	By MS/MS	By MS/MS	By MS/MS	By MS/MS	By MS/MS		4.9
P01888;A0A3Q1MU93	P01888	B2M	Cytosolic	0	P01888;A0A3Q1MU93	4;4	4;4	4;4	sp|P01888|B2MG_BOVIN Beta-2-microglobulin OS=Bos taurus OX=9913 GN=B2M PE=1 SV=2;tr|A0A3Q1MU93|A0A3Q1MU93_BOVIN Beta-2-microglobulin OS=Bos taurus OX=9913 PE=3 SV=1	2	4	4	4	3	3	3	3	3	0	3	3	3	3	3	0	3	3	3	3	3	0	18.6	18.6	18.6	13.677	118	118;119	2.31	9	7	0	24.654	By MS/MS	By MS/MS	By MS/MS	By MS/MS	By MS/MS		16.9
P38408;A0A3Q1MUH6	P38408	GNA14	Cytosolic	0	P38408;A0A3Q1MUH6	1;1	1;1	1;1	sp|P38408|GNA14_BOVIN Guanine nucleotide-binding protein subunit alpha-14 OS=Bos taurus OX=9913 GN=GNA14 PE=2 SV=1;tr|A0A3Q1MUH6|A0A3Q1MUH6_BOVIN Guanine nucleotide-binding protein subunit alpha-14 OS=Bos taurus OX=9913 GN=GNA14 PE=3 SV=1	2	1	1	1	1	1	1	1	1	0	1	1	1	1	1	0	1	1	1	1	1	0	4.8	4.8	4.8	41.498	355	355;357	2.12	5	3	0.0027548	6.3588	By MS/MS	By MS/MS	By MS/MS	By MS/MS	By MS/MS		4.8
Q32L46;A0A3Q1MUV7	Q32L46	NT5C3A NT5C3	Cytosolic	0	Q32L46;A0A3Q1MUV7	1;1	1;1	1;1	tr|Q32L46|Q32L46_BOVIN 5-nucleotidase OS=Bos taurus OX=9913 GN=NT5C3A PE=2 SV=1;tr|A0A3Q1MUV7|A0A3Q1MUV7_BOVIN 5-nucleotidase OS=Bos taurus OX=9913 GN=LOC534181 PE=3 SV=1	2	1	1	1	1	1	0	0	0	0	1	1	0	0	0	0	1	1	0	0	0	0	2.4	2.4	2.4	33.967	297	297;362	1	2		0.0097087	6.118	By MS/MS	By MS/MS					2.4
F1MJM4;A6QQ07;A0A3Q1MUX4	F1MJM4	BTD	Cytosolic	0	F1MJM4;A6QQ07;A0A3Q1MUX4	2;2;2	2;2;2	2;2;2	tr|F1MJM4|F1MJM4_BOVIN Biotinidase OS=Bos taurus OX=9913 GN=BTD PE=3 SV=2;sp|A6QQ07|BTD_BOVIN Biotinidase OS=Bos taurus OX=9913 GN=BTD PE=2 SV=1;tr|A0A3Q1MUX4|A0A3Q1MUX4_BOVIN Biotinidase OS=Bos taurus OX=9913 GN=BTD PE=3 SV=1	3	2	2	2	2	1	1	2	2	0	2	1	1	2	2	0	2	1	1	2	2	0	5.3	5.3	5.3	58.31	525	525;525;534	2.5	4	4	0	78.473	By MS/MS	By MS/MS	By MS/MS	By MS/MS	By MS/MS		5.3
A0A3Q1MW28;Q3T0I2	A0A3Q1MW28	CTSH	Matrisome Associated	ECM Regulators	A0A3Q1MW28;Q3T0I2	1;1	1;1	1;1	tr|A0A3Q1MW28|A0A3Q1MW28_BOVIN Pro-cathepsin H OS=Bos taurus OX=9913 GN=CTSH PE=3 SV=1;sp|Q3T0I2|CATH_BOVIN Pro-cathepsin H OS=Bos taurus OX=9913 GN=CTSH PE=2 SV=1	2	1	1	1	1	1	1	0	0	0	1	1	1	0	0	0	1	1	1	0	0	0	4.5	4.5	4.5	34.872	312	312;335	1	3		0.0028249	6.4277	By MS/MS	By MS/MS	By MS/MS				4.5
Q08DM3;A0A3Q1MWG7	Q08DM3	ME2	Cytosolic	0	Q08DM3;A0A3Q1MWG7	1;1	1;1	1;1	tr|Q08DM3|Q08DM3_BOVIN Malic enzyme OS=Bos taurus OX=9913 GN=ME2 PE=2 SV=1;tr|A0A3Q1MWG7|A0A3Q1MWG7_BOVIN Malic enzyme OS=Bos taurus OX=9913 GN=ME2 PE=3 SV=1	2	1	1	1	0	1	0	0	0	0	0	1	0	0	0	0	0	1	0	0	0	0	2.2	2.2	2.2	65.412	584	584;607	1	1		1	-2		By MS/MS					0
Q9XSJ4;F1MB08;A0A3Q1MXQ0;A0A3Q1LGA6;A0A3Q1LMT0;A0A3Q1MIY8;Q3ZC09;A6QR19;A0A452DI31;A0A3Q1M0V5	Q9XSJ4	ENO1	Membrane	0	Q9XSJ4;F1MB08;A0A3Q1MXQ0;A0A3Q1LGA6	4;4;4;3;1;1;1;1;1;1	4;4;4;3;1;1;1;1;1;1	4;4;4;3;1;1;1;1;1;1	sp|Q9XSJ4|ENOA_BOVIN Alpha-enolase OS=Bos taurus OX=9913 GN=ENO1 PE=1 SV=4;tr|F1MB08|F1MB08_BOVIN 2-phospho-D-glycerate hydro-lyase OS=Bos taurus OX=9913 GN=ENO1 PE=3 SV=2;tr|A0A3Q1MXQ0|A0A3Q1MXQ0_BOVIN 2-phospho-D-glycerate hydro-lyase OS=Bos taurus OX=99	10	4	4	4	3	3	2	1	1	0	3	3	2	1	1	0	3	3	2	1	1	0	13.1	13.1	13.1	47.326	434	434;500;500;415;412;427;434;434;444;576	1.6	8	2	0	42.654	By MS/MS	By MS/MS	By MS/MS	By MS/MS	By MS/MS		10.4
A0A3Q1MXU7;F1MYC9	A0A3Q1MXU7	SPTBN1	Cytoskeletal	0	A0A3Q1MXU7;F1MYC9	1;1	1;1	1;1	tr|A0A3Q1MXU7|A0A3Q1MXU7_BOVIN Spectrin beta chain OS=Bos taurus OX=9913 GN=SPTBN1 PE=1 SV=1;tr|F1MYC9|F1MYC9_BOVIN Spectrin beta chain OS=Bos taurus OX=9913 GN=SPTBN1 PE=1 SV=1	2	1	1	1	1	1	1	1	1	0	1	1	1	1	1	0	1	1	1	1	1	0	0.5	0.5	0.5	272.68	2350	2350;2363	2.2	3	2	0	15.826	By matching	By MS/MS	By MS/MS	By MS/MS	By MS/MS		0.5
A0A3Q1MZR0	A0A3Q1MZR0	MEX3B	Nuclear	0	A0A3Q1MZR0	1	1	1	tr|A0A3Q1MZR0|A0A3Q1MZR0_BOVIN RING-type domain-containing protein OS=Bos taurus OX=9913 GN=MEX3B PE=4 SV=1	1	1	1	1	0	0	0	0	0	1	0	0	0	0	0	1	0	0	0	0	0	1	1.9	1.9	1.9	59.82	588	588	4		1	0.0027701	6.3857						By MS/MS	0
Q2KIY5;F1MIH9;A0A3Q1N1J5	Q2KIY5	PLBD2	Cytosolic	0	Q2KIY5;F1MIH9;A0A3Q1N1J5	3;3;3	3;3;3	3;3;3	sp|Q2KIY5|PLBL2_BOVIN Putative phospholipase B-like 2 OS=Bos taurus OX=9913 GN=PLBD2 PE=2 SV=1;tr|F1MIH9|F1MIH9_BOVIN Phospholipase B-like OS=Bos taurus OX=9913 GN=PLBD2 PE=3 SV=2;tr|A0A3Q1N1J5|A0A3Q1N1J5_BOVIN Phospholipase B-like OS=Bos taurus OX=9913 GN	3	3	3	3	3	2	3	2	2	1	3	2	3	2	2	1	3	2	3	2	2	1	7.6	7.6	7.6	65.692	589	589;589;632	2	10	5	0	21.299	By MS/MS	By MS/MS	By MS/MS	By MS/MS	By MS/MS	By MS/MS	7.6
A0A3Q1N2B9	A0A3Q1N2B9	0	Cytosolic	0	A0A3Q1N2B9	2	1	0	tr|A0A3Q1N2B9|A0A3Q1N2B9_BOVIN Ig-like domain-containing protein OS=Bos taurus OX=9913 PE=4 SV=1	1	2	1	0	2	2	2	2	2	1	1	1	1	1	1	0	0	0	0	0	0	0	18.2	11.9	0	15.055	143	143	2.38	7	6	0	12.269	By MS/MS	By MS/MS	By MS/MS	By MS/MS	By MS/MS	By matching	18.2
A0A3Q1N3D2	A0A3Q1N3D2	LOC618359	Cytosolic	0	A0A3Q1N3D2	2	2	2	tr|A0A3Q1N3D2|A0A3Q1N3D2_BOVIN Uncharacterized protein OS=Bos taurus OX=9913 GN=LOC618359 PE=3 SV=1	1	2	2	2	0	0	0	0	0	2	0	0	0	0	0	2	0	0	0	0	0	2	17.9	17.9	17.9	8.6155	84	84	4		2	0	13.564						By MS/MS	0
A0A3Q1N3I9;G3N0V0	A0A3Q1N3I9	0	Cytosolic	0	A0A3Q1N3I9;G3N0V0	10;10	4;4	4;4	tr|A0A3Q1N3I9|A0A3Q1N3I9_BOVIN Uncharacterized protein OS=Bos taurus OX=9913 PE=1 SV=1;tr|G3N0V0|G3N0V0_BOVIN Uncharacterized protein OS=Bos taurus OX=9913 PE=1 SV=1	2	10	4	4	7	6	4	8	8	4	2	1	1	4	3	2	2	1	1	4	3	2	24.7	15.9	15.9	35.256	320	320;326	2.67	19	24	0	133.35	By MS/MS	By MS/MS	By MS/MS	By MS/MS	By MS/MS	By MS/MS	17.8
P13213;A0A3Q1N541	P13213	SPARC	Core Matrisome	ECM Glycoproteins	P13213;A0A3Q1N541	2;2	2;2	2;2	sp|P13213|SPRC_BOVIN SPARC OS=Bos taurus OX=9913 GN=SPARC PE=1 SV=2;tr|A0A3Q1N541|A0A3Q1N541_BOVIN Osteonectin OS=Bos taurus OX=9913 GN=SPARC PE=3 SV=1	2	2	2	2	1	1	0	1	1	0	1	1	0	1	1	0	1	1	0	1	1	0	4.6	4.6	4.6	34.613	303	303;389	2.5	2	2	0	12.466	By MS/MS	By MS/MS		By MS/MS	By MS/MS		4.6
A0A3Q1N6D1;Q865V6;A0A3Q1MDS0	A0A3Q1N6D1	CAPG	Cytoskeletal	0	A0A3Q1N6D1;Q865V6;A0A3Q1MDS0	4;4;2	4;4;2	4;4;2	tr|A0A3Q1N6D1|A0A3Q1N6D1_BOVIN Macrophage-capping protein OS=Bos taurus OX=9913 GN=CAPG PE=1 SV=1;sp|Q865V6|CAPG_BOVIN Macrophage-capping protein OS=Bos taurus OX=9913 GN=CAPG PE=2 SV=1;tr|A0A3Q1MDS0|A0A3Q1MDS0_BOVIN Macrophage-capping protein OS=Bos tauru	3	4	4	4	2	2	1	3	3	0	2	2	1	3	3	0	2	2	1	3	3	0	13.2	13.2	13.2	40.647	363	363;349;336	2.64	5	6	0	25.429	By MS/MS	By MS/MS	By matching	By MS/MS	By MS/MS		6.9
A0A3Q1N802;E1BPM0	A0A3Q1N802	RASAL1	Cytosolic	0	A0A3Q1N802;E1BPM0	1;1	1;1	1;1	tr|A0A3Q1N802|A0A3Q1N802_BOVIN RAS protein activator like 1 OS=Bos taurus OX=9913 GN=RASAL1 PE=4 SV=1;tr|E1BPM0|E1BPM0_BOVIN RAS protein activator like 1 OS=Bos taurus OX=9913 GN=RASAL1 PE=4 SV=2	2	1	1	1	0	0	1	0	0	1	0	0	1	0	0	1	0	0	1	0	0	1	1.7	1.7	1.7	91.373	818	818;839	3.4	1	4	0.002924	6.5252			By MS/MS			By MS/MS	0
P61603;A0A3Q1N8Q5	P61603	HSPE1	Cytosolic	0	P61603;A0A3Q1N8Q5	1;1	1;1	1;1	sp|P61603|CH10_BOVIN 10 kDa heat shock protein, mitochondrial OS=Bos taurus OX=9913 GN=HSPE1 PE=3 SV=2;tr|A0A3Q1N8Q5|A0A3Q1N8Q5_BOVIN 10 kDa heat shock protein, mitochondrial OS=Bos taurus OX=9913 GN=HSPE1 PE=1 SV=1	2	1	1	1	1	1	1	1	1	0	1	1	1	1	1	0	1	1	1	1	1	0	13.7	13.7	13.7	10.932	102	102;259	2.2	3	2	0	7.5204	By MS/MS	By MS/MS	By MS/MS	By MS/MS	By MS/MS		13.7
Q5BIN2;A0A3Q1N9F8	Q5BIN2	SMARCB1 BAF47	Cytosolic	0	Q5BIN2;A0A3Q1N9F8	1;1	1;1	1;1	sp|Q5BIN2|SNF5_BOVIN SWI/SNF-related matrix-associated actin-dependent regulator of chromatin subfamily B member 1 OS=Bos taurus OX=9913 GN=SMARCB1 PE=2 SV=1;tr|A0A3Q1N9F8|A0A3Q1N9F8_BOVIN SWI/SNF-related matrix-associated actin-dependent regulator of chro	2	1	1	1	1	1	1	1	1	0	1	1	1	1	1	0	1	1	1	1	1	0	2.3	2.3	2.3	44.111	385	385;436	2.5	4	4	0.0028011	6.4013	By MS/MS	By MS/MS	By MS/MS	By MS/MS	By MS/MS		2.3
A0A3Q1N9S5;Q3T0D0	A0A3Q1N9S5	HNRNPK	Nuclear	0	A0A3Q1N9S5;Q3T0D0	1;1	1;1	1;1	tr|A0A3Q1N9S5|A0A3Q1N9S5_BOVIN Heterogeneous nuclear ribonucleoprotein K OS=Bos taurus OX=9913 GN=HNRNPK PE=1 SV=1;sp|Q3T0D0|HNRPK_BOVIN Heterogeneous nuclear ribonucleoprotein K OS=Bos taurus OX=9913 GN=HNRNPK PE=2 SV=1	2	1	1	1	1	1	1	1	1	0	1	1	1	1	1	0	1	1	1	1	1	0	2.5	2.5	2.5	48.001	437	437;464	2.2	3	2	0.0028736	6.4766	By MS/MS	By MS/MS	By MS/MS	By MS/MS	By MS/MS		2.5
A0A3Q1NB16	A0A3Q1NB16	0	Cytosolic	0	A0A3Q1NB16	1	1	1	tr|A0A3Q1NB16|A0A3Q1NB16_BOVIN Uncharacterized protein OS=Bos taurus OX=9913 PE=4 SV=1	1	1	1	1	1	0	0	0	0	0	1	0	0	0	0	0	1	0	0	0	0	0	3	3	3	50.178	464	464	1	1		0	7.9331	By MS/MS						3
A0A3Q1NBN2;F1MRP8	A0A3Q1NBN2	PLEKHG1	Nuclear	0	A0A3Q1NBN2;F1MRP8	1;1	1;1	1;1	tr|A0A3Q1NBN2|A0A3Q1NBN2_BOVIN Pleckstrin homology and RhoGEF domain containing G1 OS=Bos taurus OX=9913 GN=PLEKHG1 PE=4 SV=1;tr|F1MRP8|F1MRP8_BOVIN Pleckstrin homology and RhoGEF domain containing G1 OS=Bos taurus OX=9913 GN=PLEKHG1 PE=4 SV=3	2	1	1	1	0	0	0	0	0	1	0	0	0	0	0	1	0	0	0	0	0	1	1.3	1.3	1.3	153.62	1380	1380;1436	4		1	0	9.1629						By MS/MS	0
Q3T0K1;F1N3H1;A0A3Q1NC75	Q3T0K1	CALU	Membrane	0	Q3T0K1;F1N3H1;A0A3Q1NC75	2;2;2	2;2;2	2;2;2	sp|Q3T0K1|CALU_BOVIN Calumenin OS=Bos taurus OX=9913 GN=CALU PE=2 SV=1;tr|F1N3H1|F1N3H1_BOVIN Calumenin OS=Bos taurus OX=9913 GN=CALU PE=1 SV=1;tr|A0A3Q1NC75|A0A3Q1NC75_BOVIN Calumenin OS=Bos taurus OX=9913 GN=CALU PE=1 SV=1	3	2	2	2	1	1	0	2	2	0	1	1	0	2	2	0	1	1	0	2	2	0	4.1	4.1	4.1	37.082	315	315;315;315	3	2	4	0	12.051	By MS/MS	By MS/MS		By MS/MS	By MS/MS		3.5
A0A3Q1NJ03;CON__ENSEMBL:ENSBTAP00000013050;A5PJ69	A0A3Q1NJ03	SERPINA10	Matrisome Associated	ECM Regulators	A0A3Q1NJ03;CON__ENSEMBL:ENSBTAP00000013050;A5PJ69	2;2;2	2;2;2	2;2;2	tr|A0A3Q1NJ03|A0A3Q1NJ03_BOVIN Serpin family A member 10 OS=Bos taurus OX=9913 GN=SERPINA10 PE=3 SV=1;;tr|A5PJ69|A5PJ69_BOVIN SERPINA10 protein OS=Bos taurus OX=9913 GN=SERPINA10 PE=2 SV=1	3	2	2	2	1	1	1	1	2	0	1	1	1	1	2	0	1	1	1	1	2	0	5.1	5.1	5.1	47.19	409	409;452;452	2.5	3	3	0	12.288	By MS/MS	By MS/MS	By MS/MS	By MS/MS	By MS/MS		2.4
A0A3Q1NLX2;F1MUV1	A0A3Q1NLX2	FAAH	Membrane	0	A0A3Q1NLX2;F1MUV1	1;1	1;1	1;1	tr|A0A3Q1NLX2|A0A3Q1NLX2_BOVIN Fatty acid amide hydrolase OS=Bos taurus OX=9913 GN=FAAH PE=3 SV=1;tr|F1MUV1|F1MUV1_BOVIN Fatty acid amide hydrolase OS=Bos taurus OX=9913 GN=FAAH PE=3 SV=1	2	1	1	1	0	0	0	0	0	1	0	0	0	0	0	1	0	0	0	0	0	1	2.3	2.3	2.3	62.19	573	573;579	4		1	0.010127	6.1618						By MS/MS	0
A0A3S5ZP35	A0A3S5ZP35	BZW2	Cytosolic	0	A0A3S5ZP35	1	1	1	tr|A0A3S5ZP35|A0A3S5ZP35_BOVIN Basic leucine zipper and W2 domains 2 OS=Bos taurus OX=9913 GN=BZW2 PE=3 SV=1	1	1	1	1	1	1	1	1	1	0	1	1	1	1	1	0	1	1	1	1	1	0	2.1	2.1	2.1	57.764	513	513	2.2	3	2	1	-2	By MS/MS	By MS/MS	By MS/MS	By MS/MS	By MS/MS		2.1
A0A3S5ZPB0	A0A3S5ZPB0	ALDOC	Cytosolic	0	A0A3S5ZPB0	1	1	1	tr|A0A3S5ZPB0|A0A3S5ZPB0_BOVIN Fructose-bisphosphate aldolase OS=Bos taurus OX=9913 GN=ALDOC PE=1 SV=1	1	1	1	1	1	1	1	1	1	0	1	1	1	1	1	0	1	1	1	1	1	0	4.5	4.5	4.5	55.655	510	510	2.2	3	2	0	29.884	By MS/MS	By MS/MS	By MS/MS	By MS/MS	By MS/MS		4.5
Q3SYW2;A0A3S5ZPC6	Q3SYW2	C2	Cytosolic	0	Q3SYW2;A0A3S5ZPC6	1;1	1;1	1;1	sp|Q3SYW2|CO2_BOVIN Complement C2 OS=Bos taurus OX=9913 GN=C2 PE=2 SV=1;tr|A0A3S5ZPC6|A0A3S5ZPC6_BOVIN C3/C5 convertase OS=Bos taurus OX=9913 GN=C2 PE=4 SV=1	2	1	1	1	0	1	0	1	1	0	0	1	0	1	1	0	0	1	0	1	1	0	1.2	1.2	1.2	82.905	750	750;787	3	1	2	0	6.8962		By MS/MS		By matching	By MS/MS		0
A0A452DHZ5;Q0P569	A0A452DHZ5	NUCB1	Nuclear	0	A0A452DHZ5;Q0P569	3;3	3;3	3;3	tr|A0A452DHZ5|A0A452DHZ5_BOVIN Nucleobindin-1 OS=Bos taurus OX=9913 GN=NUCB1 PE=3 SV=1;sp|Q0P569|NUCB1_BOVIN Nucleobindin-1 OS=Bos taurus OX=9913 GN=NUCB1 PE=1 SV=1	2	3	3	3	2	2	2	2	2	1	2	2	2	2	2	1	2	2	2	2	2	1	9	9	9	53.28	457	457;474	2.36	6	5	0	18.886	By MS/MS	By MS/MS	By matching	By MS/MS	By MS/MS	By matching	6.8
A0A452DI46;Q29451	A0A452DI46	MAN2B1	Cytosolic	0	A0A452DI46;Q29451	3;3	3;3	3;3	tr|A0A452DI46|A0A452DI46_BOVIN Alpha-mannosidase OS=Bos taurus OX=9913 GN=MAN2B1 PE=3 SV=1;sp|Q29451|MA2B1_BOVIN Lysosomal alpha-mannosidase OS=Bos taurus OX=9913 GN=MAN2B1 PE=1 SV=4	2	3	3	3	3	3	3	3	3	0	3	3	3	3	3	0	3	3	3	3	3	0	3.7	3.7	3.7	110.78	982	982;999	2.12	10	6	0	23.685	By MS/MS	By MS/MS	By MS/MS	By MS/MS	By MS/MS		3.7
Q32KL7;A0A452DI77	Q32KL7	SPESP1	Cytosolic	0	Q32KL7;A0A452DI77	1;1	1;1	1;1	sp|Q32KL7|SPESP_BOVIN Sperm equatorial segment protein 1 OS=Bos taurus OX=9913 GN=SPESP1 PE=2 SV=1;tr|A0A452DI77|A0A452DI77_BOVIN Sperm equatorial segment protein 1 OS=Bos taurus OX=9913 GN=SPESP1 PE=4 SV=1	2	1	1	1	1	1	1	0	0	0	1	1	1	0	0	0	1	1	1	0	0	0	5.2	5.2	5.2	41.409	366	366;369	1	3		0.0054795	6.3476	By MS/MS	By MS/MS	By MS/MS				5.2
P00829;A0A452DII8	P00829	ATP5F1B ATP5B	Cytosolic	0	P00829;A0A452DII8	5;5	5;5	5;5	sp|P00829|ATPB_BOVIN ATP synthase subunit beta, mitochondrial OS=Bos taurus OX=9913 GN=ATP5F1B PE=1 SV=2;tr|A0A452DII8|A0A452DII8_BOVIN ATP synthase subunit beta OS=Bos taurus OX=9913 GN=ATP5F1B PE=3 SV=1	2	5	5	5	1	1	1	5	5	1	1	1	1	5	5	1	1	1	1	5	5	1	11.7	11.7	11.7	56.283	528	528;583	3.36	3	11	0	32.503	By MS/MS	By MS/MS	By MS/MS	By MS/MS	By MS/MS	By matching	3.6
A0A452DIQ5;P01966;CON__P01966	A0A452DIQ5	HBA1	Cytosolic	0	A0A452DIQ5;P01966;CON__P01966	1;1;1	1;1;1	1;1;1	tr|A0A452DIQ5|A0A452DIQ5_BOVIN GLOBIN domain-containing protein OS=Bos taurus OX=9913 GN=HBA1 PE=3 SV=1;sp|P01966|HBA_BOVIN Hemoglobin subunit alpha OS=Bos taurus OX=9913 GN=HBA PE=1 SV=2;	3	1	1	1	1	1	1	0	0	0	1	1	1	0	0	0	1	1	1	0	0	0	11	11	11	14.162	136	136;142;142	1	3		0.0027624	6.3594	By MS/MS	By MS/MS	By matching				11
P79105;A0A452DJ46	P79105	S100A12 CAAF1	Cytosolic	0	P79105;A0A452DJ46	1;1	1;1	1;1	sp|P79105|S10AC_BOVIN Protein S100-A12 OS=Bos taurus OX=9913 GN=S100A12 PE=1 SV=3;tr|A0A452DJ46|A0A452DJ46_BOVIN Protein S100 OS=Bos taurus OX=9913 GN=S100A12 PE=1 SV=1	2	1	1	1	0	0	0	1	1	0	0	0	0	1	1	0	0	0	0	1	1	0	26.1	26.1	26.1	10.685	92	92;95	4		2	0	6.9953				By MS/MS	By MS/MS		0
A0A452DJ82;P19803;G3MW01	A0A452DJ82	ARHGDIA	Nuclear	0	A0A452DJ82;P19803;G3MW01	3;3;2	3;3;2	3;3;2	tr|A0A452DJ82|A0A452DJ82_BOVIN Rho GDP-dissociation inhibitor 1 OS=Bos taurus OX=9913 GN=ARHGDIA PE=3 SV=1;sp|P19803|GDIR1_BOVIN Rho GDP-dissociation inhibitor 1 OS=Bos taurus OX=9913 GN=ARHGDIA PE=1 SV=3;tr|G3MW01|G3MW01_BOVIN Rho GDP-dissociation inhibit	3	3	3	3	2	3	2	2	2	1	2	3	2	2	2	1	2	3	2	2	2	1	14	14	14	32.797	299	299;204;173	2	10	5	0	18.47	By MS/MS	By MS/MS	By MS/MS	By MS/MS	By MS/MS	By MS/MS	8.7
Q9TTE1;CON__Q9TTE1;A2I7M9;A0A452DJK6;A0A0A0MP88;A0A3Q1N535;A6QPQ2	Q9TTE1	SERPINA3-1 SERPINA3A	Cytosolic	0	Q9TTE1;CON__Q9TTE1;A2I7M9;A0A452DJK6;A0A0A0MP88;A0A3Q1N535	8;8;8;8;6;6;1	8;8;8;8;6;6;1	2;2;2;2;2;2;0	sp|Q9TTE1|SPA31_BOVIN Serpin A3-1 OS=Bos taurus OX=9913 GN=SERPINA3-1 PE=1 SV=3;;sp|A2I7M9|SPA32_BOVIN Serpin A3-2 OS=Bos taurus OX=9913 GN=SERPINA3-2 PE=3 SV=1;tr|A0A452DJK6|A0A452DJK6_BOVIN Serpin A3-1 OS=Bos taurus OX=9913 GN=SERPINA3-1 PE=3 SV=1;tr|A0A	7	8	8	2	7	7	1	5	5	2	7	7	1	5	5	2	2	2	0	2	2	0	18.2	18.2	7.5	46.236	411	411;411;411;470;400;459;418	2.33	15	12	0	66.324	By MS/MS	By MS/MS	By MS/MS	By MS/MS	By MS/MS	By MS/MS	18.2
Q3ZCH5;A0A452DK44	Q3ZCH5	AZGP1	Cytosolic	0	Q3ZCH5;A0A452DK44	1;1	1;1	1;1	sp|Q3ZCH5|ZA2G_BOVIN Zinc-alpha-2-glycoprotein OS=Bos taurus OX=9913 GN=AZGP1 PE=2 SV=1;tr|A0A452DK44|A0A452DK44_BOVIN Zinc-alpha-2-glycoprotein OS=Bos taurus OX=9913 GN=AZGP1 PE=3 SV=1	2	1	1	1	1	0	1	0	0	0	1	0	1	0	0	0	1	0	1	0	0	0	5.4	5.4	5.4	33.851	299	299;299	1	2		0	13.461	By MS/MS		By MS/MS				5.4
A0JNF3	A0JNF3	FAM149B1	Cytosolic	0	A0JNF3	1	1	1	sp|A0JNF3|F149B_BOVIN Primary cilium assembly protein FAM149B1 OS=Bos taurus OX=9913 GN=FAM149B1 PE=2 SV=1	1	1	1	1	0	0	0	1	0	1	0	0	0	1	0	1	0	0	0	1	0	1	3.1	3.1	3.1	54.652	491	491	4		2	0	7.0127				By matching		By MS/MS	0
A1A4L7	A1A4L7	GSTM4 GSTM1	Cytosolic	0	A1A4L7	5	2	1	tr|A1A4L7|A1A4L7_BOVIN Glutathione transferase OS=Bos taurus OX=9913 GN=GSTM4 PE=2 SV=1	1	5	2	1	4	3	2	2	2	0	2	2	1	1	1	0	1	1	0	1	1	0	24.8	13.8	7.8	25.669	218	218	1.75	6	2	0	21.927	By MS/MS	By MS/MS	By MS/MS	By MS/MS	By matching		21.6
A1A4M9	A1A4M9	KRTAP13-1	Cytosolic	0	A1A4M9	2	2	2	tr|A1A4M9|A1A4M9_BOVIN Keratin associated protein 13-1 OS=Bos taurus OX=9913 GN=KRTAP13-1 PE=2 SV=1	1	2	2	2	0	0	0	0	0	2	0	0	0	0	0	2	0	0	0	0	0	2	20.7	20.7	20.7	17.747	164	164	4		2	0	20.063						By MS/MS	0
A1L578;E1BNE7	A1L578	CAVIN1 PTRF	Cytosolic	0	A1L578;E1BNE7	1;1	1;1	1;1	tr|A1L578|A1L578_BOVIN Caveolae associated protein 1 OS=Bos taurus OX=9913 GN=CAVIN1 PE=1 SV=1;tr|E1BNE7|E1BNE7_BOVIN Caveolae associated protein 1 OS=Bos taurus OX=9913 GN=CAVIN1 PE=1 SV=2	2	1	1	1	1	1	1	0	0	0	1	1	1	0	0	0	1	1	1	0	0	0	7.9	7.9	7.9	24.631	227	227;456	1	3		0	8.6806	By MS/MS	By MS/MS	By matching				7.9
CON__A2I7N1;A2I7N1	CON__A2I7N1	Cytosolic	Cytosolic	0	CON__A2I7N1;A2I7N1	8;8	2;2	0;0	;sp|A2I7N1|SPA35_BOVIN Serpin A3-5 OS=Bos taurus OX=9913 GN=SERPINA3-5 PE=3 SV=1	2	8	2	0	6	6	2	5	4	2	1	1	1	2	1	0	0	0	0	0	0	0	16.3	5.6	0	46.397	411	411;411	2.5	3	3	0	11.737	By MS/MS	By MS/MS	By MS/MS	By MS/MS	By MS/MS	By matching	13.6
A3KMY1	A3KMY1	KRT82	Cytoskeletal	0	A3KMY1	5	1	1	tr|A3KMY1|A3KMY1_BOVIN KRT82 protein OS=Bos taurus OX=9913 GN=KRT82 PE=2 SV=1	1	5	1	1	0	0	0	0	0	5	0	0	0	0	0	1	0	0	0	0	0	1	8.8	3.3	3.3	56.837	514	514	4		2	0.005277	6.2653						By MS/MS	0
A4FUZ0;A0A452DI61;F1N566	A4FUZ0	KRT83	Cytosolic	0	A4FUZ0;A0A452DI61	29;28;14	2;1;0	2;1;0	sp|A4FUZ0|KRT83_BOVIN Keratin, type II cuticular Hb3 OS=Bos taurus OX=9913 GN=KRT83 PE=2 SV=1;tr|A0A452DI61|A0A452DI61_BOVIN Keratin, type II cuticular Hb3 OS=Bos taurus OX=9913 GN=KRT83 PE=3 SV=1	3	29	2	2	0	0	0	1	1	29	0	0	0	0	0	2	0	0	0	0	0	2	42	6.9	6.9	53.989	493	493;509;474	4		2	0	15.092				By matching	By matching	By MS/MS	0
Q5E9E2;A4IF97	Q5E9E2	MYL9 MYRL2	Cytosolic	0	Q5E9E2;A4IF97	1;1	1;1	1;1	sp|Q5E9E2|MYL9_BOVIN Myosin regulatory light polypeptide 9 OS=Bos taurus OX=9913 GN=MYL9 PE=2 SV=3;sp|A4IF97|ML12B_BOVIN Myosin regulatory light chain 12B OS=Bos taurus OX=9913 GN=MYL12B PE=2 SV=1	2	1	1	1	1	1	1	1	1	0	1	1	1	1	1	0	1	1	1	1	1	0	6.4	6.4	6.4	19.865	172	172;171	2.2	3	2	0.0052493	6.2518	By MS/MS	By MS/MS	By MS/MS	By MS/MS	By MS/MS		6.4
A5D7D1;A0A3Q1MRU0;A0A3Q1MFS2;A0A3Q1MR52;A0A3Q1MBS5;Q3B7N2;A0A452DIE5;A0A3Q1MPS4;A0A3Q1MAJ8;A0A3Q1M6W4;A0A3Q1M2X5;Q3ZC55;A0A3Q1LWS8;Q0III9	A5D7D1	ACTN4	Cytoskeletal	0	A5D7D1;A0A3Q1MRU0;A0A3Q1MFS2;A0A3Q1MR52;A0A3Q1MBS5;Q3B7N2;A0A452DIE5;A0A3Q1MPS4;A0A3Q1MAJ8	5;4;4;3;3;3;3;3;3;1;1;1;1;1	5;4;4;3;3;3;3;3;3;1;1;1;1;1	5;4;4;3;3;3;3;3;3;1;1;1;1;1	sp|A5D7D1|ACTN4_BOVIN Alpha-actinin-4 OS=Bos taurus OX=9913 GN=ACTN4 PE=2 SV=1;tr|A0A3Q1MRU0|A0A3Q1MRU0_BOVIN Alpha-actinin-4 OS=Bos taurus OX=9913 GN=ACTN4 PE=1 SV=1;tr|A0A3Q1MFS2|A0A3Q1MFS2_BOVIN Alpha-actinin-4 OS=Bos taurus OX=9913 GN=ACTN4 PE=1 SV=1;t	14	5	5	5	3	4	2	0	0	0	3	4	2	0	0	0	3	4	2	0	0	0	6.8	6.8	6.8	104.93	911	911;980;1007;846;887;892;908;914;1032;822;888;894;897;901	1	9		0	29.389	By MS/MS	By MS/MS	By MS/MS				4.4
P38657;A5D7E8	P38657	PDIA3 GRP58	Cytosolic	0	P38657;A5D7E8	5;5	5;5	5;5	sp|P38657|PDIA3_BOVIN Protein disulfide-isomerase A3 OS=Bos taurus OX=9913 GN=PDIA3 PE=2 SV=1;tr|A5D7E8|A5D7E8_BOVIN Protein disulfide-isomerase OS=Bos taurus OX=9913 GN=PDIA3 PE=2 SV=1	2	5	5	5	5	5	3	4	4	0	5	5	3	4	4	0	5	5	3	4	4	0	10.5	10.5	10.5	56.929	505	505;505	2.3	13	10	0	32.462	By MS/MS	By MS/MS	By MS/MS	By MS/MS	By MS/MS		10.5
A5D984;Q1JPG7	A5D984	PKM PKM2	Cytosolic	0	A5D984	6;1	6;1	6;1	tr|A5D984|A5D984_BOVIN Pyruvate kinase OS=Bos taurus OX=9913 GN=PKM PE=1 SV=1	2	6	6	6	2	6	3	0	0	0	2	6	3	0	0	0	2	6	3	0	0	0	18.3	18.3	18.3	57.948	531	531;526	1	12		0	42.321	By MS/MS	By MS/MS	By MS/MS				6.2
Q1RMU3;A6QL77	Q1RMU3	P4HA1	Matrisome Associated	ECM Regulators	Q1RMU3;A6QL77	1;1	1;1	1;1	sp|Q1RMU3|P4HA1_BOVIN Prolyl 4-hydroxylase subunit alpha-1 OS=Bos taurus OX=9913 GN=P4HA1 PE=1 SV=1;tr|A6QL77|A6QL77_BOVIN Procollagen-proline 4-dioxygenase OS=Bos taurus OX=9913 GN=P4HA1 PE=2 SV=1	2	1	1	1	1	1	1	1	1	0	1	1	1	1	1	0	1	1	1	1	1	0	2.2	2.2	2.2	61.009	534	534;534	2.2	3	2	0.0030395	6.6146	By MS/MS	By MS/MS	By MS/MS	By MS/MS	By MS/MS		2.2
A6QLB2	A6QLB2	DDX23	Nuclear	0	A6QLB2	1	1	1	tr|A6QLB2|A6QLB2_BOVIN RNA helicase OS=Bos taurus OX=9913 GN=DDX23 PE=2 SV=1	1	1	1	1	0	0	0	0	0	1	0	0	0	0	0	1	0	0	0	0	0	1	1.3	1.3	1.3	95.653	820	820	4		1	0.0098039	6.1291						By MS/MS	0
A6QLZ3	A6QLZ3	ARSB	Cytosolic	0	A6QLZ3	1	1	1	tr|A6QLZ3|A6QLZ3_BOVIN ARSB protein OS=Bos taurus OX=9913 GN=ARSB PE=2 SV=1	1	1	1	1	1	1	1	1	1	0	1	1	1	1	1	0	1	1	1	1	1	0	1.9	1.9	1.9	59.355	533	533	2.2	3	2	0.0099256	6.1412	By MS/MS	By MS/MS	By MS/MS	By MS/MS	By MS/MS		1.9
A6QNW7;CON__ENSEMBL:ENSBTAP00000031360;A0A3Q1MHR7	A6QNW7	CD5L	Membrane	0	A6QNW7;CON__ENSEMBL:ENSBTAP00000031360;A0A3Q1MHR7	2;1;1	2;1;1	2;1;1	tr|A6QNW7|A6QNW7_BOVIN CD5 molecule like OS=Bos taurus OX=9913 GN=CD5L PE=2 SV=1;;tr|A0A3Q1MHR7|A0A3Q1MHR7_BOVIN Uncharacterized protein OS=Bos taurus OX=9913 GN=LOC787904 PE=4 SV=1	3	2	2	2	2	2	0	1	1	0	2	2	0	1	1	0	2	2	0	1	1	0	5.5	5.5	5.5	50.211	451	451;491;532	1.86	5	2	0	12.928	By MS/MS	By MS/MS		By matching	By MS/MS		5.5
A6QP90	A6QP90	KRT32	Cytoskeletal	0	A6QP90	5	2	2	tr|A6QP90|A6QP90_BOVIN KRT32 protein OS=Bos taurus OX=9913 GN=KRT32 PE=2 SV=1	1	5	2	2	0	0	0	1	1	5	0	0	0	0	0	2	0	0	0	0	0	2	12.8	5.7	5.7	46.536	405	405	4		3	0	13.58				By matching	By matching	By MS/MS	0
F1MAV8;A6QP92	F1MAV8	TCHHL1	Matrisome Associated	Secreted Factors	F1MAV8;A6QP92	1;1	1;1	1;1	tr|F1MAV8|F1MAV8_BOVIN Trichohyalin-like protein 1 OS=Bos taurus OX=9913 GN=TCHHL1 PE=3 SV=2;sp|A6QP92|TCHL1_BOVIN Trichohyalin-like protein 1 OS=Bos taurus OX=9913 GN=TCHHL1 PE=2 SV=2	2	1	1	1	0	0	0	1	1	0	0	0	0	1	1	0	0	0	0	1	1	0	1.5	1.5	1.5	95.801	872	872;872	4		2	1	-2				By MS/MS	By MS/MS		0
P34933;A7E3Q2	P34933	HSPA2 HSP70-3 HSPA3	Cytosolic	0	P34933;A7E3Q2	10;10	10;10	6;6	sp|P34933|HSP72_BOVIN Heat shock-related 70 kDa protein 2 OS=Bos taurus OX=9913 GN=HSPA2 PE=2 SV=2;tr|A7E3Q2|A7E3Q2_BOVIN Heat shock 70kDa protein 1A OS=Bos taurus OX=9913 GN=HSPA2 PE=2 SV=1	2	10	10	6	8	9	3	7	7	2	8	9	3	7	7	2	4	5	1	4	4	1	12.6	12.6	8.2	69.739	636	636;636	2.16	27	17	0	84.958	By MS/MS	By MS/MS	By MS/MS	By MS/MS	By MS/MS	By MS/MS	11
A7E3Q8;F1MSB7	A7E3Q8	PLS3	Cytoskeletal	0	A7E3Q8;F1MSB7	2;2	1;1	1;1	sp|A7E3Q8|PLST_BOVIN Plastin-3 OS=Bos taurus OX=9913 GN=PLS3 PE=2 SV=1;tr|F1MSB7|F1MSB7_BOVIN Plastin-3 OS=Bos taurus OX=9913 GN=PLS3 PE=1 SV=1	2	2	1	1	1	2	1	1	1	0	1	1	1	1	1	0	1	1	1	1	1	0	3.5	1.4	1.4	70.797	630	630;639	2	4	2	0.0029762	6.5525	By MS/MS	By MS/MS	By MS/MS	By matching	By MS/MS		1.4
A7E3S4	A7E3S4	RAF1	Nuclear	0	A7E3S4	1	1	1	sp|A7E3S4|RAF1_BOVIN RAF proto-oncogene serine/threonine-protein kinase OS=Bos taurus OX=9913 GN=RAF1 PE=2 SV=1	1	1	1	1	0	0	0	0	0	1	0	0	0	0	0	1	0	0	0	0	0	1	1.2	1.2	1.2	72.874	648	648	4		1	1	-2						By MS/MS	0
A7MBB9	A7MBB9	CDKN2C	Nuclear	0	A7MBB9	1	1	1	tr|A7MBB9|A7MBB9_BOVIN CDKN2C protein OS=Bos taurus OX=9913 GN=CDKN2C PE=2 SV=1	1	1	1	1	1	1	1	0	0	0	1	1	1	0	0	0	1	1	1	0	0	0	5.4	5.4	5.4	18.325	168	168	1	3		1	-2	By matching	By matching	By MS/MS				5.4
A7YWG4	A7YWG4	GGH	Cytosolic	0	A7YWG4	2	2	2	sp|A7YWG4|GGH_BOVIN Gamma-glutamyl hydrolase OS=Bos taurus OX=9913 GN=GGH PE=2 SV=1	1	2	2	2	2	2	1	1	1	0	2	2	1	1	1	0	2	2	1	1	1	0	5.7	5.7	5.7	35.683	318	318	1.86	5	2	0	11.79	By MS/MS	By MS/MS	By MS/MS	By MS/MS	By matching		5.7
A7YY66	A7YY66	CREB3L2	Nuclear	0	A7YY66	1	1	1	tr|A7YY66|A7YY66_BOVIN Cyclic AMP-responsive element-binding protein 3-like protein 2 OS=Bos taurus OX=9913 GN=CREB3L2 PE=2 SV=1	1	1	1	1	0	0	0	0	0	1	0	0	0	0	0	1	0	0	0	0	0	1	1.9	1.9	1.9	57.582	520	520	4		1	1	-2						By MS/MS	0
P68252;A7Z057	P68252	YWHAG	Cytosolic	0	P68252;A7Z057	1;1	1;1	1;1	sp|P68252|1433G_BOVIN 14-3-3 protein gamma OS=Bos taurus OX=9913 GN=YWHAG PE=1 SV=2;tr|A7Z057|A7Z057_BOVIN 14-3-3 protein gamma OS=Bos taurus OX=9913 GN=YWHAG PE=2 SV=1	2	1	1	1	1	1	0	1	1	1	1	1	0	1	1	1	1	1	0	1	1	1	5.7	5.7	5.7	28.252	247	247;247	2.8	2	3	0	7.69	By MS/MS	By MS/MS		By matching	By MS/MS	By MS/MS	5.7
CON__A2AB72	CON__A2AB72	Cytosolic	Cytosolic	0	CON__A2AB72	3	2	2		1	3	2	2	0	0	0	1	1	3	0	0	0	0	0	2	0	0	0	0	0	2	4	2.4	2.4	51.152	453	453	4		5	0	14.326				By matching	By matching	By MS/MS	0
CON__ENSEMBL:ENSBTAP00000006074;P35445	CON__ENSEMBL:ENSBTAP00000006074	Cytosolic	Cytosolic	0	CON__ENSEMBL:ENSBTAP00000006074;P35445	2;2	2;2	2;2	;sp|P35445|COMP_BOVIN Cartilage oligomeric matrix protein OS=Bos taurus OX=9913 GN=COMP PE=1 SV=2	2	2	2	2	2	0	0	2	2	0	2	0	0	2	2	0	2	0	0	2	2	0	3.2	3.2	3.2	80.674	747	747;756	3	2	4	0	12.805	By MS/MS			By MS/MS	By MS/MS		3.2
CON__ENSEMBL:ENSBTAP00000014147;A0A3Q1M1Z4;A0A3Q1LSF0;A0A3Q1LFA6;A0A3Q1MNY1;A0A3Q1MQ22;A0A3Q1MIN7	CON__ENSEMBL:ENSBTAP00000014147	Cytosolic	Cytosolic	0	CON__ENSEMBL:ENSBTAP00000014147;A0A3Q1M1Z4;A0A3Q1LSF0	3;2;2;1;1;1;1	3;2;2;1;1;1;1	2;1;1;0;0;0;0	;tr|A0A3Q1M1Z4|A0A3Q1M1Z4_BOVIN Ig-like domain-containing protein OS=Bos taurus OX=9913 PE=4 SV=1;tr|A0A3Q1LSF0|A0A3Q1LSF0_BOVIN Ig-like domain-containing protein OS=Bos taurus OX=9913 PE=4 SV=1	7	3	3	2	3	3	3	3	3	1	3	3	3	3	3	1	2	2	2	2	2	1	40.7	40.7	26.5	11.756	113	113;128;142;128;131;163;191	2.29	16	12	0	103.69	By MS/MS	By MS/MS	By MS/MS	By MS/MS	By MS/MS	By MS/MS	40.7
CON__ENSEMBL:ENSBTAP00000024462	CON__ENSEMBL:ENSBTAP00000024462	Cytosolic	Cytosolic	0	CON__ENSEMBL:ENSBTAP00000024462	14	14	0		1	14	14	0	10	11	6	11	11	3	10	11	6	11	11	3	0	0	0	0	0	0	32	32	0	46.543	419	419	2.46	37	35	0	321.65	By MS/MS	By MS/MS	By MS/MS	By MS/MS	By MS/MS	By MS/MS	24.6
CON__ENSEMBL:ENSBTAP00000024466	CON__ENSEMBL:ENSBTAP00000024466	Cytosolic	Cytosolic	0	CON__ENSEMBL:ENSBTAP00000024466	9	1	1		1	9	1	1	6	7	4	8	7	2	1	1	1	1	1	1	1	1	1	1	1	1	25.2	2.7	2.7	43.9	401	401	2.5	3	3	0.003012	6.5709	By MS/MS	By MS/MS	By MS/MS	By MS/MS	By MS/MS	By MS/MS	19.2
G3N0V2;CON__ENSEMBL:ENSBTAP00000038253	G3N0V2	KRT1	Cytoskeletal	0	G3N0V2;CON__ENSEMBL:ENSBTAP00000038253	10;10	1;1	1;1	tr|G3N0V2|G3N0V2_BOVIN Cytokeratin-1 OS=Bos taurus OX=9913 GN=KRT1 PE=1 SV=2;	2	10	1	1	5	3	9	3	3	7	0	0	0	0	0	1	0	0	0	0	0	1	11.7	1.8	1.8	63.165	606	606;606	4		1	0.002849	6.4405	By matching	By matching	By matching	By matching	By matching	By MS/MS	8.1
CON__O43790;F1N362;E1BIL2;A0A3Q1LGW7	CON__O43790	Cytosolic	Cytosolic	0	CON__O43790	39;2;1;1	39;2;1;1	4;0;0;0		4	39	39	4	0	0	0	1	1	39	0	0	0	1	1	39	0	0	0	0	0	4	67.1	67.1	13.6	53.5	486	486;593;599;612	4		74	0	323.31				By MS/MS	By MS/MS	By MS/MS	0
CON__Q6NTB9;CON__O76009	CON__Q6NTB9	Cytosolic	Cytosolic	0	CON__Q6NTB9;CON__O76009	21;21	11;11	5;5	;	2	21	11	5	0	0	0	1	2	21	0	0	0	0	1	11	0	0	0	0	0	5	45.3	27	15.6	45.968	404	404;404	4		23	0	323.31				By matching	By matching	By MS/MS	0
CON__O76013	CON__O76013	Cytosolic	Cytosolic	0	CON__O76013	10	4	2		1	10	4	2	0	0	0	2	1	10	0	0	0	1	0	4	0	0	0	1	0	2	16.7	8.1	3.4	52.247	467	467	4		5	0	24.745				By MS/MS	By matching	By MS/MS	0
CON__O95678	CON__O95678	Cytosolic	Cytosolic	0	CON__O95678	11	2	0		1	11	2	0	3	2	6	3	2	10	0	0	0	0	0	2	0	0	0	0	0	0	12.7	2.2	0	59.504	551	551	4		3	0	13.166	By matching	By matching	By matching	By matching	By matching	By MS/MS	5.3
CON__P00761	CON__P00761	Cytosolic	Cytosolic	0	CON__P00761	3	3	3		1	3	3	3	3	3	3	3	3	3	3	3	3	3	3	3	3	3	3	3	3	3	16.5	16.5	16.5	24.409	231	231	2.3	21	16	0	172.02	By MS/MS	By MS/MS	By MS/MS	By MS/MS	By MS/MS	By MS/MS	16.5
CON__P02533;A0A3Q1LSG0;A0A3Q1NAZ1	CON__P02533	Cytosolic	Cytosolic	0	CON__P02533	16;4;1	15;3;1	1;0;0		3	16	15	1	1	0	10	4	3	13	1	0	10	3	2	12	0	0	1	0	0	0	32	30.5	3.2	51.621	472	472;453;230	2.82	11	17	0	247.69	By MS/MS		By MS/MS	By MS/MS	By MS/MS	By MS/MS	1.9
CON__P02538;CON__P48668;M0QVY0;F1MUY2;F1MKE7;CON__Q8VED5;CON__Q5XKE5	CON__P02538	Cytosolic	Cytosolic	0	CON__P02538;CON__P48668;M0QVY0	21;20;11;9;9;8;4	12;11;2;0;0;2;0	2;1;0;0;0;0;0	;;tr|M0QVY0|M0QVY0_BOVIN IF rod domain-containing protein OS=Bos taurus OX=9913 GN=KRT6A PE=3 SV=1	7	21	12	2	6	3	13	5	3	16	4	1	6	2	1	8	1	0	1	1	0	1	33	24.6	4.8	60.044	564	564;564;571;571;571;531;535	2.57	11	12	0	161.34	By MS/MS	By MS/MS	By MS/MS	By MS/MS	By MS/MS	By MS/MS	10.6
CON__P02768-1	CON__P02768-1	Cytosolic	Cytosolic	0	CON__P02768-1	12	7	7		1	12	7	7	7	7	7	9	8	8	3	3	2	4	4	4	3	3	2	4	4	4	15.9	10.3	10.3	69.366	609	609	2.91	8	14	0	42.584	By MS/MS	By MS/MS	By MS/MS	By MS/MS	By MS/MS	By MS/MS	8
CON__P04258;Q08E14;P04258	CON__P04258	Cytosolic	Cytosolic	0	CON__P04258;Q08E14;P04258	7;7;6	7;7;6	7;7;6	;tr|Q08E14|Q08E14_BOVIN Collagen alpha-1(III) chain OS=Bos taurus OX=9913 GN=COL3A1 PE=2 SV=1;sp|P04258|CO3A1_BOVIN Collagen alpha-1(III) chain OS=Bos taurus OX=9913 GN=COL3A1 PE=1 SV=1	3	7	7	7	6	7	4	4	4	2	6	7	4	4	4	2	6	7	4	4	4	2	7.3	7.3	7.3	138.44	1466	1466;1466;1049	2.14	18	11	0	105.55	By MS/MS	By MS/MS	By MS/MS	By MS/MS	By MS/MS	By MS/MS	6.2
CON__P04259	CON__P04259	Cytosolic	Cytosolic	0	CON__P04259	20	1	1		1	20	1	1	5	3	13	4	3	16	0	0	1	0	0	1	0	0	1	0	0	1	31.2	3	3	59.998	564	564	2.5	1	1	0	8.6933	By matching	By matching	By MS/MS	By matching	By matching	By MS/MS	8.9
CON__P04264;CON__H-INV:HIT000016045;CON__Q9R0H5	CON__P04264	Cytosolic	Cytosolic	0	CON__P04264	32;4;1	32;4;1	20;0;0		3	32	32	20	17	14	26	16	14	30	17	14	26	16	14	30	11	10	17	11	9	19	48.1	48.1	37	66.017	644	644;99;524	2.64	67	81	0	323.31	By MS/MS	By MS/MS	By MS/MS	By MS/MS	By MS/MS	By MS/MS	32.5
CON__P08779	CON__P08779	Cytosolic	Cytosolic	0	CON__P08779	15	6	6		1	15	6	6	2	1	8	5	4	13	1	1	3	1	1	5	1	1	3	1	1	5	32.1	15.9	15.9	51.267	473	473	2.75	5	7	0	64.966	By MS/MS	By MS/MS	By MS/MS	By MS/MS	By MS/MS	By MS/MS	3.6
CON__P13645;P06394;A6QNZ7;CON__P02535-1;CON__Q7Z3Y7;A0A3Q1N5C7;Q148H6;CON__Q148H6	CON__P13645	Cytosolic	Cytosolic	0	CON__P13645	23;9;9;6;3;2;2;2	23;9;9;6;3;2;2;2	18;5;5;5;0;0;0;0		8	23	23	18	13	7	16	12	7	23	13	7	16	12	7	23	11	5	14	10	6	18	38.6	38.6	34.2	59.51	593	593;526;526;570;486;429;464;464	2.76	40	57	0	323.31	By MS/MS	By MS/MS	By MS/MS	By MS/MS	By MS/MS	By MS/MS	22.6
CON__P13647	CON__P13647	Cytosolic	Cytosolic	0	CON__P13647	19	9	3		1	19	9	3	3	3	14	5	3	14	0	0	7	2	1	6	0	0	1	1	0	3	26.3	16.6	6.3	62.378	590	590	2.76	7	10	0	135.02	By matching	By matching	By MS/MS	By MS/MS	By MS/MS	By MS/MS	4.7
CON__P15497;P15497;A0A3Q1MJJ4	CON__P15497	Cytosolic	Cytosolic	0	CON__P15497;P15497;A0A3Q1MJJ4	8;8;7	8;8;7	8;8;7	;sp|P15497|APOA1_BOVIN Apolipoprotein A-I OS=Bos taurus OX=9913 GN=APOA1 PE=1 SV=3;tr|A0A3Q1MJJ4|A0A3Q1MJJ4_BOVIN Apolipoprotein A-I OS=Bos taurus OX=9913 GN=APOA1 PE=1 SV=1	3	8	8	8	7	7	6	5	5	0	7	7	6	5	5	0	7	7	6	5	5	0	32.8	32.8	32.8	30.276	265	265;265;250	1.91	23	10	0	79.849	By MS/MS	By MS/MS	By MS/MS	By MS/MS	By MS/MS		28.3
CON__P15636	CON__P15636	Cytosolic	Cytosolic	0	CON__P15636	13	13	13		1	13	13	13	3	3	10	3	3	13	3	3	10	3	3	13	3	3	10	3	3	13	15	15	15	68.124	653	653	2.77	34	49	0	323.31	By MS/MS	By MS/MS	By MS/MS	By MS/MS	By MS/MS	By MS/MS	7.8
P17697;CON__P17697	P17697	CLU	Cytoskeletal	0	P17697;CON__P17697	1;1	1;1	1;1	sp|P17697|CLUS_BOVIN Clusterin OS=Bos taurus OX=9913 GN=CLU PE=1 SV=1;	2	1	1	1	1	1	1	1	1	0	1	1	1	1	1	0	1	1	1	1	1	0	2.7	2.7	2.7	51.113	439	439;439	2.2	3	2	0	16.569	By MS/MS	By MS/MS	By MS/MS	By MS/MS	By MS/MS		2.7
CON__P19001	CON__P19001	Cytosolic	Cytosolic	0	CON__P19001	4	1	1		1	4	1	1	1	0	2	2	2	3	0	0	0	0	0	1	0	0	0	0	0	1	8.7	2.5	2.5	44.541	403	403	4		1	0.005102	6.1826	By matching		By matching	By matching	By matching	By MS/MS	2.2
P28800;CON__P28800	P28800	SERPINF2 PLI	Cytosolic	0	P28800;CON__P28800	2;2	2;2	2;2	sp|P28800|A2AP_BOVIN Alpha-2-antiplasmin OS=Bos taurus OX=9913 GN=SERPINF2 PE=1 SV=2;	2	2	2	2	1	1	0	0	1	0	1	1	0	0	1	0	1	1	0	0	1	0	4.5	4.5	4.5	54.71	492	492;492	2	2	1	0	11.72	By MS/MS	By MS/MS			By MS/MS		1.8
P34955;CON__P34955	P34955	SERPINA1 PI	Cytosolic	0	P34955;CON__P34955	7;7	7;7	7;7	sp|P34955|A1AT_BOVIN Alpha-1-antiproteinase OS=Bos taurus OX=9913 GN=SERPINA1 PE=1 SV=1;	2	7	7	7	6	6	4	6	5	2	6	6	4	6	5	2	6	6	4	6	5	2	12.5	12.5	12.5	46.103	416	416;416	2.54	17	18	0	55.14	By MS/MS	By MS/MS	By MS/MS	By MS/MS	By MS/MS	By MS/MS	10.3
CON__P35527	CON__P35527	Cytosolic	Cytosolic	0	CON__P35527	14	14	14		1	14	14	14	6	7	11	10	6	13	6	7	11	10	6	13	6	7	11	10	6	13	33.4	33.4	33.4	62.129	623	623	2.67	27	34	0	323.31	By MS/MS	By MS/MS	By MS/MS	By MS/MS	By MS/MS	By MS/MS	12.7
CON__P35908v2;CON__P35908	CON__P35908v2	Cytosolic	Cytosolic	0	CON__P35908v2;CON__P35908	28;27	24;23	15;14	;	2	28	24	15	10	9	18	10	7	21	8	7	15	8	5	17	5	4	7	5	3	12	44.3	41.2	31.5	65.432	639	639;645	2.57	31	34	0	323.31	By MS/MS	By MS/MS	By MS/MS	By MS/MS	By MS/MS	By MS/MS	18
P50448;E1BMJ0;CON__P50448	P50448	0	Cytosolic	0	P50448;E1BMJ0;CON__P50448	3;3;3	3;3;3	3;3;3	sp|P50448|F12AI_BOVIN Factor XIIa inhibitor OS=Bos taurus OX=9913 PE=1 SV=1;tr|E1BMJ0|E1BMJ0_BOVIN Serpin family G member 1 OS=Bos taurus OX=9913 GN=SERPING1 PE=3 SV=3;	3	3	3	3	2	2	0	0	0	0	2	2	0	0	0	0	2	2	0	0	0	0	7.5	7.5	7.5	51.723	468	468;468;468	1	4		0	21.535	By MS/MS	By MS/MS					5.3
CON__P78386	CON__P78386	Cytosolic	Cytosolic	0	CON__P78386	39	19	9		1	39	19	9	0	0	0	1	2	39	0	0	0	0	1	19	0	0	0	0	1	9	59.4	33.5	23.1	55.802	507	507	4		29	0	323.31				By matching	By matching	By MS/MS	0
CON__Q04695;CON__Q9QWL7	CON__Q04695	Cytosolic	Cytosolic	0	CON__Q04695;CON__Q9QWL7	13;12	3;2	1;0	;	2	13	3	1	1	0	6	2	2	12	0	0	1	0	0	3	0	0	0	0	0	1	22.7	7.6	3	48.105	432	432;433	3.25	1	3	0	19.271	By matching		By MS/MS	By matching	By matching	By MS/MS	2.1
Q05443;CON__Q05443	Q05443	LUM LDC	Cytosolic	0	Q05443;CON__Q05443	5;5	5;5	5;5	sp|Q05443|LUM_BOVIN Lumican OS=Bos taurus OX=9913 GN=LUM PE=1 SV=1;	2	5	5	5	4	5	4	0	0	0	4	5	4	0	0	0	4	5	4	0	0	0	14.3	14.3	14.3	38.756	342	342;342	1	14		0	29.677	By MS/MS	By MS/MS	By MS/MS				11.7
CON__Q29443;Q29443;G3X6N3;CON__Q0IIK2;E1BI82;CON__Q2HJF0;A0A3Q1MUV9;A0A3Q1NEQ0	CON__Q29443	Cytosolic	Cytosolic	0	CON__Q29443;Q29443;G3X6N3;CON__Q0IIK2	36;36;36;36;1;1;1;1	36;36;36;36;1;1;1;1	34;34;34;34;1;1;1;1	;sp|Q29443|TRFE_BOVIN Serotransferrin OS=Bos taurus OX=9913 GN=TF PE=2 SV=1;tr|G3X6N3|G3X6N3_BOVIN Beta-1 metal-binding globulin OS=Bos taurus OX=9913 GN=TF PE=1 SV=2;	8	36	36	34	27	26	23	29	28	14	27	26	23	29	28	14	26	25	22	28	27	12	54.7	54.7	52.3	75.829	685	685;704;704;704;622;622;650;703	2.32	146	115	0	323.31	By MS/MS	By MS/MS	By MS/MS	By MS/MS	By MS/MS	By MS/MS	40.7
CON__Q14525	CON__Q14525	Cytosolic	Cytosolic	0	CON__Q14525	22	21	6		1	22	21	6	0	0	0	3	4	22	0	0	0	2	3	21	0	0	0	1	1	6	47.8	46	17.6	46.213	404	404	4		38	0	323.31				By MS/MS	By MS/MS	By MS/MS	0
CON__Q14532	CON__Q14532	Cytosolic	Cytosolic	0	CON__Q14532	7	3	3		1	7	3	3	0	0	0	1	1	7	0	0	0	0	0	3	0	0	0	0	0	3	17	7.8	7.8	50.319	448	448	4		3	0	20.664				By matching	By matching	By MS/MS	0
CON__Q14533	CON__Q14533	Cytosolic	Cytosolic	0	CON__Q14533	37	3	2		1	37	3	2	0	0	0	1	1	37	0	0	0	0	0	3	0	0	0	0	0	2	56	7.7	5	54.971	505	505	4		5	0	20.34				By matching	By matching	By MS/MS	0
CON__Q9UE12;CON__Q15323	CON__Q9UE12	Cytosolic	Cytosolic	0	CON__Q9UE12;CON__Q15323	19;19	4;4	4;4	;	2	19	4	4	0	0	0	2	4	19	0	0	0	0	1	4	0	0	0	0	1	4	41.1	8.7	8.7	47.237	416	416;416	4		7	0	256.49				By matching	By matching	By MS/MS	0
CON__Q1RMK2;G5E513;A0A3Q1M032;A0A3Q1LPI6;A0A3Q1MI29;A0A3Q1M3U5;A0A3Q1M667;A0A3Q1MFI7;A0A3Q1M0K3;G3N148;CON__ENSEMBL:ENSBTAP00000011227;A0A3Q1ML26;G3N188;A0A3Q1MIL5;G3MY71;G3N3Q3;G3N1H5;CON__ENSEMBL:ENSBTAP00000033053;A0A3Q1MUR2	CON__Q1RMK2	Cytosolic	Cytosolic	0	CON__Q1RMK2;G5E513;A0A3Q1M032	6;5;5;2;1;1;1;1;1;1;1;1;1;1;1;1;1;1;1	6;5;5;2;1;1;1;1;1;1;1;1;1;1;1;1;1;1;1	4;3;3;0;1;1;1;1;1;1;1;1;1;1;1;1;1;1;1	;tr|G5E513|G5E513_BOVIN Uncharacterized protein OS=Bos taurus OX=9913 PE=1 SV=2;tr|A0A3Q1M032|A0A3Q1M032_BOVIN Uncharacterized protein OS=Bos taurus OX=9913 PE=1 SV=1	19	6	6	4	4	4	3	6	6	0	4	4	3	6	6	0	3	2	2	4	4	0	11.1	11.1	7.4	65.056	597	597;439;369;369;220;415;242;223;220;123;137;219;218;216;212;189;167;139;220	2.57	11	12	0	67.535	By MS/MS	By MS/MS	By MS/MS	By MS/MS	By MS/MS		9.7
CON__Q1RMN8;F1MLW7;A0A3Q1M4Z1	CON__Q1RMN8	Cytosolic	Cytosolic	0	CON__Q1RMN8;F1MLW7	9;7;2	9;7;2	2;0;0	;tr|F1MLW7|F1MLW7_BOVIN Ig-like domain-containing protein OS=Bos taurus OX=9913 PE=4 SV=3	3	9	9	2	5	6	5	8	8	4	5	6	5	8	8	4	2	2	1	2	2	1	43.2	43.2	12.8	24.536	234	234;139;264	2.35	39	32	0	323.31	By MS/MS	By MS/MS	By MS/MS	By MS/MS	By MS/MS	By MS/MS	29.5
CON__Q2KIF2;F6RMV5	CON__Q2KIF2	Cytosolic	Cytosolic	0	CON__Q2KIF2;F6RMV5	9;9	9;9	9;9	;tr|F6RMV5|F6RMV5_BOVIN Leucine rich alpha-2-glycoprotein 1 OS=Bos taurus OX=9913 GN=LRG1 PE=1 SV=1	2	9	9	9	6	6	5	9	9	2	6	6	5	9	9	2	6	6	5	9	9	2	22.8	22.8	22.8	38.348	346	346;353	2.44	25	23	0	68.146	By MS/MS	By MS/MS	By MS/MS	By MS/MS	By MS/MS	By MS/MS	17.9
CON__Q32MB2;CON__Q7RTS7;CON__Q3SY84;Q148H5;A0A452DIF0	CON__Q32MB2	Cytosolic	Cytosolic	0	CON__Q32MB2;CON__Q7RTS7	4;3;1;1;1	2;1;1;1;1	0;0;0;0;0	;	5	4	2	0	2	1	3	1	0	3	2	1	1	0	0	1	0	0	0	0	0	0	6.1	4.4	0	58.923	540	540;529;523;525;534	1.6	4	1	0	11.549	By MS/MS	By MS/MS	By MS/MS	By matching		By MS/MS	4.4
CON__Q497I4	CON__Q497I4	Cytosolic	Cytosolic	0	CON__Q497I4	8	2	2		1	8	2	2	0	0	0	2	2	8	0	0	0	0	0	2	0	0	0	0	0	2	13.8	3.1	3.1	50.529	455	455	4		2	0	37.449				By matching	By matching	By MS/MS	0
CON__Q5D862	CON__Q5D862	Cytosolic	Cytosolic	0	CON__Q5D862	1	1	1		1	1	1	1	0	0	1	0	1	1	0	0	1	0	1	1	0	0	1	0	1	1	0.5	0.5	0.5	248.07	2391	2391	3	1	2	0.0029586	6.5491			By MS/MS		By matching	By MS/MS	0
CON__Q61726	CON__Q61726	Cytosolic	Cytosolic	0	CON__Q61726	21	2	2		1	21	2	2	0	0	0	1	1	21	0	0	0	0	0	2	0	0	0	0	0	2	26.9	2.1	2.1	52.809	479	479	4		2	0	13.162				By matching	By matching	By MS/MS	0
CON__Q6IFU6	CON__Q6IFU6	Cytosolic	Cytosolic	0	CON__Q6IFU6	3	3	3		1	3	3	3	0	0	0	0	0	3	0	0	0	0	0	3	0	0	0	0	0	3	9.4	9.4	9.4	55.651	491	491	4		3	0	22.74						By MS/MS	0
CON__Q6IFZ6	CON__Q6IFZ6	Cytosolic	Cytosolic	0	CON__Q6IFZ6	6	1	0		1	6	1	0	2	2	5	1	1	6	0	0	1	0	0	1	0	0	0	0	0	0	5.9	2.1	0	61.358	572	572	2.5	1	1	0	65.405	By matching	By matching	By MS/MS	By matching	By matching	By MS/MS	3.3
CON__Q6NT21;CON__P78385	CON__Q6NT21	Cytosolic	Cytosolic	0	CON__Q6NT21;CON__P78385	35;33	2;1	2;1	;	2	35	2	2	0	0	0	1	1	35	0	0	0	0	0	2	0	0	0	0	0	2	49.5	4.3	4.3	54.195	493	493;493	4		2	0	11.991				By matching	By matching	By MS/MS	0
CON__Q86YZ3	CON__Q86YZ3	Cytosolic	Cytosolic	0	CON__Q86YZ3	4	4	4		1	4	4	4	0	0	1	0	0	3	0	0	1	0	0	3	0	0	1	0	0	3	7.9	7.9	7.9	282.39	2850	2850	3.25	1	3	0	45.023			By MS/MS			By MS/MS	0
CON__Q8IUT8;CON__O76011	CON__Q8IUT8	Cytosolic	Cytosolic	0	CON__Q8IUT8;CON__O76011	20;18	11;11	8;8	;	2	20	11	8	0	0	0	1	4	20	0	0	0	0	1	11	0	0	0	0	1	8	40.8	27.1	22.5	49.411	436	436;394	4		15	0	323.31				By matching	By matching	By MS/MS	0
CON__Q92764	CON__Q92764	Cytosolic	Cytosolic	0	CON__Q92764	10	5	3		1	10	5	3	0	0	0	2	3	10	0	0	0	1	2	5	0	0	0	0	1	3	21.6	12	6.6	47.596	425	425	4		8	0	33.941				By MS/MS	By MS/MS	By MS/MS	0
CON__Q9BYQ5	CON__Q9BYQ5	Cytosolic	Cytosolic	0	CON__Q9BYQ5	2	2	2		1	2	2	2	0	0	0	0	0	2	0	0	0	0	0	2	0	0	0	0	0	2	28.8	28.8	28.8	21.825	205	205	4		3	0	323.31						By MS/MS	0
CON__Q9BYQ8	CON__Q9BYQ8	Cytosolic	Cytosolic	0	CON__Q9BYQ8	2	2	2		1	2	2	2	0	0	0	0	0	2	0	0	0	0	0	2	0	0	0	0	0	2	30	30	30	22.406	210	210	4		5	0	136.18						By MS/MS	0
CON__Q9BYR4	CON__Q9BYR4	Cytosolic	Cytosolic	0	CON__Q9BYR4	3	3	3		1	3	3	3	0	0	0	0	0	3	0	0	0	0	0	3	0	0	0	0	0	3	30.8	30.8	30.8	20.504	195	195	4		3	0	323.01						By MS/MS	0
CON__Q9BYR8	CON__Q9BYR8	Cytosolic	Cytosolic	0	CON__Q9BYR8	2	2	2		1	2	2	2	0	0	0	0	0	2	0	0	0	0	0	2	0	0	0	0	0	2	20.4	20.4	20.4	10.539	98	98	4		2	0	27.468						By MS/MS	0
CON__Q9BYR9;A5PJJ4;Q0VC31;A5PJJ0	CON__Q9BYR9	Cytosolic	Cytosolic	0	CON__Q9BYR9;A5PJJ4;Q0VC31;A5PJJ0	2;1;1;1	2;1;1;1	2;1;1;1	;tr|A5PJJ4|A5PJJ4_BOVIN LOC787225 protein OS=Bos taurus OX=9913 GN=LOC787225 PE=2 SV=1;tr|Q0VC31|Q0VC31_BOVIN Keratin associated protein-like OS=Bos taurus OX=9913 GN=LOC777598 PE=2 SV=1;tr|A5PJJ0|A5PJJ0_BOVIN LOC618938 protein OS=Bos taurus OX=9913 GN=LOC	4	2	2	2	0	0	0	0	0	2	0	0	0	0	0	2	0	0	0	0	0	2	25.8	25.8	25.8	13.48	128	128;126;132;132	4		4	0	80.729						By MS/MS	0
CON__Q9NSB4	CON__Q9NSB4	Cytosolic	Cytosolic	0	CON__Q9NSB4	6	1	1		1	6	1	1	0	0	0	0	0	6	0	0	0	0	0	1	0	0	0	0	0	1	8.8	1.6	1.6	56.682	513	513	4		1	0.0029499	6.5378						By MS/MS	0
CON__REFSEQ:XP_001252647;A0A0A0MPA0;A0A3Q1MGZ6;A0A3Q1MGP2;CON__A2I7N3;A2I7N3;A0A0A0MP92	CON__REFSEQ:XP_001252647	Cytosolic	Cytosolic	0	CON__REFSEQ:XP_001252647;A0A0A0MPA0;A0A3Q1MGZ6	5;4;3;2;2;2;2	3;3;1;0;0;0;0	3;3;1;0;0;0;0	;tr|A0A0A0MPA0|A0A0A0MPA0_BOVIN SERPIN domain-containing protein OS=Bos taurus OX=9913 GN=LOC784932 PE=1 SV=1;tr|A0A3Q1MGZ6|A0A3Q1MGZ6_BOVIN SERPIN domain-containing protein OS=Bos taurus OX=9913 GN=LOC112445741 PE=3 SV=1	7	5	3	3	4	4	2	3	3	1	3	2	2	2	2	0	3	2	2	2	2	0	14.1	8.4	8.4	46.897	417	417;417;397;390;417;417;417	2	8	4	0	72.208	By MS/MS	By MS/MS	By MS/MS	By MS/MS	By MS/MS	By matching	10.3
CON__REFSEQ:XP_001474382	CON__REFSEQ:XP_001474382	Cytosolic	Cytosolic	0	CON__REFSEQ:XP_001474382	1	1	1		1	1	1	1	0	0	0	0	0	1	0	0	0	0	0	1	0	0	0	0	0	1	13.2	13.2	13.2	11.964	114	114	4		1	0	6.697						By MS/MS	0
G3MYZ3;CON__REFSEQ:XP_585019	G3MYZ3	AFM	Cytosolic	0	G3MYZ3;CON__REFSEQ:XP_585019	1;1	1;1	1;1	sp|G3MYZ3|AFAM_BOVIN Afamin OS=Bos taurus OX=9913 GN=AFM PE=1 SV=1;	2	1	1	1	1	1	1	1	1	0	1	1	1	1	1	0	1	1	1	1	1	0	2.5	2.5	2.5	69.561	604	604;604	2.2	3	2	0.0028902	6.5028	By MS/MS	By MS/MS	By MS/MS	By MS/MS	By MS/MS		2.5
CON__REFSEQ:XP_986630	CON__REFSEQ:XP_986630	Cytosolic	Cytosolic	0	CON__REFSEQ:XP_986630	9	3	3		1	9	3	3	0	0	0	2	2	9	0	0	0	0	0	3	0	0	0	0	0	3	14.1	4.8	4.8	53.728	476	476	4		4	0	19.89				By matching	By matching	By MS/MS	0
E1B7K5	E1B7K5	CKAP5	Cytoskeletal	0	E1B7K5	1	1	1	tr|E1B7K5|E1B7K5_BOVIN Cytoskeleton associated protein 5 OS=Bos taurus OX=9913 GN=CKAP5 PE=4 SV=2	1	1	1	1	0	0	0	1	1	0	0	0	0	1	1	0	0	0	0	1	1	0	0.9	0.9	0.9	225.12	2032	2032	4		2	0.0030488	6.6243				By MS/MS	By MS/MS		0
E1B898;A0A3Q1MKM0	E1B898	KRT86	Cytoskeletal	0	E1B898;A0A3Q1MKM0	29;28	1;1	1;1	tr|E1B898|E1B898_BOVIN Keratin 86 OS=Bos taurus OX=9913 GN=KRT86 PE=3 SV=1;tr|A0A3Q1MKM0|A0A3Q1MKM0_BOVIN Keratin 86 OS=Bos taurus OX=9913 GN=KRT86 PE=3 SV=1	2	29	1	1	0	0	0	1	1	29	0	0	0	0	0	1	0	0	0	0	0	1	40.5	1.9	1.9	53.331	486	486;476	4		1	0	36.59				By matching	By matching	By MS/MS	0
E1B8N5	E1B8N5	ATP1A4	Membrane	0	E1B8N5	1	1	1	tr|E1B8N5|E1B8N5_BOVIN Sodium/potassium-transporting ATPase subunit alpha OS=Bos taurus OX=9913 GN=ATP1A4 PE=3 SV=2	1	1	1	1	0	0	1	0	0	0	0	0	1	0	0	0	0	0	1	0	0	0	1.5	1.5	1.5	113.73	1030	1030	1	1		1	-2			By MS/MS				0
E1BF78;E1B937	E1BF78	0	Cytosolic	0	E1BF78;E1B937	1;1	1;1	1;1	tr|E1BF78|E1BF78_BOVIN D-aminoacyl-tRNA deacylase OS=Bos taurus OX=9913 PE=3 SV=2;tr|E1B937|E1B937_BOVIN D-aminoacyl-tRNA deacylase OS=Bos taurus OX=9913 GN=DTD2 PE=3 SV=1	2	1	1	1	0	1	0	1	1	0	0	1	0	1	1	0	0	1	0	1	1	0	11.3	11.3	11.3	18.548	168	168;168	3	1	2	0	7.2002		By MS/MS		By MS/MS	By matching		0
E1B9K4	E1B9K4	HMCN2	Core Matrisome	ECM Glycoproteins	E1B9K4	1	1	1	tr|E1B9K4|E1B9K4_BOVIN Uncharacterized protein OS=Bos taurus OX=9913 GN=HMCN2 PE=4 SV=3	1	1	1	1	1	1	0	0	0	0	1	1	0	0	0	0	1	1	0	0	0	0	0.2	0.2	0.2	546.65	5086	5086	1	2		0	10.816	By MS/MS	By MS/MS					0.2
E1B9P2	E1B9P2	CNR2	Membrane	0	E1B9P2	1	1	1	tr|E1B9P2|E1B9P2_BOVIN Cannabinoid receptor 2 OS=Bos taurus OX=9913 GN=CNR2 PE=3 SV=2	1	1	1	1	1	1	1	1	0	1	1	1	1	1	0	1	1	1	1	1	0	1	2.2	2.2	2.2	40.032	361	361	2.2	3	2	0.005305	6.2833	By matching	By matching	By MS/MS	By MS/MS		By MS/MS	2.2
E1B9Q8	E1B9Q8	ZNF609	Cytosolic	0	E1B9Q8	1	1	1	tr|E1B9Q8|E1B9Q8_BOVIN Zinc finger protein 609 OS=Bos taurus OX=9913 GN=ZNF609 PE=4 SV=2	1	1	1	1	0	1	0	0	0	0	0	1	0	0	0	0	0	1	0	0	0	0	1	1	1	151.04	1411	1411	1	1		0	6.783		By MS/MS					0
G3N309;E1B9R5	G3N309	DNAH8	Cytoskeletal	0	G3N309;E1B9R5	1;1	1;1	1;1	tr|G3N309|G3N309_BOVIN Dynein axonemal heavy chain 8 OS=Bos taurus OX=9913 GN=DNAH8 PE=3 SV=2;tr|E1B9R5|E1B9R5_BOVIN Dynein axonemal heavy chain 8 OS=Bos taurus OX=9913 GN=DNAH8 PE=3 SV=3	2	1	1	1	1	1	1	1	1	1	1	1	1	1	1	1	1	1	1	1	1	1	0.1	0.1	0.1	534.16	4667	4667;4730	2.5	3	3	0	8.0954	By matching	By matching	By MS/MS	By matching	By matching	By MS/MS	0.1
E1BAF6	E1BAF6	PRRC2A	Nuclear	0	E1BAF6	1	1	1	tr|E1BAF6|E1BAF6_BOVIN Proline rich coiled-coil 2A OS=Bos taurus OX=9913 GN=PRRC2A PE=4 SV=3	1	1	1	1	1	0	1	0	0	0	1	0	1	0	0	0	1	0	1	0	0	0	0.7	0.7	0.7	229.62	2166	2166	1	2		0.0051414	6.2056	By MS/MS		By MS/MS				0.7
E1BAP3	E1BAP3	SP110	Nuclear	0	E1BAP3	1	1	1	tr|E1BAP3|E1BAP3_BOVIN Uncharacterized protein OS=Bos taurus OX=9913 GN=SP110 PE=4 SV=2	1	1	1	1	0	0	1	1	1	0	0	0	1	1	1	0	0	0	1	1	1	0	1.2	1.2	1.2	83.464	737	737	3	1	2	0.0097561	6.1198			By MS/MS	By MS/MS	By MS/MS		0
E1BAU7	E1BAU7	SERPINB7	Matrisome Associated	ECM Regulators	E1BAU7	1	1	1	tr|E1BAU7|E1BAU7_BOVIN Serpin family B member 7 OS=Bos taurus OX=9913 GN=SERPINB7 PE=3 SV=1	1	1	1	1	1	0	1	1	0	1	1	0	1	1	0	1	1	0	1	1	0	1	2.6	2.6	2.6	43.101	381	381	2.5	2	2	0.0053333	6.2861	By MS/MS		By MS/MS	By MS/MS		By MS/MS	2.6
E1BB91	E1BB91	COL6A3	Core Matrisome	Collagens	E1BB91	55	55	55	tr|E1BB91|E1BB91_BOVIN Collagen type VI alpha 3 chain OS=Bos taurus OX=9913 GN=COL6A3 PE=1 SV=2	1	55	55	55	43	44	26	21	22	4	43	44	26	21	22	4	43	44	26	21	22	4	21	21	21	339.58	3132	3132	1.85	128	51	0	323.31	By MS/MS	By MS/MS	By MS/MS	By MS/MS	By MS/MS	By MS/MS	16.5
E1BBQ0	E1BBQ0	KNTC1	Cytoskeletal	0	E1BBQ0	1	1	1	tr|E1BBQ0|E1BBQ0_BOVIN Kinetochore associated 1 OS=Bos taurus OX=9913 GN=KNTC1 PE=4 SV=3	1	1	1	1	0	0	1	0	0	0	0	0	1	0	0	0	0	0	1	0	0	0	0.6	0.6	0.6	250.67	2204	2204	1	1		1	-2			By MS/MS				0
G3MZW6;E1BBR6	G3MZW6	FYCO1	Cytosolic	0	G3MZW6;E1BBR6	1;1	1;1	1;1	tr|G3MZW6|G3MZW6_BOVIN FYVE and coiled-coil domain autophagy adaptor 1 OS=Bos taurus OX=9913 GN=FYCO1 PE=4 SV=2;tr|E1BBR6|E1BBR6_BOVIN FYVE and coiled-coil domain autophagy adaptor 1 OS=Bos taurus OX=9913 GN=FYCO1 PE=4 SV=2	2	1	1	1	1	0	0	0	0	0	1	0	0	0	0	0	1	0	0	0	0	0	0.8	0.8	0.8	163.27	1445	1445;1454	1	1		0	11.637	By MS/MS						0.8
E1BCA5	E1BCA5	SERPINI1	Matrisome Associated	ECM Regulators	E1BCA5	1	1	1	tr|E1BCA5|E1BCA5_BOVIN Serpin family I member 1 OS=Bos taurus OX=9913 GN=SERPINI1 PE=3 SV=2	1	1	1	1	1	1	1	1	1	0	1	1	1	1	1	0	1	1	1	1	1	0	3.2	3.2	3.2	46.342	410	410	2.2	3	2	0	6.8781	By MS/MS	By MS/MS	By MS/MS	By matching	By MS/MS		3.2
E1BFP1	E1BFP1	HEBP2	Cytosolic	0	E1BFP1	3	3	3	tr|E1BFP1|E1BFP1_BOVIN Heme binding protein 2 OS=Bos taurus OX=9913 GN=HEBP2 PE=1 SV=1	1	3	3	3	3	3	3	3	3	0	3	3	3	3	3	0	3	3	3	3	3	0	15.6	15.6	15.6	23.028	205	205	2.2	9	6	0	30.658	By MS/MS	By MS/MS	By MS/MS	By MS/MS	By MS/MS		15.6
E1BFX4;A6QPY4;A0A3Q1LQX3;A0A3Q1LV30	E1BFX4	SGSH	Cytosolic	0	E1BFX4;A6QPY4	5;3;2;2	5;3;2;2	5;3;2;2	tr|E1BFX4|E1BFX4_BOVIN N-sulfoglucosamine sulfohydrolase OS=Bos taurus OX=9913 GN=SGSH PE=3 SV=1;tr|A6QPY4|A6QPY4_BOVIN N-sulfoglucosamine sulfohydrolase OS=Bos taurus OX=9913 GN=SGSH PE=2 SV=1	4	5	5	5	3	3	3	5	5	0	3	3	3	5	5	0	3	3	3	5	5	0	11.7	11.7	11.7	57.249	505	505;306;281;375	2.58	9	10	0	34.827	By MS/MS	By MS/MS	By MS/MS	By MS/MS	By MS/MS		8.1
E1BG25	E1BG25	MELTF	Membrane	0	E1BG25	3	3	3	tr|E1BG25|E1BG25_BOVIN Melanotransferrin OS=Bos taurus OX=9913 GN=MELTF PE=3 SV=1	1	3	3	3	2	3	3	1	1	0	2	3	3	1	1	0	2	3	3	1	1	0	4.5	4.5	4.5	80.693	739	739	1.6	8	2	0	62.967	By MS/MS	By MS/MS	By MS/MS	By MS/MS	By MS/MS		3
G5E6T0;G3MXU2;E1BH93	G5E6T0	MAST4	Cytosolic	0	G5E6T0;G3MXU2;E1BH93	1;1;1	1;1;1	1;1;1	tr|G5E6T0|G5E6T0_BOVIN Non-specific serine/threonine protein kinase OS=Bos taurus OX=9913 GN=MAST4 PE=3 SV=2;tr|G3MXU2|G3MXU2_BOVIN Non-specific serine/threonine protein kinase OS=Bos taurus OX=9913 GN=MAST4 PE=3 SV=2;tr|E1BH93|E1BH93_BOVIN Non-specific se	3	1	1	1	1	1	0	0	0	0	1	1	0	0	0	0	1	1	0	0	0	0	0.3	0.3	0.3	343.25	3126	3126;3126;3144	1	2		1	-2	By MS/MS	By matching					0.3
E1BI28	E1BI28	GM2A	Cytosolic	0	E1BI28	1	1	1	tr|E1BI28|E1BI28_BOVIN GM2 ganglioside activator OS=Bos taurus OX=9913 GN=GM2A PE=4 SV=2	1	1	1	1	0	0	1	0	0	0	0	0	1	0	0	0	0	0	1	0	0	0	5.2	5.2	5.2	20.888	193	193	1	1		0.0052083	6.2396			By MS/MS				0
E1BI98	E1BI98	COL6A1	Core Matrisome	Collagens	E1BI98	5	5	5	tr|E1BI98|E1BI98_BOVIN Collagen type VI alpha 1 chain OS=Bos taurus OX=9913 GN=COL6A1 PE=1 SV=1	1	5	5	5	3	5	1	2	2	0	3	5	1	2	2	0	3	5	1	2	2	0	6.9	6.9	6.9	108.67	1027	1027	1.92	9	4	0	40.239	By MS/MS	By MS/MS	By MS/MS	By MS/MS	By MS/MS		3.7
E1BIP9	E1BIP9	ZCCHC24	Cytosolic	0	E1BIP9	1	1	1	tr|E1BIP9|E1BIP9_BOVIN Zinc finger CCHC-type containing 24 OS=Bos taurus OX=9913 GN=ZCCHC24 PE=4 SV=3	1	1	1	1	0	1	0	0	0	0	0	1	0	0	0	0	0	1	0	0	0	0	4.1	4.1	4.1	26.983	241	241	1	1		1	-2		By MS/MS					0
E1BK29	E1BK29	COG1	Membrane	0	E1BK29	1	1	1	tr|E1BK29|E1BK29_BOVIN Conserved oligomeric Golgi complex subunit 1 OS=Bos taurus OX=9913 GN=COG1 PE=3 SV=3	1	1	1	1	0	0	0	0	0	1	0	0	0	0	0	1	0	0	0	0	0	1	1.1	1.1	1.1	108.55	981	981	4		1	0.0054348	6.3217						By MS/MS	0
E1BKR1	E1BKR1	SLC22A14	Cytosolic	0	E1BKR1	1	1	1	tr|E1BKR1|E1BKR1_BOVIN Solute carrier family 22 member 14 OS=Bos taurus OX=9913 GN=SLC22A14 PE=4 SV=3	1	1	1	1	0	0	0	1	1	0	0	0	0	1	1	0	0	0	0	1	1	0	2.1	2.1	2.1	64.4	576	576	4		2	1	-2				By MS/MS	By MS/MS		0
E1BKT9;A0A3Q1MR22	E1BKT9	DSP	Cytoskeletal	0	E1BKT9;A0A3Q1MR22	6;4	6;4	6;4	tr|E1BKT9|E1BKT9_BOVIN Desmoplakin OS=Bos taurus OX=9913 GN=DSP PE=1 SV=2;tr|A0A3Q1MR22|A0A3Q1MR22_BOVIN Desmoplakin OS=Bos taurus OX=9913 GN=DSP PE=1 SV=1	2	6	6	6	0	1	2	0	0	5	0	1	2	0	0	5	0	1	2	0	0	5	2.5	2.5	2.5	332.4	2889	2889;2124	2.67	4	5	0	36.914		By matching	By MS/MS			By MS/MS	0
G3X6J9;E1BLC3;A0A3Q1LRT2;A0A3Q1LKG7	G3X6J9	ANKRD26	Cytoskeletal	0	G3X6J9;E1BLC3;A0A3Q1LRT2;A0A3Q1LKG7	2;2;1;1	2;2;1;1	2;2;1;1	tr|G3X6J9|G3X6J9_BOVIN ANK_REP_REGION domain-containing protein OS=Bos taurus OX=9913 GN=ANKRD26 PE=4 SV=2;tr|E1BLC3|E1BLC3_BOVIN ANK_REP_REGION domain-containing protein OS=Bos taurus OX=9913 GN=ANKRD26 PE=4 SV=3;tr|A0A3Q1LRT2|A0A3Q1LRT2_BOVIN CCDC144C do	4	2	2	2	1	0	1	0	0	1	1	0	1	0	0	1	1	0	1	0	0	1	1.4	1.4	1.4	185.13	1621	1621;1698;326;326	2	2	1	0	11.625	By MS/MS		By MS/MS			By MS/MS	0.7
E1BLR9	E1BLR9	CPD	Nuclear	0	E1BLR9	4	4	4	tr|E1BLR9|E1BLR9_BOVIN Carboxypeptidase D OS=Bos taurus OX=9913 GN=CPD PE=3 SV=3	1	4	4	4	4	3	4	3	3	0	4	3	4	3	3	0	4	3	4	3	3	0	4.4	4.4	4.4	152.58	1377	1377	2.06	11	6	0	31.981	By MS/MS	By MS/MS	By MS/MS	By MS/MS	By MS/MS		4.4
E1BLS3	E1BLS3	SEC31B	Membrane	0	E1BLS3	1	1	1	tr|E1BLS3|E1BLS3_BOVIN SEC31 homolog B, COPII coat complex component OS=Bos taurus OX=9913 GN=SEC31B PE=3 SV=2	1	1	1	1	0	0	0	1	1	0	0	0	0	1	1	0	0	0	0	1	1	0	1.1	1.1	1.1	128.72	1177	1177	4		2	0.0050891	6.1734				By MS/MS	By MS/MS		0
E1BMH7	E1BMH7	CCDC198	Cytosolic	0	E1BMH7	1	1	1	tr|E1BMH7|E1BMH7_BOVIN Coiled-coil domain containing 198 OS=Bos taurus OX=9913 GN=CCDC198 PE=4 SV=3	1	1	1	1	0	0	0	0	0	1	0	0	0	0	0	1	0	0	0	0	0	1	3.2	3.2	3.2	33.123	280	280	4		1	1	-2						By MS/MS	0
E1BMK7	E1BMK7	LOC107131333	Cytosolic	0	E1BMK7	1	1	1	tr|E1BMK7|E1BMK7_BOVIN GB1/RHD3-type G domain-containing protein OS=Bos taurus OX=9913 GN=LOC107131333 PE=3 SV=3	1	1	1	1	1	1	1	1	1	1	1	1	1	1	1	1	1	1	1	1	1	1	1.1	1.1	1.1	72.652	638	638	2.5	3	3	0	6.9739	By MS/MS	By matching	By matching	By matching	By MS/MS	By matching	1.1
E1BN25	E1BN25	BAZ1A	Nuclear	0	E1BN25	1	1	1	tr|E1BN25|E1BN25_BOVIN Bromodomain adjacent to zinc finger domain 1A OS=Bos taurus OX=9913 GN=BAZ1A PE=4 SV=3	1	1	1	1	1	0	0	0	0	0	1	0	0	0	0	0	1	0	0	0	0	0	0.6	0.6	0.6	178.67	1557	1557	1	1		0	6.8618	By MS/MS						0.6
E1BNA9	E1BNA9	ZZEF1	Cytosolic	0	E1BNA9	1	1	1	tr|E1BNA9|E1BNA9_BOVIN Zinc finger ZZ-type and EF-hand domain containing 1 OS=Bos taurus OX=9913 GN=ZZEF1 PE=4 SV=3	1	1	1	1	0	0	1	0	0	1	0	0	1	0	0	1	0	0	1	0	0	1	0.5	0.5	0.5	331.1	2962	2962	2.5	1	1	0	7.3335			By MS/MS			By MS/MS	0
E1BNE9	E1BNE9	KCNJ3 GIRK1	Cytosolic	0	E1BNE9	1	1	1	sp|E1BNE9|KCNJ3_BOVIN G protein-activated inward rectifier potassium channel 1 OS=Bos taurus OX=9913 GN=KCNJ3 PE=1 SV=1	1	1	1	1	0	0	1	0	0	0	0	0	1	0	0	0	0	0	1	0	0	0	1.6	1.6	1.6	56.547	501	501	1	1		1	-2			By MS/MS				0
E1BPP2	E1BPP2	BMS1	Nuclear	0	E1BPP2	1	1	1	tr|E1BPP2|E1BPP2_BOVIN BMS1 ribosome biogenesis factor OS=Bos taurus OX=9913 GN=BMS1 PE=4 SV=2	1	1	1	1	1	1	1	1	1	1	1	1	1	1	1	1	1	1	1	1	1	1	0.5	0.5	0.5	146.45	1284	1284	2.5	3	3	0	11.107	By MS/MS	By matching	By matching	By matching	By MS/MS	By matching	0.5
Q2TA14;F1MAU4	Q2TA14	PRCP	Cytosolic	0	Q2TA14;F1MAU4	4;4	4;4	4;4	sp|Q2TA14|PCP_BOVIN Lysosomal Pro-X carboxypeptidase OS=Bos taurus OX=9913 GN=PRCP PE=2 SV=1;tr|F1MAU4|F1MAU4_BOVIN Lysosomal Pro-X carboxypeptidase OS=Bos taurus OX=9913 GN=PRCP PE=3 SV=1	2	4	4	4	2	4	3	0	0	0	2	4	3	0	0	0	2	4	3	0	0	0	9.4	9.4	9.4	56.67	499	499;499	1	10		0	30.578	By MS/MS	By MS/MS	By MS/MS				4.2
F1MBM1	F1MBM1	HEATR4	Cytosolic	0	F1MBM1	1	1	1	tr|F1MBM1|F1MBM1_BOVIN HEAT repeat containing 4 OS=Bos taurus OX=9913 GN=HEATR4 PE=4 SV=3	1	1	1	1	0	0	1	0	0	0	0	0	1	0	0	0	0	0	1	0	0	0	1.4	1.4	1.4	116.52	1030	1030	1	1		1	-2			By MS/MS				0
F1MC11;A0A3Q1M2I5;CON__Q9Z2K1;CON__Q3ZAW8;P05785;CON__Q61782	F1MC11	KRT14	Cytoskeletal	0	F1MC11;A0A3Q1M2I5	14;13;5;5;4;4	1;1;0;0;0;0	1;1;0;0;0;0	tr|F1MC11|F1MC11_BOVIN Keratin, type I cytoskeletal 14 OS=Bos taurus OX=9913 GN=KRT14 PE=1 SV=3;tr|A0A3Q1M2I5|A0A3Q1M2I5_BOVIN Keratin, type I cytoskeletal 14 OS=Bos taurus OX=9913 GN=KRT14 PE=1 SV=1	6	14	1	1	1	0	8	4	3	12	0	0	0	0	0	1	0	0	0	0	0	1	23.5	1.9	1.9	55.895	515	515;458;469;474;93;93	4		1	0.005291	6.2777	By matching		By matching	By matching	By matching	By MS/MS	1.7
P10064;F1MCS2	P10064	GABRA3	Membrane	0	P10064;F1MCS2	1;1	1;1	1;1	sp|P10064|GBRA3_BOVIN Gamma-aminobutyric acid receptor subunit alpha-3 OS=Bos taurus OX=9913 GN=GABRA3 PE=2 SV=1;tr|F1MCS2|F1MCS2_BOVIN Gamma-aminobutyric acid receptor subunit alpha-3 OS=Bos taurus OX=9913 GN=GABRA3 PE=3 SV=1	2	1	1	1	0	1	0	0	0	0	0	1	0	0	0	0	0	1	0	0	0	0	1.8	1.8	1.8	55.283	492	492;492	1	1		1	-2		By MS/MS					0
F1MD25	F1MD25	KIAA1549L	Cytosolic	0	F1MD25	1	1	1	tr|F1MD25|F1MD25_BOVIN KIAA1549 like OS=Bos taurus OX=9913 GN=KIAA1549L PE=4 SV=3	1	1	1	1	0	0	1	0	0	0	0	0	1	0	0	0	0	0	1	0	0	0	0.6	0.6	0.6	152.89	1412	1412	1	1		1	-2			By MS/MS				0
F1MDR7	F1MDR7	DNAJC13	Cytosolic	0	F1MDR7	1	1	1	tr|F1MDR7|F1MDR7_BOVIN DnaJ heat shock protein family (Hsp40) member C13 OS=Bos taurus OX=9913 GN=DNAJC13 PE=4 SV=3	1	1	1	1	1	0	1	0	0	0	1	0	1	0	0	0	1	0	1	0	0	0	0.5	0.5	0.5	254.41	2243	2243	1	2		1	-2	By matching		By MS/MS				0.5
F1ME65	F1ME65	CKAP4	Cytoskeletal	0	F1ME65	5	5	5	tr|F1ME65|F1ME65_BOVIN Cytoskeleton associated protein 4 OS=Bos taurus OX=9913 GN=CKAP4 PE=1 SV=1	1	5	5	5	5	5	2	3	3	0	5	5	2	3	3	0	5	5	2	3	3	0	9.8	9.8	9.8	64.529	589	589	1.9	14	6	0	45.268	By MS/MS	By MS/MS	By MS/MS	By MS/MS	By MS/MS		9.8
Q3SZV3;F1MG05	Q3SZV3	EEF1G	Nuclear	0	Q3SZV3;F1MG05	3;3	3;3	3;3	sp|Q3SZV3|EF1G_BOVIN Elongation factor 1-gamma OS=Bos taurus OX=9913 GN=EEF1G PE=2 SV=1;tr|F1MG05|F1MG05_BOVIN Elongation factor 1-gamma OS=Bos taurus OX=9913 GN=EEF1G PE=4 SV=1	2	3	3	3	2	3	3	1	1	1	2	3	3	1	1	1	2	3	3	1	1	1	5.5	5.5	5.5	50.377	440	440;440	1.82	8	3	0	26.224	By MS/MS	By MS/MS	By MS/MS	By MS/MS	By MS/MS	By matching	3.2
F1MG07;Q3ZC50	F1MG07	CCDC47	Membrane	0	F1MG07;Q3ZC50	1;1	1;1	1;1	tr|F1MG07|F1MG07_BOVIN Coiled-coil domain-containing protein 47 OS=Bos taurus OX=9913 GN=CCDC47 PE=4 SV=3;sp|Q3ZC50|CCD47_BOVIN Coiled-coil domain-containing protein 47 OS=Bos taurus OX=9913 GN=CCDC47 PE=2 SV=1	2	1	1	1	1	1	0	0	0	0	1	1	0	0	0	0	1	1	0	0	0	0	1.7	1.7	1.7	54.279	469	469;483	1	2		1	-2	By MS/MS	By MS/MS					1.7
Q29RT4;F1MG31	Q29RT4	CDCA2	Nuclear	0	Q29RT4;F1MG31	1;1	1;1	1;1	sp|Q29RT4|CDCA2_BOVIN Cell division cycle-associated protein 2 OS=Bos taurus OX=9913 GN=CDCA2 PE=2 SV=1;tr|F1MG31|F1MG31_BOVIN Cell division cycle-associated protein 2 OS=Bos taurus OX=9913 GN=CDCA2 PE=4 SV=3	2	1	1	1	1	1	0	1	1	0	1	1	0	1	1	0	1	1	0	1	1	0	0.8	0.8	0.8	111	1011	1011;1011	3.14	2	5	1	-2	By MS/MS	By matching		By MS/MS	By MS/MS		0.8
F1MG90	F1MG90	WDFY4	Cytosolic	0	F1MG90	1	1	1	tr|F1MG90|F1MG90_BOVIN WDFY family member 4 OS=Bos taurus OX=9913 GN=WDFY4 PE=4 SV=3	1	1	1	1	0	0	0	0	0	1	0	0	0	0	0	1	0	0	0	0	0	1	0.4	0.4	0.4	353.84	3188	3188	4		1	1	-2						By MS/MS	0
F1MGY9	F1MGY9	AGA	Cytosolic	0	F1MGY9	9	9	9	tr|F1MGY9|F1MGY9_BOVIN Aspartylglucosaminidase OS=Bos taurus OX=9913 GN=AGA PE=3 SV=2	1	9	9	9	9	9	8	6	6	1	9	9	8	6	6	1	9	9	8	6	6	1	32.7	32.7	32.7	36.965	346	346	2.02	43	22	0	323.31	By MS/MS	By MS/MS	By MS/MS	By MS/MS	By MS/MS	By MS/MS	32.7
F1MH40;F1MZ96;CON__Q05B55	F1MH40	0	Cytosolic	0	F1MH40;F1MZ96;CON__Q05B55	7;6;6	7;6;6	7;6;6	tr|F1MH40|F1MH40_BOVIN Uncharacterized protein OS=Bos taurus OX=9913 PE=1 SV=2;tr|F1MZ96|F1MZ96_BOVIN Uncharacterized protein OS=Bos taurus OX=9913 PE=1 SV=3;	3	7	7	7	5	4	4	5	5	2	5	4	4	5	5	2	5	4	4	5	5	2	27.9	27.9	27.9	26.334	240	240;240;240	2.68	15	19	0	323.31	By MS/MS	By MS/MS	By MS/MS	By MS/MS	By MS/MS	By MS/MS	17.9
P48035;F1MHQ4	P48035	FABP4	Nuclear	0	P48035;F1MHQ4	3;3	3;3	3;3	sp|P48035|FABP4_BOVIN Fatty acid-binding protein, adipocyte OS=Bos taurus OX=9913 GN=FABP4 PE=2 SV=2;tr|F1MHQ4|F1MHQ4_BOVIN Adipocyte-type fatty acid-binding protein OS=Bos taurus OX=9913 GN=FABP4 PE=3 SV=2	2	3	3	3	3	3	2	2	2	0	3	3	2	2	2	0	3	3	2	2	2	0	25	25	25	14.678	132	132;132	1.75	12	4	0	32.94	By MS/MS	By MS/MS	By MS/MS	By MS/MS	By MS/MS		25
F1MHZ3	F1MHZ3	NPAT	Nuclear	0	F1MHZ3	1	1	1	tr|F1MHZ3|F1MHZ3_BOVIN Nuclear protein, coactivator of histone transcription OS=Bos taurus OX=9913 GN=NPAT PE=4 SV=2	1	1	1	1	1	1	1	0	0	0	1	1	1	0	0	0	1	1	1	0	0	0	1	1	1	155.66	1433	1433	1	4		0.0053763	6.3095	By MS/MS	By MS/MS	By MS/MS				1
Q03763;F1MIW8	Q03763	DSG1	Cytosolic	0	Q03763;F1MIW8	1;1	1;1	1;1	sp|Q03763|DSG1_BOVIN Desmoglein-1 OS=Bos taurus OX=9913 GN=DSG1 PE=1 SV=1;tr|F1MIW8|F1MIW8_BOVIN Desmoglein-1 OS=Bos taurus OX=9913 GN=DSG1 PE=4 SV=2	2	1	1	1	0	0	0	0	0	1	0	0	0	0	0	1	0	0	0	0	0	1	1.3	1.3	1.3	112.24	1043	1043;1043	4		1	0	8.5856						By MS/MS	0
F1MJH0	F1MJH0	SPINK5	Cytosolic	0	F1MJH0	1	1	1	tr|F1MJH0|F1MJH0_BOVIN Serine peptidase inhibitor Kazal type 5 OS=Bos taurus OX=9913 GN=SPINK5 PE=4 SV=3	1	1	1	1	0	0	1	0	0	0	0	0	1	0	0	0	0	0	1	0	0	0	0.9	0.9	0.9	129.13	1135	1135	1	1		1	-2			By MS/MS				0
F1MKG2	F1MKG2	COL6A2	Core Matrisome	Collagens	F1MKG2	8	8	3	tr|F1MKG2|F1MKG2_BOVIN Collagen type VI alpha 2 chain OS=Bos taurus OX=9913 GN=COL6A2 PE=1 SV=3	1	8	8	3	7	7	3	0	0	0	7	7	3	0	0	0	3	3	3	0	0	0	9.3	9.3	4.4	105.18	979	979	1	17		0	58.847	By MS/MS	By MS/MS	By MS/MS				8.6
F1MLB8;P19483;A0A3Q1LZQ9	F1MLB8	ATP5F1A	Cytosolic	0	F1MLB8;P19483;A0A3Q1LZQ9	4;4;2	4;4;2	4;4;2	tr|F1MLB8|F1MLB8_BOVIN ATP synthase subunit alpha OS=Bos taurus OX=9913 GN=ATP5F1A PE=1 SV=1;sp|P19483|ATPA_BOVIN ATP synthase subunit alpha, mitochondrial OS=Bos taurus OX=9913 GN=ATP5F1A PE=1 SV=1;tr|A0A3Q1LZQ9|A0A3Q1LZQ9_BOVIN Uncharacterized protein OS	3	4	4	4	2	3	2	0	0	0	2	3	2	0	0	0	2	3	2	0	0	0	9.8	9.8	9.8	59.689	553	553;553;90	1	7		0	28.317	By MS/MS	By MS/MS	By MS/MS				4.7
F1MLW8;A0A3Q1LT19	F1MLW8	LOC100847119	Cytosolic	0	F1MLW8;A0A3Q1LT19	7;5	3;2	3;2	tr|F1MLW8|F1MLW8_BOVIN Uncharacterized protein OS=Bos taurus OX=9913 GN=LOC100847119 PE=1 SV=2;tr|A0A3Q1LT19|A0A3Q1LT19_BOVIN Ig-like domain-containing protein OS=Bos taurus OX=9913 PE=4 SV=1	2	7	3	3	6	5	5	6	6	2	3	3	3	3	3	0	3	3	3	3	3	0	33.5	14.2	14.2	24.623	233	233;130	2.12	10	6	0	21.995	By MS/MS	By MS/MS	By MS/MS	By MS/MS	By MS/MS	By matching	32.6
F1MMN3	F1MMN3	NDST4	Membrane	0	F1MMN3	1	1	1	tr|F1MMN3|F1MMN3_BOVIN [Heparan sulfate]-glucosamine N-sulfotransferase OS=Bos taurus OX=9913 GN=NDST4 PE=3 SV=2	1	1	1	1	1	1	1	0	0	0	1	1	1	0	0	0	1	1	1	0	0	0	1	1	1	100.58	872	872	1	3		1	-2	By MS/MS	By MS/MS	By MS/MS				1
F1MMQ1	F1MMQ1	SFMBT1	Nuclear	0	F1MMQ1	1	1	1	tr|F1MMQ1|F1MMQ1_BOVIN Scm like with four mbt domains 1 OS=Bos taurus OX=9913 GN=SFMBT1 PE=4 SV=3	1	1	1	1	1	1	1	1	1	0	1	1	1	1	1	0	1	1	1	1	1	0	1.8	1.8	1.8	97.805	865	865	2.2	6	4	0	7.942	By MS/MS	By MS/MS	By MS/MS	By MS/MS	By MS/MS		1.8
F1MQ37;A0A3Q1LWN6;A0A3Q1MG42;F1MYM9;A6QLN6;F1MM57	F1MQ37	MYH9	Cytoskeletal	0	F1MQ37	8;1;1;1;1;1	8;1;1;1;1;1	7;0;0;0;0;1	tr|F1MQ37|F1MQ37_BOVIN Myosin heavy chain 9 OS=Bos taurus OX=9913 GN=MYH9 PE=1 SV=3	6	8	8	7	5	6	3	6	6	0	5	6	3	6	6	0	5	5	3	5	5	0	5.8	5.8	4.9	227.2	1965	1965;1927;1938;1949;1972;2032	2.38	14	12	0	107	By MS/MS	By MS/MS	By MS/MS	By MS/MS	By MS/MS		4.3
F1MQ87	F1MQ87	DENND5B	Membrane	0	F1MQ87	1	1	1	tr|F1MQ87|F1MQ87_BOVIN DENN domain containing 5B OS=Bos taurus OX=9913 GN=DENND5B PE=3 SV=3	1	1	1	1	0	1	0	0	0	0	0	1	0	0	0	0	0	1	0	0	0	0	0.5	0.5	0.5	145.02	1274	1274	1	1		1	-2		By MS/MS					0
Q28125;F1MQF0	Q28125	ICAM3	Cytosolic	0	Q28125;F1MQF0	1;1	1;1	1;1	sp|Q28125|ICAM3_BOVIN Intercellular adhesion molecule 3 OS=Bos taurus OX=9913 GN=ICAM3 PE=2 SV=1;tr|F1MQF0|F1MQF0_BOVIN Intercellular adhesion molecule 3 OS=Bos taurus OX=9913 GN=ICAM3 PE=3 SV=1	2	1	1	1	0	1	0	0	0	0	0	1	0	0	0	0	0	1	0	0	0	0	2.8	2.8	2.8	59.734	544	544;544	1	1		0.009828	6.1297		By MS/MS					0
Q32S24;F1MRP6	Q32S24	COL11A2	Core Matrisome	Collagens	Q32S24;F1MRP6	3;3	2;2	2;2	sp|Q32S24|COBA2_BOVIN Collagen alpha-2(XI) chain OS=Bos taurus OX=9913 GN=COL11A2 PE=3 SV=1;tr|F1MRP6|F1MRP6_BOVIN Collagen alpha-2(XI) chain OS=Bos taurus OX=9913 GN=COL11A2 PE=4 SV=2	2	3	2	2	2	2	2	2	2	0	1	1	1	1	1	0	1	1	1	1	1	0	3.3	2.6	2.6	172.24	1736	1736;1736	2	4	2	0	34.737	By matching	By MS/MS	By MS/MS	By MS/MS	By MS/MS		1.8
F1MRW5	F1MRW5	CDC20	Cytoskeletal	0	F1MRW5	1	1	1	tr|F1MRW5|F1MRW5_BOVIN Cell division cycle 20 OS=Bos taurus OX=9913 GN=CDC20 PE=3 SV=2	1	1	1	1	0	0	1	0	0	0	0	0	1	0	0	0	0	0	1	0	0	0	2.6	2.6	2.6	54.856	499	499	1	1		0.0050761	6.1728			By MS/MS				0
P45478;F1MSA1	P45478	PPT1 CLN1 PPT	Cytosolic	0	P45478;F1MSA1	1;1	1;1	1;1	sp|P45478|PPT1_BOVIN Palmitoyl-protein thioesterase 1 OS=Bos taurus OX=9913 GN=PPT1 PE=1 SV=1;tr|F1MSA1|F1MSA1_BOVIN Palmitoyl-protein hydrolase 1 OS=Bos taurus OX=9913 GN=PPT1 PE=3 SV=3	2	1	1	1	1	1	0	0	0	0	1	1	0	0	0	0	1	1	0	0	0	0	4.9	4.9	4.9	34.142	306	306;336	1	2		0	6.6853	By MS/MS	By MS/MS					4.9
F1MT15	F1MT15	PMFBP1	Cytosolic	0	F1MT15	1	1	1	tr|F1MT15|F1MT15_BOVIN Polyamine modulated factor 1 binding protein 1 OS=Bos taurus OX=9913 GN=PMFBP1 PE=4 SV=3	1	1	1	1	0	0	0	1	1	1	0	0	0	1	1	1	0	0	0	1	1	1	0.9	0.9	0.9	116.72	997	997	4		3	1	-2				By matching	By matching	By MS/MS	0
F1MTG3	F1MTG3	FAM21A	Cytosolic	0	F1MTG3	1	1	1	tr|F1MTG3|F1MTG3_BOVIN CAP-ZIP_m domain-containing protein OS=Bos taurus OX=9913 GN=FAM21A PE=4 SV=2	1	1	1	1	0	0	0	1	1	1	0	0	0	1	1	1	0	0	0	1	1	1	0.7	0.7	0.7	145.63	1333	1333	4		3	1	-2				By MS/MS	By MS/MS	By MS/MS	0
F1MTV1;F1MZM9	F1MTV1	SPAM1	Matrisome Associated	ECM Regulators	F1MTV1	13;1	13;1	13;1	tr|F1MTV1|F1MTV1_BOVIN Hyaluronidase OS=Bos taurus OX=9913 GN=SPAM1 PE=3 SV=1	2	13	13	13	12	11	9	11	11	4	12	11	9	11	11	4	12	11	9	11	11	4	22.1	22.1	22.1	62.28	553	553;552	2.13	43	26	0	199.93	By MS/MS	By MS/MS	By MS/MS	By MS/MS	By MS/MS	By MS/MS	20.6
F1MUX5	F1MUX5	LOC100295687	Cytosolic	0	F1MUX5	6	1	1	tr|F1MUX5|F1MUX5_BOVIN Glutathione transferase OS=Bos taurus OX=9913 GN=LOC100295687 PE=3 SV=3	1	6	1	1	5	3	4	4	4	2	1	0	1	1	1	1	1	0	1	1	1	1	28.9	5.5	5.5	25.596	218	218	2.8	2	3	0.0029851	6.5657	By MS/MS	By matching	By MS/MS	By MS/MS	By MS/MS	By MS/MS	25.7
F1MV07	F1MV07	SEC24D	Membrane	0	F1MV07	1	1	1	tr|F1MV07|F1MV07_BOVIN SEC24 homolog D, COPII coat complex component OS=Bos taurus OX=9913 GN=SEC24D PE=3 SV=2	1	1	1	1	0	0	1	0	0	1	0	0	1	0	0	1	0	0	1	0	0	1	1	1	1	112.46	1032	1032	3	1	2	0.0054201	6.3213			By MS/MS			By MS/MS	0
F1MW05	F1MW05	LOC112449027	Cytosolic	0	F1MW05	1	1	1	tr|F1MW05|F1MW05_BOVIN Guanylate cyclase OS=Bos taurus OX=9913 GN=LOC112449027 PE=3 SV=3	1	1	1	1	1	1	1	1	1	0	1	1	1	1	1	0	1	1	1	1	1	0	1.8	1.8	1.8	83.836	741	741	2.2	6	4	0	8.3105	By MS/MS	By MS/MS	By MS/MS	By MS/MS	By MS/MS		1.8
F1MWU9	F1MWU9	HSPA6	Cytosolic	0	F1MWU9	4	1	1	tr|F1MWU9|F1MWU9_BOVIN Heat shock protein family A (Hsp70) member 6 OS=Bos taurus OX=9913 GN=HSPA6 PE=1 SV=3	1	4	1	1	2	2	3	3	3	1	0	0	1	1	1	1	0	0	1	1	1	1	7.7	1.7	1.7	70.57	639	639	3.25	1	3	0.0030211	6.5709	By matching	By matching	By MS/MS	By MS/MS	By MS/MS	By MS/MS	4.9
F1MXG6;Q148I8	F1MXG6	KRT31	Cytoskeletal	0	F1MXG6;Q148I8	16;16	5;5	1;1	tr|F1MXG6|F1MXG6_BOVIN Keratin 31 OS=Bos taurus OX=9913 GN=KRT31 PE=3 SV=2;tr|Q148I8|Q148I8_BOVIN Keratin 31 OS=Bos taurus OX=9913 GN=KRT31 PE=2 SV=1	2	16	5	1	0	0	0	2	2	16	0	0	0	0	0	5	0	0	0	0	0	1	33.5	9.2	2.9	43.479	379	379;416	4		11	0	50.957				By matching	By matching	By MS/MS	0
F1MXX6;Q95114;G3MYW7	F1MXX6	MFGE8	Core Matrisome	ECM Glycoproteins	F1MXX6;Q95114;G3MYW7	6;6;4	6;6;4	6;6;4	tr|F1MXX6|F1MXX6_BOVIN Lactadherin OS=Bos taurus OX=9913 GN=MFGE8 PE=4 SV=1;sp|Q95114|MFGM_BOVIN Lactadherin OS=Bos taurus OX=9913 GN=MFGE8 PE=1 SV=2;tr|G3MYW7|G3MYW7_BOVIN Lactadherin OS=Bos taurus OX=9913 GN=MFGE8 PE=4 SV=1	3	6	6	6	6	6	6	2	2	1	6	6	6	2	2	1	6	6	6	2	2	1	18.6	18.6	18.6	47.846	431	431;427;379	1.6	20	5	0	54.113	By MS/MS	By MS/MS	By MS/MS	By MS/MS	By MS/MS	By MS/MS	18.6
Q1LZH9;F1MXZ0	Q1LZH9	GNS	Cytosolic	0	Q1LZH9;F1MXZ0	4;4	4;4	4;4	sp|Q1LZH9|GNS_BOVIN N-acetylglucosamine-6-sulfatase OS=Bos taurus OX=9913 GN=GNS PE=2 SV=1;tr|F1MXZ0|F1MXZ0_BOVIN N-acetylglucosamine-6-sulfatase OS=Bos taurus OX=9913 GN=GNS PE=3 SV=1	2	4	4	4	4	4	4	2	2	2	4	4	4	2	2	2	4	4	4	2	2	2	8.2	8.2	8.2	62.775	560	560;560	1.9	14	6	0	83.779	By MS/MS	By MS/MS	By MS/MS	By MS/MS	By MS/MS	By MS/MS	8.2
F1MY84	F1MY84	CSPG4	Matrisome Associated	ECM-affiliated Proteins	F1MY84	3	3	3	tr|F1MY84|F1MY84_BOVIN Chondroitin sulfate proteoglycan 4 OS=Bos taurus OX=9913 GN=CSPG4 PE=4 SV=3	1	3	3	3	2	2	1	1	1	0	2	2	1	1	1	0	2	2	1	1	1	0	1.4	1.4	1.4	250.53	2319	2319	1.86	5	2	0	18.403	By MS/MS	By MS/MS	By matching	By MS/MS	By MS/MS		1
F1MYG5	F1MYG5	LMNA	Cytoskeletal	0	F1MYG5	23	23	23	tr|F1MYG5|F1MYG5_BOVIN Lamin A/C OS=Bos taurus OX=9913 GN=LMNA PE=1 SV=1	1	23	23	23	20	18	11	12	14	2	20	18	11	12	14	2	20	18	11	12	14	2	32.7	32.7	32.7	74.126	664	664	2.17	53	34	0	201.49	By MS/MS	By MS/MS	By MS/MS	By MS/MS	By MS/MS	By MS/MS	29.7
G3MWH3;F1MYM3	G3MWH3	PIK3CB	Nuclear	0	G3MWH3;F1MYM3	1;1	1;1	1;1	tr|G3MWH3|G3MWH3_BOVIN Phosphatidylinositol-4,5-bisphosphate 3-kinase OS=Bos taurus OX=9913 GN=PIK3CB PE=3 SV=2;tr|F1MYM3|F1MYM3_BOVIN Phosphatidylinositol-4,5-bisphosphate 3-kinase OS=Bos taurus OX=9913 GN=PIK3CB PE=3 SV=2	2	1	1	1	1	1	1	1	1	0	1	1	1	1	1	0	1	1	1	1	1	0	0.9	0.9	0.9	113.18	987	987;1070	2.5	4	4	1	-2	By MS/MS	By MS/MS	By MS/MS	By MS/MS	By MS/MS		0.9
F1N0F2	F1N0F2	SIAE	Cytosolic	0	F1N0F2	12	12	12	tr|F1N0F2|F1N0F2_BOVIN Sialic acid acetylesterase OS=Bos taurus OX=9913 GN=SIAE PE=4 SV=1	1	12	12	12	12	12	10	10	11	4	12	12	10	10	11	4	12	12	10	10	11	4	28.9	28.9	28.9	59.672	533	533	2.35	44	36	0	323.31	By MS/MS	By MS/MS	By MS/MS	By MS/MS	By MS/MS	By MS/MS	28.9
F1N0K0;Q28083	F1N0K0	COL11A1	Core Matrisome	Collagens	F1N0K0;Q28083	7;5	7;5	6;4	tr|F1N0K0|F1N0K0_BOVIN Collagen alpha-1(XI) chain OS=Bos taurus OX=9913 GN=COL11A1 PE=4 SV=3;sp|Q28083|COBA1_BOVIN Collagen alpha-1(XI) chain (Fragment) OS=Bos taurus OX=9913 GN=COL11A1 PE=1 SV=1	2	7	7	6	3	4	5	4	6	1	3	4	5	4	6	1	2	3	4	3	5	1	6.7	6.7	6.1	182.41	1817	1817;911	2.39	15	13	0	255.27	By MS/MS	By MS/MS	By MS/MS	By MS/MS	By MS/MS	By matching	3.1
G3MZE5;F1N153	G3MZE5	LOC100299503	Cytosolic	0	G3MZE5;F1N153	1;1	1;1	1;1	tr|G3MZE5|G3MZE5_BOVIN THO complex subunit 2 OS=Bos taurus OX=9913 GN=LOC100299503 PE=3 SV=2;tr|F1N153|F1N153_BOVIN THO complex subunit 2 OS=Bos taurus OX=9913 GN=THOC2 PE=3 SV=3	2	1	1	1	1	1	0	0	0	0	1	1	0	0	0	0	1	1	0	0	0	0	0.6	0.6	0.6	180.89	1584	1584;1593	1	2		1	-2	By MS/MS	By MS/MS					0.6
F1N160	F1N160	0	Cytosolic	0	F1N160	8	1	0	tr|F1N160|F1N160_BOVIN Uncharacterized protein OS=Bos taurus OX=9913 PE=4 SV=3	1	8	1	0	4	4	4	6	6	3	1	0	0	0	0	0	0	0	0	0	0	0	61.2	6	0	33.943	317	317	1	1		1	-2	By MS/MS	By matching	By matching	By matching	By matching	By matching	42.9
Q2KHZ8;F1N1D5	Q2KHZ8	GBA	Membrane	0	Q2KHZ8;F1N1D5	3;3	3;3	3;3	sp|Q2KHZ8|GLCM_BOVIN Lysosomal acid glucosylceramidase OS=Bos taurus OX=9913 GN=GBA PE=2 SV=1;tr|F1N1D5|F1N1D5_BOVIN Glucosylceramidase OS=Bos taurus OX=9913 GN=GBA PE=3 SV=1	2	3	3	3	3	1	2	0	0	0	3	1	2	0	0	0	3	1	2	0	0	0	7.5	7.5	7.5	59.854	536	536;536	1	6		0	19.207	By MS/MS	By MS/MS	By MS/MS				7.5
F1N269;Q28824	F1N269	MYLK	Cytoskeletal	0	F1N269;Q28824	2;2	2;2	2;2	tr|F1N269|F1N269_BOVIN Myosin light chain kinase, smooth muscle OS=Bos taurus OX=9913 GN=MYLK PE=1 SV=3;sp|Q28824|MYLK_BOVIN Myosin light chain kinase, smooth muscle OS=Bos taurus OX=9913 GN=MYLK PE=1 SV=1	2	2	2	2	1	1	2	1	1	0	1	1	2	1	1	0	1	1	2	1	1	0	1.9	1.9	1.9	127.98	1168	1168;1176	2	4	2	0	12.421	By MS/MS	By MS/MS	By MS/MS	By matching	By MS/MS		0.9
F1N2F0	F1N2F0	HOXC9	Nuclear	0	F1N2F0	1	1	1	tr|F1N2F0|F1N2F0_BOVIN Homeobox protein OS=Bos taurus OX=9913 GN=HOXC9 PE=3 SV=2	1	1	1	1	1	0	1	0	0	0	1	0	1	0	0	0	1	0	1	0	0	0	3.1	3.1	3.1	29.234	260	260	1	2		1	-2	By MS/MS		By matching				3.1
F1N2H6	F1N2H6	CD276	Membrane	0	F1N2H6	1	1	1	tr|F1N2H6|F1N2H6_BOVIN CD276 molecule OS=Bos taurus OX=9913 GN=CD276 PE=4 SV=3	1	1	1	1	0	0	1	0	0	0	0	0	1	0	0	0	0	0	1	0	0	0	4.4	4.4	4.4	58.556	546	546	1	1		1	-2			By MS/MS				0
F1N2L7	F1N2L7	CRISP2	Cytosolic	0	F1N2L7	2	2	2	tr|F1N2L7|F1N2L7_BOVIN Cysteine rich secretory protein 2 OS=Bos taurus OX=9913 GN=CRISP2 PE=3 SV=1	1	2	2	2	2	1	0	1	1	0	2	1	0	1	1	0	2	1	0	1	1	0	10.7	10.7	10.7	27.116	244	244	2.2	3	2	0	12.99	By MS/MS	By MS/MS		By MS/MS	By MS/MS		10.7
F1N2Y2;A0A3Q1MUF0;A0A3Q1LL95;A0A3Q1LSX2;A0A3Q1MDT9	F1N2Y2	COL5A2	Core Matrisome	Collagens	F1N2Y2;A0A3Q1MUF0;A0A3Q1LL95;A0A3Q1LSX2;A0A3Q1MDT9	9;8;8;8;8	9;8;8;8;8	9;8;8;8;8	tr|F1N2Y2|F1N2Y2_BOVIN Collagen type V alpha 2 chain OS=Bos taurus OX=9913 GN=COL5A2 PE=4 SV=3;tr|A0A3Q1MUF0|A0A3Q1MUF0_BOVIN Collagen type V alpha 2 chain OS=Bos taurus OX=9913 GN=COL5A2 PE=4 SV=1;tr|A0A3Q1LL95|A0A3Q1LL95_BOVIN Collagen type V alpha 2 cha	5	9	9	9	9	7	6	8	8	0	9	7	6	8	8	0	9	7	6	8	8	0	12.4	12.4	12.4	128.38	1294	1294;965;1240;1318;1336	2.25	28	20	0	135.71	By MS/MS	By MS/MS	By MS/MS	By MS/MS	By MS/MS		12.4
F1N367;F1N368;P13608	F1N367	ACAN	Core Matrisome	Proteoglycans	F1N367;F1N368;P13608	19;19;18	19;19;18	19;19;18	tr|F1N367|F1N367_BOVIN Aggrecan core protein OS=Bos taurus OX=9913 GN=ACAN PE=3 SV=2;tr|F1N368|F1N368_BOVIN Aggrecan core protein OS=Bos taurus OX=9913 GN=ACAN PE=3 SV=2;sp|P13608|PGCA_BOVIN Aggrecan core protein OS=Bos taurus OX=9913 GN=ACAN PE=1 SV=3	3	19	19	19	14	13	14	13	13	7	14	13	14	13	13	7	14	13	14	13	13	7	9	9	9	242.73	2328	2328;2366;2364	2.37	44	37	0	161.31	By MS/MS	By MS/MS	By MS/MS	By MS/MS	By MS/MS	By MS/MS	7.1
F1N401;P25508	F1N401	COL12A1	Core Matrisome	Collagens	F1N401	21;1	21;1	21;1	tr|F1N401|F1N401_BOVIN Collagen alpha-1(XII) chain OS=Bos taurus OX=9913 GN=COL12A1 PE=4 SV=3	2	21	21	21	14	12	16	12	11	1	14	12	16	12	11	1	14	12	16	12	11	1	8.8	8.8	8.8	333	3065	3065;86	2.09	42	24	0	159.79	By MS/MS	By MS/MS	By MS/MS	By MS/MS	By MS/MS	By MS/MS	6.3
Q3ZCJ8;F1N455	Q3ZCJ8	CTSC	Matrisome Associated	ECM Regulators	Q3ZCJ8;F1N455	2;2	2;2	2;2	sp|Q3ZCJ8|CATC_BOVIN Dipeptidyl peptidase 1 OS=Bos taurus OX=9913 GN=CTSC PE=2 SV=1;tr|F1N455|F1N455_BOVIN Cathepsin C OS=Bos taurus OX=9913 GN=CTSC PE=3 SV=1	2	2	2	2	2	2	1	2	2	0	2	2	1	2	2	0	2	2	1	2	2	0	6.7	6.7	6.7	51.948	463	463;463	2.33	5	4	0	23.519	By MS/MS	By MS/MS	By matching	By MS/MS	By MS/MS		6.7
F1N5W4	F1N5W4	ENPP5	Membrane	0	F1N5W4	8	8	8	tr|F1N5W4|F1N5W4_BOVIN Ectonucleotide pyrophosphatase/phosphodiesterase family member 5 OS=Bos taurus OX=9913 GN=ENPP5 PE=4 SV=3	1	8	8	8	8	8	6	7	7	2	8	8	6	7	7	2	8	8	6	7	7	2	21	21	21	54.281	477	477	2.26	36	26	0	277.58	By MS/MS	By MS/MS	By MS/MS	By MS/MS	By MS/MS	By MS/MS	21
P46193;F1N650	P46193	ANXA1 ANX1	Cytosolic	0	P46193;F1N650	6;6	6;6	6;6	sp|P46193|ANXA1_BOVIN Annexin A1 OS=Bos taurus OX=9913 GN=ANXA1 PE=1 SV=2;tr|F1N650|F1N650_BOVIN Annexin OS=Bos taurus OX=9913 GN=ANXA1 PE=3 SV=1	2	6	6	6	6	6	4	6	6	2	6	6	4	6	6	2	6	6	4	6	6	2	20.5	20.5	20.5	38.951	346	346;346	2.38	20	17	0	126.9	By MS/MS	By MS/MS	By MS/MS	By MS/MS	By MS/MS	By matching	20.5
F1N6Y7	F1N6Y7	EIF5B	Cytosolic	0	F1N6Y7	1	1	1	tr|F1N6Y7|F1N6Y7_BOVIN Eukaryotic translation initiation factor 5B OS=Bos taurus OX=9913 GN=EIF5B PE=1 SV=3	1	1	1	1	1	1	1	1	1	0	1	1	1	1	1	0	1	1	1	1	1	0	0.7	0.7	0.7	138.33	1219	1219	2.2	3	2	0.00978	6.123	By MS/MS	By MS/MS	By MS/MS	By MS/MS	By MS/MS		0.7
F1N734	F1N734	CHD6	Nuclear	0	F1N734	1	1	1	tr|F1N734|F1N734_BOVIN DNA helicase OS=Bos taurus OX=9913 GN=CHD6 PE=3 SV=3	1	1	1	1	0	0	0	0	0	1	0	0	0	0	0	1	0	0	0	0	0	1	0.7	0.7	0.7	304.95	2721	2721	4		1	0.0029412	6.5315						By MS/MS	0
F1N748	F1N748	GPRIN1	Membrane	0	F1N748	1	1	1	tr|F1N748|F1N748_BOVIN G protein regulated inducer of neurite outgrowth 1 OS=Bos taurus OX=9913 GN=GPRIN1 PE=4 SV=3	1	1	1	1	0	0	0	0	1	1	0	0	0	0	1	1	0	0	0	0	1	1	1	1	1	94.533	922	922	4		2	1	-2					By matching	By MS/MS	0
F1N773	F1N773	CNKSR2	Membrane	0	F1N773	1	1	1	tr|F1N773|F1N773_BOVIN Connector enhancer of kinase suppressor of Ras 2 OS=Bos taurus OX=9913 GN=CNKSR2 PE=3 SV=3	1	1	1	1	0	0	1	0	0	0	0	0	1	0	0	0	0	0	1	0	0	0	1	1	1	117.78	1036	1036	1	2		1	-2			By MS/MS				0
F6QH94;A0A3Q1MRD2	F6QH94	PDIA6	Membrane	0	F6QH94;A0A3Q1MRD2	6;4	6;4	6;4	tr|F6QH94|F6QH94_BOVIN Protein disulfide isomerase family A member 6 OS=Bos taurus OX=9913 GN=PDIA6 PE=1 SV=1;tr|A0A3Q1MRD2|A0A3Q1MRD2_BOVIN Uncharacterized protein OS=Bos taurus OX=9913 PE=3 SV=1	2	6	6	6	6	3	4	4	4	0	6	3	4	4	4	0	6	3	4	4	4	0	20	20	20	48.141	440	440;440	2.14	13	8	0	45.597	By MS/MS	By MS/MS	By MS/MS	By MS/MS	By MS/MS		20
F6QIT9	F6QIT9	RNASET2	Cytosolic	0	F6QIT9	1	1	1	tr|F6QIT9|F6QIT9_BOVIN Uncharacterized protein OS=Bos taurus OX=9913 GN=RNASET2 PE=3 SV=1	1	1	1	1	1	1	0	0	0	0	1	1	0	0	0	0	1	1	0	0	0	0	6.9	6.9	6.9	28.152	247	247	1	2		0	6.6974	By MS/MS	By MS/MS					6.9
F6R4N7	F6R4N7	SOD3	Nuclear	0	F6R4N7	2	2	2	tr|F6R4N7|F6R4N7_BOVIN Superoxide dismutase [Cu-Zn] OS=Bos taurus OX=9913 GN=SOD3 PE=1 SV=1	1	2	2	2	2	2	2	2	2	0	2	2	2	2	2	0	2	2	2	2	2	0	11.5	11.5	11.5	27.39	252	252	2.2	6	4	0	17.654	By MS/MS	By MS/MS	By MS/MS	By MS/MS	By MS/MS		11.5
F6RVN5	F6RVN5	DZIP3	Cytosolic	0	F6RVN5	1	1	1	tr|F6RVN5|F6RVN5_BOVIN RING-type E3 ubiquitin transferase OS=Bos taurus OX=9913 GN=DZIP3 PE=4 SV=1	1	1	1	1	0	0	0	1	1	0	0	0	0	1	1	0	0	0	0	1	1	0	0.9	0.9	0.9	116.27	1020	1020	4		2	1	-2				By MS/MS	By MS/MS		0
G3MWX0	G3MWX0	FAM189B	Membrane	0	G3MWX0	1	1	1	tr|G3MWX0|G3MWX0_BOVIN Family with sequence similarity 189 member B OS=Bos taurus OX=9913 GN=FAM189B PE=3 SV=1	1	1	1	1	0	0	1	0	0	0	0	0	1	0	0	0	0	0	1	0	0	0	1.3	1.3	1.3	71.541	669	669	1	1		1	-2			By MS/MS				0
G3MXA2	G3MXA2	SHISA9	Membrane	0	G3MXA2	1	1	1	tr|G3MXA2|G3MXA2_BOVIN Shisa family member 9 OS=Bos taurus OX=9913 GN=SHISA9 PE=4 SV=2	1	1	1	1	0	0	1	0	0	0	0	0	1	0	0	0	0	0	1	0	0	0	4.9	4.9	4.9	27.184	245	245	1	1		0.002809	6.4115			By MS/MS				0
G3MXB9	G3MXB9	C28H10orf71	Cytosolic	0	G3MXB9	1	1	1	tr|G3MXB9|G3MXB9_BOVIN Chromosome 28 C10orf71 homolog OS=Bos taurus OX=9913 GN=C28H10orf71 PE=4 SV=2	1	1	1	1	0	0	0	0	0	1	0	0	0	0	0	1	0	0	0	0	0	1	0.6	0.6	0.6	155.6	1434	1434	4		1	1	-2						By MS/MS	0
G3MXN4	G3MXN4	NRIP1	Nuclear	0	G3MXN4	1	1	1	tr|G3MXN4|G3MXN4_BOVIN Nuclear receptor interacting protein 1 OS=Bos taurus OX=9913 GN=NRIP1 PE=4 SV=2	1	1	1	1	0	0	0	0	0	1	0	0	0	0	0	1	0	0	0	0	0	1	1.5	1.5	1.5	126.37	1156	1156	4		1	0.0054645	6.3413						By MS/MS	0
P80025;G3MXZ0	P80025	LPO	Cytosolic	0	P80025;G3MXZ0	1;1	1;1	1;1	sp|P80025|PERL_BOVIN Lactoperoxidase OS=Bos taurus OX=9913 GN=LPO PE=1 SV=1;tr|G3MXZ0|G3MXZ0_BOVIN Lactoperoxidase OS=Bos taurus OX=9913 GN=LPO PE=1 SV=2	2	1	1	1	0	0	1	0	0	0	0	0	1	0	0	0	0	0	1	0	0	0	1.1	1.1	1.1	80.641	712	712;731	1	1		1	-2			By MS/MS				0
G3MZI7	G3MZI7	COL5A1	Core Matrisome	Collagens	G3MZI7	3	2	2	tr|G3MZI7|G3MZI7_BOVIN Collagen type V alpha 1 chain OS=Bos taurus OX=9913 GN=COL5A1 PE=4 SV=2	1	3	2	2	3	3	2	2	2	0	2	2	1	1	1	0	2	2	1	1	1	0	2.8	2.1	2.1	184.86	1847	1847	1.75	6	2	0	15.335	By MS/MS	By MS/MS	By MS/MS	By MS/MS	By MS/MS		2.8
Q28161;G3N156	Q28161	PKP1	Nuclear	0	Q28161;G3N156	1;1	1;1	1;1	sp|Q28161|PKP1_BOVIN Plakophilin-1 OS=Bos taurus OX=9913 GN=PKP1 PE=2 SV=1;tr|G3N156|G3N156_BOVIN Plakophilin-1 OS=Bos taurus OX=9913 GN=PKP1 PE=3 SV=2	2	1	1	1	0	0	0	0	0	1	0	0	0	0	0	1	0	0	0	0	0	1	1.1	1.1	1.1	80.179	727	727;727	4		1	0	7.0706						By MS/MS	0
G3N1U4;A0A452DJA9	G3N1U4	SERPINA3-3	Cytosolic	0	G3N1U4;A0A452DJA9	7;5	1;1	1;1	tr|G3N1U4|G3N1U4_BOVIN Serpin A3-3 OS=Bos taurus OX=9913 GN=SERPINA3-3 PE=1 SV=1;tr|A0A452DJA9|A0A452DJA9_BOVIN Serpin A3-3 OS=Bos taurus OX=9913 GN=SERPINA3-3 PE=1 SV=1	2	7	1	1	6	6	3	4	4	2	1	1	1	1	1	1	1	1	1	1	1	1	16.3	4.6	4.6	46.156	411	411;400	2.5	3	3	0	35.049	By MS/MS	By MS/MS	By MS/MS	By MS/MS	By MS/MS	By MS/MS	16.3
G3N2L2	G3N2L2	RCN1	Cytosolic	0	G3N2L2	3	3	3	tr|G3N2L2|G3N2L2_BOVIN Reticulocalbin 1 OS=Bos taurus OX=9913 GN=RCN1 PE=1 SV=2	1	3	3	3	3	3	3	1	2	1	3	3	3	1	2	1	3	3	3	1	2	1	11.5	11.5	11.5	38.82	331	331	1.71	13	4	0	31.245	By MS/MS	By MS/MS	By MS/MS	By MS/MS	By MS/MS	By matching	11.5
G3N2W6	G3N2W6	0	Cytosolic	0	G3N2W6	1	1	1	tr|G3N2W6|G3N2W6_BOVIN Uncharacterized protein OS=Bos taurus OX=9913 PE=3 SV=2	1	1	1	1	1	1	0	0	0	0	1	1	0	0	0	0	1	1	0	0	0	0	2.4	2.4	2.4	31.488	293	293	1	2		0.0029326	6.5266	By MS/MS	By MS/MS					2.4
G3X6L8	G3X6L8	NIPSNAP3A	Cytosolic	0	G3X6L8	3	3	3	tr|G3X6L8|G3X6L8_BOVIN Uncharacterized protein OS=Bos taurus OX=9913 GN=NIPSNAP3A PE=3 SV=1	1	3	3	3	2	3	1	1	1	0	2	3	1	1	1	0	2	3	1	1	1	0	13.4	13.4	13.4	28.523	247	247	1.75	6	2	0	19.015	By MS/MS	By MS/MS	By MS/MS	By MS/MS	By MS/MS		9.7
G3X6W2	G3X6W2	RAD50	Nuclear	0	G3X6W2	1	1	1	tr|G3X6W2|G3X6W2_BOVIN RAD50 double strand break repair protein OS=Bos taurus OX=9913 GN=RAD50 PE=3 SV=1	1	1	1	1	0	0	0	0	1	0	0	0	0	0	1	0	0	0	0	0	1	0	0.9	0.9	0.9	153.7	1312	1312	4		1	1	-2					By MS/MS		0
G5E507;Q76LV1;A0A3Q1MBX2;Q76LV2;A0A452DI85;G3N2V5	G5E507	HSP90AB1	Nuclear	0	G5E507;Q76LV1;A0A3Q1MBX2;Q76LV2;A0A452DI85	3;3;2;2;2;1	2;2;2;2;2;0	2;2;2;2;2;0	tr|G5E507|G5E507_BOVIN Heat shock protein HSP 90-beta OS=Bos taurus OX=9913 GN=HSP90AB1 PE=1 SV=2;sp|Q76LV1|HS90B_BOVIN Heat shock protein HSP 90-beta OS=Bos taurus OX=9913 GN=HSP90AB1 PE=2 SV=3;tr|A0A3Q1MBX2|A0A3Q1MBX2_BOVIN Uncharacterized protein OS=Bos	6	3	2	2	2	3	2	0	0	0	1	2	1	0	0	0	1	2	1	0	0	0	4.4	2.7	2.7	81.722	712	712;724;307;733;734;443	1	4		0	12.926	By MS/MS	By MS/MS	By matching				2.9
G5E5A8;A0A3Q1M4K6;A0A3Q1NHX9;P07589;G5E5B0;G5E5A9	G5E5A8	FN1	Core Matrisome	ECM Glycoproteins	G5E5A8;A0A3Q1M4K6;A0A3Q1NHX9;P07589;G5E5B0;G5E5A9	19;18;18;18;18;18	19;18;18;18;18;18	19;18;18;18;18;18	tr|G5E5A8|G5E5A8_BOVIN Fibronectin OS=Bos taurus OX=9913 GN=FN1 PE=4 SV=1;tr|A0A3Q1M4K6|A0A3Q1M4K6_BOVIN Fibronectin OS=Bos taurus OX=9913 GN=FN1 PE=4 SV=1;tr|A0A3Q1NHX9|A0A3Q1NHX9_BOVIN Fibronectin OS=Bos taurus OX=9913 GN=FN1 PE=4 SV=1;sp|P07589|FINC_BOV	6	19	19	19	15	15	9	12	13	2	15	15	9	12	13	2	15	15	9	12	13	2	11.8	11.8	11.8	275.55	2510	2510;2163;2268;2478;2511;2601	2.23	39	27	0	178.02	By MS/MS	By MS/MS	By MS/MS	By MS/MS	By MS/MS	By matching	9.4
G5E5C8;Q2TBL6	G5E5C8	TALDO1	Nuclear	0	G5E5C8;Q2TBL6	12;11	12;11	12;11	tr|G5E5C8|G5E5C8_BOVIN Transaldolase OS=Bos taurus OX=9913 GN=TALDO1 PE=1 SV=1;sp|Q2TBL6|TALDO_BOVIN Transaldolase OS=Bos taurus OX=9913 GN=TALDO1 PE=2 SV=1	2	12	12	12	11	11	9	9	9	3	11	11	9	9	9	3	11	11	9	9	9	3	30.9	30.9	30.9	37.681	337	337;337	2.12	40	24	0	323.31	By MS/MS	By MS/MS	By MS/MS	By MS/MS	By MS/MS	By MS/MS	28.8
G5E5V1;A0A3Q1MBT3;A0A3Q1LFV7;G5E5H2;A0A3Q1LI44;A0A3Q1MIT3;A0A3Q1MKI2;A0A3Q1MT50	G5E5V1	0	Cytosolic	0	G5E5V1;A0A3Q1MBT3;A0A3Q1LFV7;G5E5H2;A0A3Q1LI44;A0A3Q1MIT3;A0A3Q1MKI2;A0A3Q1MT50	2;1;1;1;1;1;1;1	1;1;1;1;0;1;1;1	1;1;1;1;0;1;1;1	tr|G5E5V1|G5E5V1_BOVIN Ig-like domain-containing protein OS=Bos taurus OX=9913 PE=4 SV=2;tr|A0A3Q1MBT3|A0A3Q1MBT3_BOVIN Ig-like domain-containing protein OS=Bos taurus OX=9913 PE=4 SV=1;tr|A0A3Q1LFV7|A0A3Q1LFV7_BOVIN Ig-like domain-containing protein OS=Bo	8	2	1	1	2	2	2	2	2	0	1	1	1	1	1	0	1	1	1	1	1	0	19.1	6.6	6.6	14.1	136	136;119;134;139;143;147;176;231	2.2	3	2	0	6.8731	By MS/MS	By MS/MS	By MS/MS	By MS/MS	By MS/MS		19.1
G8JKW7	G8JKW7	SERPINA3-7	Cytosolic	0	G8JKW7	6	1	0	tr|G8JKW7|G8JKW7_BOVIN Serpin A3-7 OS=Bos taurus OX=9913 GN=SERPINA3-7 PE=3 SV=2	1	6	1	0	3	5	1	4	3	2	0	1	0	0	0	0	0	0	0	0	0	0	13	3.9	0	46.575	415	415	1	1		0	7.1908	By matching	By MS/MS	By matching	By matching	By matching	By matching	6.5
O46375;A0A3Q1MRM2	O46375	TTR	Cytosolic	0	O46375;A0A3Q1MRM2	8;5	8;5	8;5	sp|O46375|TTHY_BOVIN Transthyretin OS=Bos taurus OX=9913 GN=TTR PE=1 SV=1;tr|A0A3Q1MRM2|A0A3Q1MRM2_BOVIN Transthyretin OS=Bos taurus OX=9913 GN=TTR PE=3 SV=1	2	8	8	8	7	7	6	7	7	2	7	7	6	7	7	2	7	7	6	7	7	2	60.5	60.5	60.5	15.727	147	147;181	2.14	49	30	0	323.31	By MS/MS	By MS/MS	By MS/MS	By MS/MS	By MS/MS	By MS/MS	56.5
O97680	O97680	TXN	Cytosolic	0	O97680	6	6	6	sp|O97680|THIO_BOVIN Thioredoxin OS=Bos taurus OX=9913 GN=TXN PE=3 SV=3	1	6	6	6	3	4	3	5	6	3	3	4	3	5	6	3	3	4	3	5	6	3	35.2	35.2	35.2	11.812	105	105	2.81	17	26	0	226.71	By MS/MS	By MS/MS	By MS/MS	By MS/MS	By MS/MS	By MS/MS	29.5
P00442;F1MNQ4	P00442	SOD1	Nuclear	0	P00442;F1MNQ4	10;8	10;8	10;8	sp|P00442|SODC_BOVIN Superoxide dismutase [Cu-Zn] OS=Bos taurus OX=9913 GN=SOD1 PE=1 SV=2;tr|F1MNQ4|F1MNQ4_BOVIN Superoxide dismutase [Cu-Zn] OS=Bos taurus OX=9913 PE=3 SV=2	2	10	10	10	5	7	7	7	9	4	5	7	7	7	9	4	5	7	7	7	9	4	48.7	48.7	48.7	15.682	152	152;152	2.47	47	45	0	323.31	By MS/MS	By MS/MS	By MS/MS	By MS/MS	By MS/MS	By MS/MS	32.2
P00727	P00727	LAP3	Cytosolic	0	P00727	1	1	1	sp|P00727|AMPL_BOVIN Cytosol aminopeptidase OS=Bos taurus OX=9913 GN=LAP3 PE=1 SV=3	1	1	1	1	0	0	0	0	0	1	0	0	0	0	0	1	0	0	0	0	0	1	2.3	2.3	2.3	56.289	519	519	4		1	0.0097324	6.1185						By MS/MS	0
P00921;F1N0H3;A0A3Q1MM44	P00921	CA2	Cytosolic	0	P00921;F1N0H3;A0A3Q1MM44	6;5;3	6;5;3	6;5;3	sp|P00921|CAH2_BOVIN Carbonic anhydrase 2 OS=Bos taurus OX=9913 GN=CA2 PE=1 SV=3;tr|F1N0H3|F1N0H3_BOVIN Carbonic anhydrase OS=Bos taurus OX=9913 GN=CA2 PE=1 SV=3;tr|A0A3Q1MM44|A0A3Q1MM44_BOVIN Carbonic anhydrase OS=Bos taurus OX=9913 GN=CA2 PE=1 SV=1	3	6	6	6	6	5	4	3	2	1	6	5	4	3	2	1	6	5	4	3	2	1	30.8	30.8	30.8	29.113	260	260;260;239	1.86	15	6	0	38.162	By MS/MS	By MS/MS	By MS/MS	By MS/MS	By MS/MS	By MS/MS	30.8
P01017;Q3SZH5;CON__Q3SZH5	P01017	AGT SERPINA8	Cytosolic	0	P01017;Q3SZH5;CON__Q3SZH5	4;3;3	4;3;3	4;3;3	sp|P01017|ANGT_BOVIN Angiotensinogen OS=Bos taurus OX=9913 GN=AGT PE=1 SV=2;tr|Q3SZH5|Q3SZH5_BOVIN Angiotensin 1-10 OS=Bos taurus OX=9913 GN=AGT PE=2 SV=1;	3	4	4	4	3	4	1	1	1	1	3	4	1	1	1	1	3	4	1	1	1	1	13	13	13	51.424	476	476;424;424	1.82	8	3	0	38.922	By MS/MS	By MS/MS	By MS/MS	By MS/MS	By MS/MS	By matching	9.9
P02453	P02453	COL1A1	Core Matrisome	Collagens	P02453	28	27	27	sp|P02453|CO1A1_BOVIN Collagen alpha-1(I) chain OS=Bos taurus OX=9913 GN=COL1A1 PE=1 SV=3	1	28	27	27	20	18	21	22	21	8	19	17	20	21	20	8	19	17	20	21	20	8	33.7	32.7	32.7	138.94	1463	1463	2.4	64	56	0	323.31	By MS/MS	By MS/MS	By MS/MS	By MS/MS	By MS/MS	By MS/MS	28.7
P02459	P02459	COL2A1	Core Matrisome	Collagens	P02459	31	31	30	sp|P02459|CO2A1_BOVIN Collagen alpha-1(II) chain OS=Bos taurus OX=9913 GN=COL2A1 PE=1 SV=4	1	31	31	30	25	27	21	24	25	1	25	27	21	24	25	1	24	26	20	23	24	1	30.3	30.3	29.3	141.83	1487	1487	2.24	109	77	0	323.31	By MS/MS	By MS/MS	By MS/MS	By MS/MS	By MS/MS	By matching	26.1
P04272	P04272	ANXA2 ANX2	Cytosolic	0	P04272	18	18	18	sp|P04272|ANXA2_BOVIN Annexin A2 OS=Bos taurus OX=9913 GN=ANXA2 PE=1 SV=2	1	18	18	18	17	17	13	13	13	6	17	17	13	13	13	6	17	17	13	13	13	6	45.4	45.4	45.4	38.612	339	339	2.12	62	37	0	323.31	By MS/MS	By MS/MS	By MS/MS	By MS/MS	By MS/MS	By MS/MS	45.4
P05630	P05630	ATP5F1D ATP5D	Cytosolic	0	P05630	1	1	1	sp|P05630|ATPD_BOVIN ATP synthase subunit delta, mitochondrial OS=Bos taurus OX=9913 GN=ATP5F1D PE=1 SV=2	1	1	1	1	0	0	0	1	1	0	0	0	0	1	1	0	0	0	0	1	1	0	8.3	8.3	8.3	17.612	168	168	4		2	0	7.668				By MS/MS	By MS/MS		0
P07107;A0A3Q1M8I0	P07107	DBI	Nuclear	0	P07107;A0A3Q1M8I0	5;3	5;3	5;3	sp|P07107|ACBP_BOVIN Acyl-CoA-binding protein OS=Bos taurus OX=9913 GN=DBI PE=1 SV=2;tr|A0A3Q1M8I0|A0A3Q1M8I0_BOVIN Acyl-CoA-binding protein OS=Bos taurus OX=9913 GN=DBI PE=1 SV=1	2	5	5	5	3	4	4	3	2	1	3	4	4	3	2	1	3	4	4	3	2	1	63.2	63.2	63.2	10.044	87	87;94	2	20	10	0	33.399	By MS/MS	By MS/MS	By MS/MS	By MS/MS	By MS/MS	By MS/MS	33.3
P07507	P07507	MGP	Core Matrisome	ECM Glycoproteins	P07507	1	1	1	sp|P07507|MGP_BOVIN Matrix Gla protein OS=Bos taurus OX=9913 GN=MGP PE=1 SV=1	1	1	1	1	0	0	0	1	1	0	0	0	0	1	1	0	0	0	0	1	1	0	10.7	10.7	10.7	12.217	103	103	4		2	0.0054054	6.3188				By MS/MS	By MS/MS		0
P07688	P07688	CTSB	Matrisome Associated	ECM Regulators	P07688	1	1	1	sp|P07688|CATB_BOVIN Cathepsin B OS=Bos taurus OX=9913 GN=CTSB PE=1 SV=5	1	1	1	1	0	0	1	0	0	0	0	0	1	0	0	0	0	0	1	0	0	0	4.2	4.2	4.2	36.661	335	335	1	1		0.0053619	6.3032			By MS/MS				0
P09487	P09487	ALPL	Membrane	0	P09487	1	1	1	sp|P09487|PPBT_BOVIN Alkaline phosphatase, tissue-nonspecific isozyme OS=Bos taurus OX=9913 GN=ALPL PE=1 SV=2	1	1	1	1	0	0	1	0	0	0	0	0	1	0	0	0	0	0	1	0	0	0	2.3	2.3	2.3	57.192	524	524	1	1		0.0051282	6.1884			By MS/MS				0
P63048;P62992;P0CG53;P0CH28;A0A3Q1M4K3;A0A3Q1MYD8;A0A3Q1LU30	P63048	UBA52 UBCEP2	Cytosolic	0	P63048;P62992;P0CG53;P0CH28;A0A3Q1M4K3	7;7;7;7;6;3;1	7;7;7;7;6;3;1	7;7;7;7;6;3;1	sp|P63048|RL40_BOVIN Ubiquitin-60S ribosomal protein L40 OS=Bos taurus OX=9913 GN=UBA52 PE=1 SV=2;sp|P62992|RS27A_BOVIN Ubiquitin-40S ribosomal protein S27a OS=Bos taurus OX=9913 GN=RPS27A PE=1 SV=2;sp|P0CG53|UBB_BOVIN Polyubiquitin-B OS=Bos taurus OX=9913	7	7	7	7	5	6	5	7	7	4	5	6	5	7	7	4	5	6	5	7	7	4	47.7	47.7	47.7	14.728	128	128;156;305;690;77;194;141	2.36	40	33	0	323.31	By MS/MS	By MS/MS	By MS/MS	By MS/MS	By MS/MS	By MS/MS	46.1
P10790	P10790	FABP3	Cytosolic	0	P10790	4	4	4	sp|P10790|FABPH_BOVIN Fatty acid-binding protein, heart OS=Bos taurus OX=9913 GN=FABP3 PE=1 SV=2	1	4	4	4	4	3	2	2	2	0	4	3	2	2	2	0	4	3	2	2	2	0	27.8	27.8	27.8	14.779	133	133	2.12	10	6	0	46.962	By MS/MS	By MS/MS	By MS/MS	By MS/MS	By MS/MS		27.8
P12344	P12344	GOT2	Membrane	0	P12344	1	1	1	sp|P12344|AATM_BOVIN Aspartate aminotransferase, mitochondrial OS=Bos taurus OX=9913 GN=GOT2 PE=1 SV=2	1	1	1	1	1	0	1	0	0	0	1	0	1	0	0	0	1	0	1	0	0	0	3.3	3.3	3.3	47.513	430	430	1	2		0	7.9391	By MS/MS		By matching				3.3
P13696;A0A3Q1LX99	P13696	PEBP1 PBP PEBP	Cytosolic	0	P13696;A0A3Q1LX99	6;3	6;3	6;3	sp|P13696|PEBP1_BOVIN Phosphatidylethanolamine-binding protein 1 OS=Bos taurus OX=9913 GN=PEBP1 PE=1 SV=2;tr|A0A3Q1LX99|A0A3Q1LX99_BOVIN Uncharacterized protein OS=Bos taurus OX=9913 PE=3 SV=1	2	6	6	6	5	5	4	6	5	1	5	5	4	6	5	1	5	5	4	6	5	1	41.2	41.2	41.2	20.985	187	187;187	2.2	18	12	0	105.31	By MS/MS	By MS/MS	By MS/MS	By MS/MS	By MS/MS	By MS/MS	36.4
P20456	P20456	IMPA1 IMPA	Cytosolic	0	P20456	3	3	3	sp|P20456|IMPA1_BOVIN Inositol monophosphatase 1 OS=Bos taurus OX=9913 GN=IMPA1 PE=1 SV=1	1	3	3	3	2	3	2	2	2	1	2	3	2	2	2	1	2	3	2	2	2	1	12.6	12.6	12.6	30.055	277	277	2.25	7	5	0	18.757	By MS/MS	By MS/MS	By MS/MS	By MS/MS	By MS/MS	By matching	8.7
P21809	P21809	BGN	Core Matrisome	Proteoglycans	P21809	2	2	2	sp|P21809|PGS1_BOVIN Biglycan OS=Bos taurus OX=9913 GN=BGN PE=1 SV=3	1	2	2	2	2	2	1	1	1	0	2	2	1	1	1	0	2	2	1	1	1	0	8.7	8.7	8.7	41.59	369	369	1.86	5	2	0	12.718	By MS/MS	By MS/MS	By matching	By MS/MS	By MS/MS		8.7
P22226	P22226	CATHL1 BAC1	Cytosolic	0	P22226	3	3	3	sp|P22226|CTHL1_BOVIN Cathelicidin-1 OS=Bos taurus OX=9913 GN=CATHL1 PE=1 SV=2	1	3	3	3	2	2	1	3	3	2	2	2	1	3	3	2	2	2	1	3	3	2	22.6	22.6	22.6	17.6	155	155	2.85	5	8	0	82.605	By MS/MS	By MS/MS	By MS/MS	By MS/MS	By MS/MS	By MS/MS	22.6
P24627	P24627	LTF	Cytosolic	0	P24627	18	16	16	sp|P24627|TRFL_BOVIN Lactotransferrin OS=Bos taurus OX=9913 GN=LTF PE=1 SV=2	1	18	16	16	13	14	9	13	13	7	12	13	8	12	12	5	12	13	8	12	12	5	23.4	22.3	22.3	78.056	708	708	2.44	40	37	0	275.02	By MS/MS	By MS/MS	By MS/MS	By MS/MS	By MS/MS	By MS/MS	17.4
P25326	P25326	CTSS	Matrisome Associated	ECM Regulators	P25326	2	2	2	sp|P25326|CATS_BOVIN Cathepsin S OS=Bos taurus OX=9913 GN=CTSS PE=1 SV=2	1	2	2	2	2	1	1	1	1	0	2	1	1	1	1	0	2	1	1	1	1	0	8.8	8.8	8.8	37.176	331	331	2	4	2	0	14.824	By MS/MS	By MS/MS	By MS/MS	By MS/MS	By MS/MS		8.8
P25417	P25417	CSTB CST6	Cytosolic	0	P25417	4	4	1	sp|P25417|CYTB_BOVIN Cystatin-B OS=Bos taurus OX=9913 GN=CSTB PE=1 SV=1	1	4	4	1	3	3	3	3	4	0	3	3	3	3	4	0	0	0	0	1	1	0	51	51	9.2	11.139	98	98	2.25	21	15	0	34.483	By MS/MS	By MS/MS	By MS/MS	By MS/MS	By MS/MS		41.8
P26884	P26884	FKBP3	Nuclear	0	P26884	1	1	1	sp|P26884|FKBP3_BOVIN Peptidyl-prolyl cis-trans isomerase FKBP3 OS=Bos taurus OX=9913 GN=FKBP3 PE=1 SV=2	1	1	1	1	1	1	0	1	0	0	1	1	0	1	0	0	1	1	0	1	0	0	4.9	4.9	4.9	25.191	224	224	2	2	1	0.010076	6.1534	By MS/MS	By matching		By MS/MS			4.9
P28782	P28782	S100A8	Matrisome Associated	Secreted Factors	P28782	1	1	1	sp|P28782|S10A8_BOVIN Protein S100-A8 OS=Bos taurus OX=9913 GN=S100A8 PE=1 SV=2	1	1	1	1	1	1	1	1	1	1	1	1	1	1	1	1	1	1	1	1	1	1	23.6	23.6	23.6	10.46	89	89	2.5	3	3	0	207.7	By MS/MS	By MS/MS	By MS/MS	By MS/MS	By MS/MS	By MS/MS	23.6
P32871	P32871	PIK3CA	Membrane	0	P32871	1	1	1	sp|P32871|PK3CA_BOVIN Phosphatidylinositol 4,5-bisphosphate 3-kinase catalytic subunit alpha isoform OS=Bos taurus OX=9913 GN=PIK3CA PE=1 SV=1	1	1	1	1	0	0	0	1	1	0	0	0	0	1	1	0	0	0	0	1	1	0	0.7	0.7	0.7	124.33	1068	1068	4		2	1	-2				By MS/MS	By MS/MS		0
P33097	P33097	GOT1	Cytosolic	0	P33097	13	13	13	sp|P33097|AATC_BOVIN Aspartate aminotransferase, cytoplasmic OS=Bos taurus OX=9913 GN=GOT1 PE=1 SV=3	1	13	13	13	12	11	7	10	9	4	12	11	7	10	9	4	12	11	7	10	9	4	40	40	40	46.398	413	413	2.25	32	23	0	98.559	By MS/MS	By MS/MS	By MS/MS	By MS/MS	By MS/MS	By MS/MS	38.3
P35466	P35466	S100A4 CAPL	Cytosolic	0	P35466	2	2	2	sp|P35466|S10A4_BOVIN Protein S100-A4 OS=Bos taurus OX=9913 GN=S100A4 PE=1 SV=2	1	2	2	2	2	2	1	1	1	0	2	2	1	1	1	0	2	2	1	1	1	0	8.9	8.9	8.9	11.807	101	101	2.2	6	4	0	19.652	By MS/MS	By MS/MS	By MS/MS	By MS/MS	By MS/MS		8.9
P41500	P41500	ACYP1 ACYPE	Cytosolic	0	P41500	7	7	7	sp|P41500|ACYP1_BOVIN Acylphosphatase-1 OS=Bos taurus OX=9913 GN=ACYP1 PE=1 SV=2	1	7	7	7	6	7	5	5	6	2	6	7	5	5	6	2	6	7	5	5	6	2	65.3	65.3	65.3	11.432	101	101	2.11	22	13	0	151.35	By MS/MS	By MS/MS	By MS/MS	By MS/MS	By MS/MS	By MS/MS	53.5
P42899;F1MH76	P42899	RPLP2	Cytosolic	0	P42899;F1MH76	2;1	2;1	2;1	sp|P42899|RLA2_BOVIN 60S acidic ribosomal protein P2 OS=Bos taurus OX=9913 GN=RPLP2 PE=3 SV=1;tr|F1MH76|F1MH76_BOVIN 60S acidic ribosomal protein P2 OS=Bos taurus OX=9913 PE=3 SV=2	2	2	2	2	1	2	1	2	2	0	1	2	1	2	2	0	1	2	1	2	2	0	24.3	24.3	24.3	11.702	115	115;130	2.5	4	4	0	17.858	By MS/MS	By MS/MS	By MS/MS	By MS/MS	By MS/MS		13.9
P48616;O62654;A6QQJ3;A0A3Q1MVU3;Q28115;A0A3Q1MHT3	P48616	VIM	Cytoskeletal	0	P48616	23;5;3;2;2;2	22;5;3;1;1;1	19;2;1;1;1;1	sp|P48616|VIME_BOVIN Vimentin OS=Bos taurus OX=9913 GN=VIM PE=1 SV=3	6	23	22	19	15	17	13	15	14	2	15	17	13	14	13	1	13	15	11	12	13	0	39.1	37.6	33.7	53.727	466	466;470;469;417;428;501	2.13	53	32	0	323.31	By MS/MS	By MS/MS	By MS/MS	By MS/MS	By MS/MS	By MS/MS	29.6
P52175;P52174	P52175	NME1-2	Cytosolic	0	P52175;P52174	3;3	3;3	1;1	sp|P52175|NDKA2_BOVIN Nucleoside diphosphate kinase A 2 OS=Bos taurus OX=9913 GN=NME1-2 PE=1 SV=3;sp|P52174|NDKA1_BOVIN Nucleoside diphosphate kinase A 1 OS=Bos taurus OX=9913 GN=NME1-1 PE=1 SV=3	2	3	3	1	3	3	3	2	2	1	3	3	3	2	2	1	1	1	1	0	0	1	28.3	28.3	9.2	17.298	152	152;152	1.9	14	6	0	21.331	By MS/MS	By MS/MS	By MS/MS	By MS/MS	By MS/MS	By MS/MS	28.3
P55052	P55052	FABP5	Nuclear	0	P55052	4	4	4	sp|P55052|FABP5_BOVIN Fatty acid-binding protein 5 OS=Bos taurus OX=9913 GN=FABP5 PE=1 SV=4	1	4	4	4	3	3	3	3	3	1	3	3	3	3	3	1	3	3	3	3	3	1	17	17	17	15.074	135	135	2.22	16	11	0	60.898	By MS/MS	By MS/MS	By MS/MS	By MS/MS	By MS/MS	By MS/MS	10.4
P55252;A8E4P9	P55252	HAPLN1 CRTL1	Cytosolic	0	P55252;A8E4P9	7;4	7;4	7;4	sp|P55252|HPLN1_BOVIN Hyaluronan and proteoglycan link protein 1 OS=Bos taurus OX=9913 GN=HAPLN1 PE=2 SV=1;tr|A8E4P9|A8E4P9_BOVIN HAPLN1 protein OS=Bos taurus OX=9913 GN=HAPLN1 PE=2 SV=1	2	7	7	7	5	4	4	4	4	1	5	4	4	4	4	1	5	4	4	4	4	1	20.9	20.9	20.9	40.287	354	354;180	2.23	13	9	0	143.04	By MS/MS	By MS/MS	By MS/MS	By MS/MS	By MS/MS	By MS/MS	16.4
P56965	P56965	DDAH1	Cytosolic	0	P56965	1	1	1	sp|P56965|DDAH1_BOVIN N(G),N(G)-dimethylarginine dimethylaminohydrolase 1 OS=Bos taurus OX=9913 GN=DDAH1 PE=1 SV=3	1	1	1	1	0	0	0	0	0	1	0	0	0	0	0	1	0	0	0	0	0	1	2.5	2.5	2.5	31.289	285	285	4		1	1	-2						By MS/MS	0
P63258;P60712;A0A452DJE4;G8JKX4;Q5E9B5;Q3ZC07;P68138;P62739;A0A3Q1M558;A0A3Q1NKP5	P63258	ACTG1 ACTG	Cytosolic	0	P63258;P60712;A0A452DJE4;G8JKX4;Q5E9B5;Q3ZC07;P68138;P62739;A0A3Q1M558	5;5;3;3;3;3;3;3;3;2	5;5;3;3;3;3;3;3;3;2	5;5;3;3;3;3;3;3;3;2	sp|P63258|ACTG_BOVIN Actin, cytoplasmic 2 OS=Bos taurus OX=9913 GN=ACTG1 PE=1 SV=1;sp|P60712|ACTB_BOVIN Actin, cytoplasmic 1 OS=Bos taurus OX=9913 GN=ACTB PE=1 SV=1;tr|A0A452DJE4|A0A452DJE4_BOVIN Actin, aortic smooth muscle OS=Bos taurus OX=9913 GN=ACTA2 P	10	5	5	5	5	5	4	3	3	1	5	5	4	3	3	1	5	5	4	3	3	1	17.3	17.3	17.3	41.792	375	375;375;340;375;376;377;377;377;392;376	2.11	17	10	0	42.726	By MS/MS	By MS/MS	By MS/MS	By MS/MS	By MS/MS	By MS/MS	17.3
P62248	P62248	MYDGF	Cytosolic	0	P62248	1	1	1	sp|P62248|MYDGF_BOVIN Myeloid-derived growth factor OS=Bos taurus OX=9913 GN=MYDGF PE=2 SV=1	1	1	1	1	0	0	0	1	1	0	0	0	0	1	1	0	0	0	0	1	1	0	8.6	8.6	8.6	19.03	174	174	4		2	0.009901	6.1408				By MS/MS	By MS/MS		0
P63103	P63103	YWHAZ	Nuclear	0	P63103	1	1	1	sp|P63103|1433Z_BOVIN 14-3-3 protein zeta/delta OS=Bos taurus OX=9913 GN=YWHAZ PE=1 SV=1	1	1	1	1	1	1	1	1	1	1	1	1	1	1	1	1	1	1	1	1	1	1	5.7	5.7	5.7	27.745	245	245	2.5	3	3	0	15.109	By MS/MS	By MS/MS	By MS/MS	By matching	By MS/MS	By MS/MS	5.7
P79122	P79122	PNN	Nuclear	0	P79122	1	1	1	sp|P79122|PININ_BOVIN Pinin OS=Bos taurus OX=9913 GN=PNN PE=2 SV=3	1	1	1	1	1	1	1	0	0	0	1	1	1	0	0	0	1	1	1	0	0	0	1.6	1.6	1.6	79.49	703	703	1	3		1	-2	By MS/MS	By MS/MS	By MS/MS				1.6
P79345	P79345	NPC2	Cytosolic	0	P79345	2	2	2	sp|P79345|NPC2_BOVIN NPC intracellular cholesterol transporter 2 OS=Bos taurus OX=9913 GN=NPC2 PE=1 SV=1	1	2	2	2	1	1	2	1	1	0	1	1	2	1	1	0	1	1	2	1	1	0	18.1	18.1	18.1	16.64	149	149	2	4	2	0	15.794	By MS/MS	By MS/MS	By MS/MS	By MS/MS	By MS/MS		9.4
P80513	P80513	MANF ARMET ARP	Cytosolic	0	P80513	2	2	2	sp|P80513|MANF_BOVIN Mesencephalic astrocyte-derived neurotrophic factor OS=Bos taurus OX=9913 GN=MANF PE=1 SV=2	1	2	2	2	2	2	2	1	1	0	2	2	2	1	1	0	2	2	2	1	1	0	7.3	7.3	7.3	20.356	179	179	1.75	6	2	0	15.09	By MS/MS	By MS/MS	By MS/MS	By MS/MS	By MS/MS		7.3
P80724	P80724	BASP1 NAP22	Cytosolic	0	P80724	4	4	4	sp|P80724|BASP1_BOVIN Brain acid soluble protein 1 OS=Bos taurus OX=9913 GN=BASP1 PE=1 SV=3	1	4	4	4	4	4	3	3	2	0	4	4	3	3	2	0	4	4	3	3	2	0	19.8	19.8	19.8	23.01	227	227	1.94	11	5	0	28.348	By MS/MS	By MS/MS	By MS/MS	By MS/MS	By MS/MS		19.8
P81287;A0A3Q1MU33;F6QVC9	P81287	ANXA5 ANX5	Cytosolic	0	P81287;A0A3Q1MU33;F6QVC9	9;8;8	9;8;8	9;8;8	sp|P81287|ANXA5_BOVIN Annexin A5 OS=Bos taurus OX=9913 GN=ANXA5 PE=1 SV=3;tr|A0A3Q1MU33|A0A3Q1MU33_BOVIN Annexin OS=Bos taurus OX=9913 GN=ANXA5 PE=1 SV=1;tr|F6QVC9|F6QVC9_BOVIN Annexin OS=Bos taurus OX=9913 GN=ANXA5 PE=1 SV=1	3	9	9	9	8	9	2	4	3	1	8	9	2	4	3	1	8	9	2	4	3	1	35.2	35.2	35.2	36.088	321	321;319;321	1.8	22	8	0	81.985	By MS/MS	By MS/MS	By MS/MS	By MS/MS	By MS/MS	By MS/MS	32.4
Q05204	Q05204	LAMP1	Membrane	0	Q05204	5	5	5	sp|Q05204|LAMP1_BOVIN Lysosome-associated membrane glycoprotein 1 OS=Bos taurus OX=9913 GN=LAMP1 PE=1 SV=2	1	5	5	5	4	4	2	2	2	0	4	4	2	2	2	0	4	4	2	2	2	0	11.7	11.7	11.7	44.152	409	409	1.86	10	4	0	29.612	By MS/MS	By MS/MS	By MS/MS	By MS/MS	By MS/MS		9.3
Q05B46	Q05B46	KRTAP11-1	Cytosolic	0	Q05B46	1	1	1	tr|Q05B46|Q05B46_BOVIN Keratin associated protein 11-1 OS=Bos taurus OX=9913 GN=KRTAP11-1 PE=2 SV=1	1	1	1	1	0	0	0	0	0	1	0	0	0	0	0	1	0	0	0	0	0	1	6.9	6.9	6.9	16.886	159	159	4		1	0	20.858						By MS/MS	0
Q08DV2	Q08DV2	GNPNAT1	Membrane	0	Q08DV2	1	1	1	tr|Q08DV2|Q08DV2_BOVIN Glucosamine 6-phosphate N-acetyltransferase OS=Bos taurus OX=9913 GN=GNPNAT1 PE=2 SV=1	1	1	1	1	0	1	0	0	0	0	0	1	0	0	0	0	0	1	0	0	0	0	9.8	9.8	9.8	20.776	184	184	1	1		0	8.6806		By MS/MS					0
Q08E52	Q08E52	PAK1	Cytoskeletal	0	Q08E52	1	1	1	sp|Q08E52|PAK1_BOVIN Serine/threonine-protein kinase PAK 1 OS=Bos taurus OX=9913 GN=PAK1 PE=1 SV=1	1	1	1	1	0	0	1	0	0	0	0	0	1	0	0	0	0	0	1	0	0	0	2.2	2.2	2.2	60.545	544	544	1	1		1	-2			By MS/MS				0
Q0VC25	Q0VC25	HMCES C22H3ORF37	Cytosolic	0	Q0VC25	1	1	1	tr|Q0VC25|Q0VC25_BOVIN Abasic site processing protein HMCES OS=Bos taurus OX=9913 GN=HMCES PE=2 SV=1	1	1	1	1	0	0	0	0	0	1	0	0	0	0	0	1	0	0	0	0	0	1	2.5	2.5	2.5	40.581	354	354	4		1	0.0053908	6.3128						By MS/MS	0
Q0VC36;A0A3Q1LR49	Q0VC36	SFN	Nuclear	0	Q0VC36	3;1	3;1	3;1	sp|Q0VC36|1433S_BOVIN 14-3-3 protein sigma OS=Bos taurus OX=9913 GN=SFN PE=2 SV=1	2	3	3	3	0	0	0	1	1	2	0	0	0	1	1	2	0	0	0	1	1	2	8.5	8.5	8.5	27.849	248	248;85	4		4	0	19.412				By MS/MS	By MS/MS	By MS/MS	0
Q0VCU3	Q0VCU3	CTSF	Matrisome Associated	ECM Regulators	Q0VCU3	2	2	2	tr|Q0VCU3|Q0VCU3_BOVIN Cathepsin F OS=Bos taurus OX=9913 GN=CTSF PE=2 SV=1	1	2	2	2	2	2	2	1	1	0	2	2	2	1	1	0	2	2	2	1	1	0	5.4	5.4	5.4	50.893	460	460	1.75	6	2	0	17.373	By MS/MS	By MS/MS	By MS/MS	By MS/MS	By MS/MS		5.4
Q0VCW0	Q0VCW0	GRHL1	Nuclear	0	Q0VCW0	1	1	1	tr|Q0VCW0|Q0VCW0_BOVIN Grainyhead like transcription factor 1 OS=Bos taurus OX=9913 GN=GRHL1 PE=2 SV=1	1	1	1	1	0	0	1	0	0	0	0	0	1	0	0	0	0	0	1	0	0	0	2.1	2.1	2.1	71.024	629	629	1	1		1	-2			By MS/MS				0
Q0VCX2	Q0VCX2	HSPA5 GRP78	Cytosolic	0	Q0VCX2	22	22	22	sp|Q0VCX2|BIP_BOVIN Endoplasmic reticulum chaperone BiP OS=Bos taurus OX=9913 GN=HSPA5 PE=2 SV=1	1	22	22	22	16	17	13	16	18	7	16	17	13	16	18	7	16	17	13	16	18	7	36.2	36.2	36.2	72.399	655	655	2.34	61	49	0	323.31	By MS/MS	By MS/MS	By MS/MS	By MS/MS	By MS/MS	By MS/MS	28.5
Q0VCY3	Q0VCY3	SURF6	Nuclear	0	Q0VCY3	1	1	1	sp|Q0VCY3|SURF6_BOVIN Surfeit locus protein 6 OS=Bos taurus OX=9913 GN=SURF6 PE=2 SV=1	1	1	1	1	0	0	0	0	0	1	0	0	0	0	0	1	0	0	0	0	0	1	3.4	3.4	3.4	40.641	353	353	4		3	1	-2						By MS/MS	0
Q0VD04;A0A3Q1MSS8;A0A3Q1M0W3	Q0VD04	KRT85	Cytoskeletal	0	Q0VD04;A0A3Q1MSS8	25;21;9	3;2;0	3;2;0	tr|Q0VD04|Q0VD04_BOVIN Keratin 85 OS=Bos taurus OX=9913 GN=KRT85 PE=2 SV=1;tr|A0A3Q1MSS8|A0A3Q1MSS8_BOVIN Keratin 85 OS=Bos taurus OX=9913 GN=KRT85 PE=3 SV=1	3	25	3	3	0	0	0	2	1	25	0	0	0	1	0	3	0	0	0	1	0	3	32.9	6.5	6.5	55.895	507	507;485;480	4		4	0	43.512				By matching	By matching	By MS/MS	0
Q148H4;A0A3Q1ML39	Q148H4	KRT81	Cytoskeletal	0	Q148H4;A0A3Q1ML39	32;29	5;5	1;1	sp|Q148H4|KRT81_BOVIN Keratin, type II cuticular Hb1 OS=Bos taurus OX=9913 GN=KRT81 PE=2 SV=1;tr|A0A3Q1ML39|A0A3Q1ML39_BOVIN Keratin, type II cuticular Hb1 OS=Bos taurus OX=9913 GN=KRT81 PE=3 SV=1	2	32	5	1	0	0	0	1	1	32	0	0	0	0	0	5	0	0	0	0	0	1	43	11.2	2.8	54.612	500	500;497	4		8	0	43.681				By matching	By matching	By MS/MS	0
Q148J7	Q148J7	BAG1 LOC781741	Cytosolic	0	Q148J7	1	1	1	tr|Q148J7|Q148J7_BOVIN BAG family molecular chaperone regulator 1 OS=Bos taurus OX=9913 GN=BAG1 PE=2 SV=1	1	1	1	1	1	1	1	0	0	0	1	1	1	0	0	0	1	1	1	0	0	0	4.2	4.2	4.2	26.35	237	237	1	3		0.01005	6.152	By MS/MS	By MS/MS	By MS/MS				4.2
Q17QE0	Q17QE0	FAM241A	Membrane	0	Q17QE0	1	1	1	sp|Q17QE0|F241A_BOVIN Uncharacterized protein FAM241A OS=Bos taurus OX=9913 GN=FAM241A PE=2 SV=1	1	1	1	1	1	1	1	0	0	0	1	1	1	0	0	0	1	1	1	0	0	0	11.6	11.6	11.6	15.07	138	138	1	3		1	-2	By matching	By MS/MS	By matching				11.6
Q17QG2	Q17QG2	NUDC	Cytoskeletal	0	Q17QG2	3	3	3	sp|Q17QG2|NUDC_BOVIN Nuclear migration protein nudC OS=Bos taurus OX=9913 GN=NUDC PE=2 SV=1	1	3	3	3	3	3	3	3	3	1	3	3	3	3	3	1	3	3	3	3	3	1	11.4	11.4	11.4	38.242	332	332	2.31	9	7	0	22.827	By MS/MS	By MS/MS	By MS/MS	By MS/MS	By MS/MS	By MS/MS	11.4
Q17QM8	Q17QM8	DUSP14	Nuclear	0	Q17QM8	1	1	1	sp|Q17QM8|DUS14_BOVIN Dual specificity protein phosphatase 14 OS=Bos taurus OX=9913 GN=DUSP14 PE=2 SV=1	1	1	1	1	0	0	0	0	0	1	0	0	0	0	0	1	0	0	0	0	0	1	7.6	7.6	7.6	22.237	198	198	4		2	0.0052356	6.2409						By MS/MS	0
Q1LZ72	Q1LZ72	CNPY2	Cytosolic	0	Q1LZ72	1	1	1	tr|Q1LZ72|Q1LZ72_BOVIN Canopy 2 homolog (Zebrafish) OS=Bos taurus OX=9913 GN=CNPY2 PE=2 SV=1	1	1	1	1	1	1	1	1	1	0	1	1	1	1	1	0	1	1	1	1	1	0	5.5	5.5	5.5	20.668	182	182	2.2	3	2	0	13.088	By MS/MS	By MS/MS	By MS/MS	By MS/MS	By MS/MS		5.5
Q27975;Q27965	Q27975	HSPA1A HSP70-1	Cytosolic	0	Q27975;Q27965	5;5	4;4	2;2	sp|Q27975|HS71A_BOVIN Heat shock 70 kDa protein 1A OS=Bos taurus OX=9913 GN=HSPA1A PE=1 SV=2;sp|Q27965|HS71B_BOVIN Heat shock 70 kDa protein 1B OS=Bos taurus OX=9913 GN=HSPA1B PE=2 SV=1	2	5	4	2	4	4	3	3	3	0	3	3	2	2	2	0	2	2	1	1	1	0	8	6.9	4.4	70.258	641	641;641	2	8	4	0	26.814	By MS/MS	By MS/MS	By MS/MS	By MS/MS	By MS/MS		6.9
Q29RH9	Q29RH9	TMEM109	Nuclear	0	Q29RH9	1	1	1	tr|Q29RH9|Q29RH9_BOVIN Transmembrane protein 109 OS=Bos taurus OX=9913 GN=TMEM109 PE=1 SV=1	1	1	1	1	0	1	0	0	0	0	0	1	0	0	0	0	0	1	0	0	0	0	6.2	6.2	6.2	26.225	243	243	1	1		0	7.4505		By MS/MS					0
Q2HJ35	Q2HJ35	CHMP4C	Membrane	0	Q2HJ35	1	1	1	tr|Q2HJ35|Q2HJ35_BOVIN Charged multivesicular body protein 4C OS=Bos taurus OX=9913 GN=CHMP4C PE=2 SV=1	1	1	1	1	0	0	1	0	0	0	0	0	1	0	0	0	0	0	1	0	0	0	5.5	5.5	5.5	26.434	236	236	1	1		1	-2			By MS/MS				0
Q2HJ49	Q2HJ49	MSN	Cytoskeletal	0	Q2HJ49	3	3	3	sp|Q2HJ49|MOES_BOVIN Moesin OS=Bos taurus OX=9913 GN=MSN PE=2 SV=3	1	3	3	3	1	1	1	2	1	0	1	1	1	2	1	0	1	1	1	2	1	0	4.9	4.9	4.9	67.974	577	577	2.5	3	3	0	17.568	By MS/MS	By MS/MS	By matching	By MS/MS	By MS/MS		1.7
Q2HJ57	Q2HJ57	COTL1	Cytoskeletal	0	Q2HJ57	4	4	4	sp|Q2HJ57|COTL1_BOVIN Coactosin-like protein OS=Bos taurus OX=9913 GN=COTL1 PE=2 SV=3	1	4	4	4	1	1	0	3	2	0	1	1	0	3	2	0	1	1	0	3	2	0	23.2	23.2	23.2	16.01	142	142	3.14	2	5	0	23.458	By MS/MS	By MS/MS		By MS/MS	By MS/MS		6.3
Q2KJH6	Q2KJH6	SERPINH1	Matrisome Associated	ECM Regulators	Q2KJH6	2	2	2	sp|Q2KJH6|SERPH_BOVIN Serpin H1 OS=Bos taurus OX=9913 GN=SERPINH1 PE=2 SV=1	1	2	2	2	1	2	1	0	0	0	1	2	1	0	0	0	1	2	1	0	0	0	6.5	6.5	6.5	46.506	418	418	1	4		0	15.523	By MS/MS	By MS/MS	By MS/MS				2.9
Q2KJJ8	Q2KJJ8	PLD3	Membrane	0	Q2KJJ8	3	3	3	sp|Q2KJJ8|PLD3_BOVIN 5-3 exonuclease PLD3 OS=Bos taurus OX=9913 GN=PLD3 PE=2 SV=1	1	3	3	3	2	2	2	3	3	0	2	2	2	3	3	0	2	2	2	3	3	0	6.1	6.1	6.1	54.619	490	490	2.2	9	6	0	23.296	By MS/MS	By MS/MS	By MS/MS	By MS/MS	By MS/MS		4.1
Q2T9V8	Q2T9V8	DTD1 HARS2	Cytosolic	0	Q2T9V8	1	1	1	sp|Q2T9V8|DTD1_BOVIN D-aminoacyl-tRNA deacylase 1 OS=Bos taurus OX=9913 GN=DTD1 PE=2 SV=1	1	1	1	1	1	1	1	1	1	0	1	1	1	1	1	0	1	1	1	1	1	0	7.2	7.2	7.2	23.232	209	209	2	4	2	0	8.7946	By MS/MS	By MS/MS	By MS/MS	By MS/MS	By MS/MS		7.2
Q2TBS3	Q2TBS3	SCP2D1	Cytosolic	0	Q2TBS3	1	1	1	sp|Q2TBS3|SCP2D_BOVIN SCP2 sterol-binding domain-containing protein 1 OS=Bos taurus OX=9913 GN=SCP2D1 PE=2 SV=1	1	1	1	1	0	0	0	1	0	0	0	0	0	1	0	0	0	0	0	1	0	0	6.4	6.4	6.4	17.488	156	156	4		1	1	-2				By MS/MS			0
Q32LC7	Q32LC7	G3BP1 G3BP	Cytosolic	0	Q32LC7	1	1	1	sp|Q32LC7|G3BP1_BOVIN Ras GTPase-activating protein-binding protein 1 OS=Bos taurus OX=9913 GN=G3BP1 PE=2 SV=1	1	1	1	1	1	1	0	0	0	0	1	1	0	0	0	0	1	1	0	0	0	0	3.2	3.2	3.2	52.121	465	465	1	2		0.0051813	6.2205	By MS/MS	By matching					3.2
Q32LE4	Q32LE4	GGCT	Cytosolic	0	Q32LE4	7	7	7	sp|Q32LE4|GGCT_BOVIN Gamma-glutamylcyclotransferase OS=Bos taurus OX=9913 GN=GGCT PE=2 SV=1	1	7	7	7	5	5	3	5	5	0	5	5	3	5	5	0	5	5	3	5	5	0	31.4	31.4	31.4	21.177	188	188	2.44	13	12	0	44.121	By MS/MS	By MS/MS	By MS/MS	By MS/MS	By MS/MS		25.5
Q3SZC4	Q3SZC4	NSFL1C	Cytoskeletal	0	Q3SZC4	2	2	2	sp|Q3SZC4|NSF1C_BOVIN NSFL1 cofactor p47 OS=Bos taurus OX=9913 GN=NSFL1C PE=2 SV=1	1	2	2	2	1	2	0	0	0	0	1	2	0	0	0	0	1	2	0	0	0	0	7.3	7.3	7.3	40.653	370	370	1	4		0	11.786	By MS/MS	By MS/MS					3.2
Q3SZV7;A0A452DI25;CON__Q3SZV7;A0A3Q1N2E0	Q3SZV7	HPX	Matrisome Associated	ECM-affiliated Proteins	Q3SZV7;A0A452DI25;CON__Q3SZV7	3;2;2;1	3;2;2;1	3;2;2;1	sp|Q3SZV7|HEMO_BOVIN Hemopexin OS=Bos taurus OX=9913 GN=HPX PE=2 SV=1;tr|A0A452DI25|A0A452DI25_BOVIN Hemopexin OS=Bos taurus OX=9913 GN=HPX PE=4 SV=1;	4	3	3	3	3	3	1	2	2	1	3	3	1	2	2	1	3	3	1	2	2	1	9.2	9.2	9.2	52.209	459	459;459;460;425	2.25	7	5	0	81.72	By MS/MS	By MS/MS	By MS/MS	By MS/MS	By MS/MS	By MS/MS	9.2
Q3T0Q4	Q3T0Q4	NME2	Cytoskeletal	0	Q3T0Q4	3	1	1	sp|Q3T0Q4|NDKB_BOVIN Nucleoside diphosphate kinase B OS=Bos taurus OX=9913 GN=NME2 PE=1 SV=1	1	3	1	1	2	2	3	2	2	0	0	0	1	0	0	0	0	0	1	0	0	0	25.7	6.6	6.6	17.316	152	152	1	1		0.01	6.1498	By matching	By matching	By MS/MS	By matching	By matching		19.1
Q3T114;A0A3Q1MM98	Q3T114	RIDA	Nuclear	0	Q3T114;A0A3Q1MM98	5;4	5;4	5;4	sp|Q3T114|RIDA_BOVIN 2-iminobutanoate/2-iminopropanoate deaminase OS=Bos taurus OX=9913 GN=RIDA PE=2 SV=3;tr|A0A3Q1MM98|A0A3Q1MM98_BOVIN 2-iminobutanoate/2-iminopropanoate deaminase OS=Bos taurus OX=9913 PE=3 SV=1	2	5	5	5	4	5	3	3	3	2	4	5	3	3	3	2	4	5	3	3	3	2	39.4	39.4	39.4	14.272	137	137;137	2.14	13	8	0	55.17	By MS/MS	By MS/MS	By MS/MS	By MS/MS	By MS/MS	By MS/MS	31.4
Q58CQ9;A0A140T891	Q58CQ9	VNN1	Membrane	0	Q58CQ9;A0A140T891	2;1	2;1	2;1	sp|Q58CQ9|VNN1_BOVIN Pantetheinase OS=Bos taurus OX=9913 GN=VNN1 PE=1 SV=1;tr|A0A140T891|A0A140T891_BOVIN Pantetheinase OS=Bos taurus OX=9913 GN=VNN1 PE=3 SV=1	2	2	2	2	2	2	2	2	2	1	2	2	2	2	2	1	2	2	2	2	2	1	5.1	5.1	5.1	56.946	510	510;510	2.25	7	5	0	13.897	By MS/MS	By MS/MS	By MS/MS	By MS/MS	By MS/MS	By matching	5.1
Q58CS5	Q58CS5	FGD3	Cytoskeletal	0	Q58CS5	1	1	1	tr|Q58CS5|Q58CS5_BOVIN FGD1 family, member 3 OS=Bos taurus OX=9913 GN=FGD3 PE=2 SV=1	1	1	1	1	0	0	1	0	0	0	0	0	1	0	0	0	0	0	1	0	0	0	1.6	1.6	1.6	80.673	740	740	1	2		0.003003	6.5703			By MS/MS				0
Q58DU7	Q58DU7	SH3BGRL	Cytosolic	0	Q58DU7	3	3	3	sp|Q58DU7|SH3L1_BOVIN SH3 domain-binding glutamic acid-rich-like protein OS=Bos taurus OX=9913 GN=SH3BGRL PE=3 SV=1	1	3	3	3	2	2	0	2	2	0	2	2	0	2	2	0	2	2	0	2	2	0	29.8	29.8	29.8	12.776	114	114	2.5	4	4	0	23.011	By MS/MS	By MS/MS		By MS/MS	By MS/MS		24.6
Q5BIR5	Q5BIR5	SERPINB8	Matrisome Associated	ECM Regulators	Q5BIR5	4	2	2	sp|Q5BIR5|SPB8_BOVIN Serpin B8 OS=Bos taurus OX=9913 GN=SERPINB8 PE=2 SV=1	1	4	2	2	2	2	2	2	2	1	2	1	2	1	1	1	2	1	2	1	1	1	12.3	7.2	7.2	42.172	374	374	2.12	5	3	0	14.921	By MS/MS	By MS/MS	By MS/MS	By MS/MS	By MS/MS	By matching	7.2
Q5E946	Q5E946	PARK7	Nuclear	0	Q5E946	3	3	3	sp|Q5E946|PARK7_BOVIN Parkinson disease protein 7 homolog OS=Bos taurus OX=9913 GN=PARK7 PE=2 SV=1	1	3	3	3	3	3	2	3	3	1	3	3	2	3	3	1	3	3	2	3	3	1	25.9	25.9	25.9	20.035	189	189	2.5	8	8	0	78.177	By MS/MS	By MS/MS	By MS/MS	By MS/MS	By MS/MS	By matching	25.9
Q5E947;A0A3Q1MIR5	Q5E947	PRDX1	Nuclear	0	Q5E947	3;1	3;1	3;1	sp|Q5E947|PRDX1_BOVIN Peroxiredoxin-1 OS=Bos taurus OX=9913 GN=PRDX1 PE=2 SV=1	2	3	3	3	3	3	2	1	1	1	3	3	2	1	1	1	3	3	2	1	1	1	14.6	14.6	14.6	22.209	199	199;92	1.75	9	3	0	18.138	By MS/MS	By MS/MS	By MS/MS	By MS/MS	By MS/MS	By matching	14.6
Q5E951	Q5E951	TBCB CKAP1	Cytosolic	0	Q5E951	1	1	1	sp|Q5E951|TBCB_BOVIN Tubulin-folding cofactor B OS=Bos taurus OX=9913 GN=TBCB PE=2 SV=1	1	1	1	1	1	1	1	1	1	0	1	1	1	1	1	0	1	1	1	1	1	0	6.6	6.6	6.6	27.517	244	244	2.2	3	2	0	7.2578	By MS/MS	By MS/MS	By MS/MS	By matching	By MS/MS		6.6
Q5E9F5	Q5E9F5	TAGLN2	Cytosolic	0	Q5E9F5	2	2	2	sp|Q5E9F5|TAGL2_BOVIN Transgelin-2 OS=Bos taurus OX=9913 GN=TAGLN2 PE=2 SV=3	1	2	2	2	2	2	0	0	0	0	2	2	0	0	0	0	2	2	0	0	0	0	8.5	8.5	8.5	22.426	199	199	1	4		0	11.774	By MS/MS	By MS/MS					8.5
Q8WMP9	Q8WMP9	PLA2G15 LYPLA3	Cytosolic	0	Q8WMP9	2	2	2	sp|Q8WMP9|PAG15_BOVIN Phospholipase A2 group XV OS=Bos taurus OX=9913 GN=PLA2G15 PE=1 SV=1	1	2	2	2	2	2	1	0	0	0	2	2	1	0	0	0	2	2	1	0	0	0	7.4	7.4	7.4	46.061	407	407	1	5		0	18.522	By MS/MS	By MS/MS	By MS/MS				7.4
Q95L54;A0A3Q1MTA5	Q95L54	ANXA8	Matrisome Associated	ECM-affiliated Proteins	Q95L54;A0A3Q1MTA5	3;2	3;2	3;2	sp|Q95L54|ANXA8_BOVIN Annexin A8 OS=Bos taurus OX=9913 GN=ANXA8 PE=2 SV=1;tr|A0A3Q1MTA5|A0A3Q1MTA5_BOVIN Annexin OS=Bos taurus OX=9913 GN=ANXA8L1 PE=1 SV=1	2	3	3	3	3	2	2	1	1	0	3	2	2	1	1	0	3	2	2	1	1	0	11.3	11.3	11.3	36.787	327	327;328	1.67	7	2	0	19.844	By MS/MS	By MS/MS	By matching	By MS/MS	By MS/MS		11.3
Q95M18	Q95M18	HSP90B1 GRP94 TRA1	Cytosolic	0	Q95M18	4	4	3	sp|Q95M18|ENPL_BOVIN Endoplasmin OS=Bos taurus OX=9913 GN=HSP90B1 PE=2 SV=1	1	4	4	3	3	3	1	1	1	0	3	3	1	1	1	0	2	2	0	1	1	0	7.2	7.2	5.7	92.426	804	804	1.67	7	2	0	23.715	By MS/MS	By MS/MS	By matching	By MS/MS	By MS/MS		5.6
Q9N0V4;F6Q751;E1BH17;A0A3Q1LFR2;A0A3Q1LY34;A0A3Q1MQV0;A0A3Q1NG91;A0A3Q1MJD4	Q9N0V4	GSTM1 GSTM	Cytosolic	0	Q9N0V4;F6Q751;E1BH17;A0A3Q1LFR2;A0A3Q1LY34;A0A3Q1MQV0;A0A3Q1NG91	10;9;9;9;7;6;5;2	10;9;9;9;7;6;5;2	4;4;4;4;2;2;2;0	sp|Q9N0V4|GSTM1_BOVIN Glutathione S-transferase Mu 1 OS=Bos taurus OX=9913 GN=GSTM1 PE=1 SV=3;tr|F6Q751|F6Q751_BOVIN Glutathione transferase OS=Bos taurus OX=9913 GN=GSTM1 PE=3 SV=2;tr|E1BH17|E1BH17_BOVIN Glutathione transferase OS=Bos taurus OX=9913 GN=GS	8	10	10	4	9	8	7	7	7	2	9	8	7	7	7	2	4	4	4	4	4	1	44.5	44.5	21.6	25.635	218	218;218;218;218;266;218;149;224	1.95	39	18	0	240.78	By MS/MS	By MS/MS	By MS/MS	By MS/MS	By MS/MS	By MS/MS	41.3
REV__A0JNG1;REV__A0A3Q1M5N6;REV__A0A3Q1N5W1;REV__A0A3Q1N3B3;REV__A0A3Q1MSH9;REV__A0A3Q1M4R7	REV__A0JNG1	Cytosolic	Cytosolic	0	REV__A0JNG1;REV__A0A3Q1M5N6;REV__A0A3Q1N5W1;REV__A0A3Q1N3B3;REV__A0A3Q1MSH9;REV__A0A3Q1M4R7	1;1;1;1;1;1	1;1;1;1;1;1	1;1;1;1;1;1	tr|A0JNG1|A0JNG1_BOVIN Cordon-bleu homolog (Mouse) OS=Bos taurus OX=9913 GN=COBL PE=2 SV=1;tr|A0A3Q1M5N6|A0A3Q1M5N6_BOVIN Uncharacterized protein OS=Bos taurus OX=9913 GN=COBL PE=4 SV=1;tr|A0A3Q1N5W1|A0A3Q1N5W1_BOVIN Uncharacterized protein OS=Bos taurus O	6	1	1	1	0	0	0	0	0	1	0	0	0	0	0	1	0	0	0	0	0	1	0	0	0	43.537	397	397;1232;1247;1251;1281;1308	4		3	0.0030769	6.649						By MS/MS	0
REV__A7E3R1	REV__A7E3R1	Cytosolic	Cytosolic	0	REV__A7E3R1	1	1	1	tr|A7E3R1|A7E3R1_BOVIN Transmembrane protein 19 OS=Bos taurus OX=9913 GN=TMEM19 PE=2 SV=1	1	1	1	1	1	1	0	0	0	0	1	1	0	0	0	0	1	1	0	0	0	0	0	0	0	36.44	336	336	1	2		1	-2	By MS/MS	By MS/MS					0
REV__F1MQI6	REV__F1MQI6	Cytosolic	Cytosolic	0	REV__F1MQI6	1	1	1	tr|F1MQI6|F1MQI6_BOVIN Transient receptor potential cation channel subfamily M member 3 OS=Bos taurus OX=9913 GN=TRPM3 PE=4 SV=3	1	1	1	1	1	0	1	1	0	1	1	0	1	1	0	1	1	0	1	1	0	1	0	0	0	139.68	1211	1211	2.71	3	4	0.0054945	6.3487	By MS/MS		By MS/MS	By MS/MS		By MS/MS	0
REV__F1N0S9	REV__F1N0S9	Cytosolic	Cytosolic	0	REV__F1N0S9	1	1	1	tr|F1N0S9|F1N0S9_BOVIN Family with sequence similarity 98 member A OS=Bos taurus OX=9913 GN=FAM98A PE=3 SV=3	1	1	1	1	0	0	0	1	0	1	0	0	0	1	0	1	0	0	0	1	0	1	0	0	0	55.329	517	517	4		2	1	-2				By matching		By MS/MS	0
REV__F1N693	REV__F1N693	Cytosolic	Cytosolic	0	REV__F1N693	1	1	1	tr|F1N693|F1N693_BOVIN Homeobox protein cut-like OS=Bos taurus OX=9913 GN=CUX1 PE=3 SV=3	1	1	1	1	0	0	1	1	1	0	0	0	1	1	1	0	0	0	1	1	1	0	0	0	0	167.27	1534	1534	3.4	1	4	0.010152	6.1629			By MS/MS	By MS/MS	By MS/MS		0
REV__Q2KJ46	REV__Q2KJ46	Cytosolic	Cytosolic	0	REV__Q2KJ46	1	1	1	sp|Q2KJ46|PSMD3_BOVIN 26S proteasome non-ATPase regulatory subunit 3 OS=Bos taurus OX=9913 GN=PSMD3 PE=2 SV=1	1	1	1	1	1	1	1	1	1	0	1	1	1	1	1	0	1	1	1	1	1	0	0	0	0	60.956	534	534	1.75	9	3	0.0076142	6.1643	By MS/MS	By MS/MS	By MS/MS	By matching	By MS/MS		0
REV__Q2KJD7	REV__Q2KJD7	Cytosolic	Cytosolic	0	REV__Q2KJD7	1	1	1	sp|Q2KJD7|UBCP1_BOVIN Ubiquitin-like domain-containing CTD phosphatase 1 OS=Bos taurus OX=9913 GN=UBLCP1 PE=2 SV=1	1	1	1	1	0	0	0	1	1	0	0	0	0	1	1	0	0	0	0	1	1	0	0	0	0	36.804	318	318	4		3	1	-2				By MS/MS	By MS/MS		0
[truncated: 52 more columns]

## Sheet: Filtered Proteins
						RAW INTENSITY									Identification Type
						Aha			Met						Aha			Met
Uniprot Protein IDs	Lead Gene Name	Cellular Compartment	Matrisome Classification	Mol. weight [kDa]	Sequence length	Biological Rep. 1	Biological Rep. 2	Biological Rep. 3	Biological Rep. 1	Biological Rep. 2	Biological Rep. 3	Number of proteins	Q-value	Score	Biological Rep. 1	Biological Rep. 2	Biological Rep. 3	Biological Rep. 1	Biological Rep. 2	Biological Rep. 3
A0A3Q1MDK7;A4IFU5;A0A096LNF2;A0A3Q1MF62;A0A3Q1N7K2;F1MRN2;P0C0S9;F2Z4J1;E1BH22;A0A0A0MP90;F2Z4G5;Q3ZBX9;A1A4R1;A0A3Q1N0B0;A0A0A0MP93;F1MLQ1;Q32LA7;P0C0S4;F2Z4I6;A0A3Q1M178;A0A3Q1M0K4	H2AC10	Nuclear		15.519	145	23827000	61433000	8969600	30590000	21796000		21	0	36.891	By MS/MS	By MS/MS	By MS/MS	By MS/MS	By MS/MS
A0A3Q1LXP4;P17690;CON__P17690;A0A140T843	APOH	Cytosolic		37.438	339	132110000	97326000	38372000	74431000	54647000	6221000	4	0	40.173	By MS/MS	By MS/MS	By MS/MS	By MS/MS	By MS/MS	By MS/MS
Q58DC0;A0A140T860;A0A3Q1MPJ7	CPPED1	Cytosolic		35.409	313	1262300	1390600		1021300	1762800		3	0	15.076	By MS/MS	By MS/MS		By MS/MS	By MS/MS
A0A140T897;P02769;CON__P02769;A0A3Q1LNN7	ALB	Cytosolic		69.323	607	28510000000	24662000000	18727000000	14486000000	19755000000	12750000000	4	0	323.31	By MS/MS	By MS/MS	By MS/MS	By MS/MS	By MS/MS	By MS/MS
F1MNV5;P01045;CON__P01045-1;P01044;CON__Q2KJ62;CON__P01044-1;A0A140T8C8	KNG1	Matrisome Associated	ECM Regulators	48.421	436	27770000	18633000	1931500	6971300	13532000	85774	7	0	43.063	By MS/MS	By MS/MS	By MS/MS	By MS/MS	By MS/MS	By matching
P53712;A0A452DIS2;A0A140T8D2	ITGB1	Membrane		88.093	798	2957700	1817500	81820	2073300	2924600		3	0	33.824	By MS/MS	By MS/MS	By matching	By MS/MS	By MS/MS
A0A3Q1LHT7;F1MDC1	RRBP1	Membrane		166.77	1551	7331600	4808400	4072800	4827800	7338900		2	0	33.676	By MS/MS	By MS/MS	By MS/MS	By MS/MS	By MS/MS
A0A3Q1M299;A0A3Q1M849;F1MPE1;A0A3Q1LTK9;A0A3Q1M6A2;A0A3Q1N1N6;A0A3Q1LI93	CD109	Matrisome Associated	ECM Regulators	155.52	1391	6464600	4874700	1902200	4765800	5274600		7	0	30.907	By MS/MS	By MS/MS	By MS/MS	By MS/MS	By MS/MS
A0A3Q1LXK9;A0A3Q1MQG2;A0A3Q1M2E4;A0A3Q1M6Q7;A0A3Q1NIP5;A0A3Q1LJL6;A0A3Q1LVA4;E1BF59;A0A3Q1LXH1;A0A3Q1MRS3	PLEC	Cytoskeletal		513.69	4516	5375800	4895800	2843100	3642500	4937600		10	0	52.524	By MS/MS	By MS/MS	By MS/MS	By MS/MS	By MS/MS
A0A3Q1LLF1;A0A3Q1LKE5;F1MRZ6;A0A3Q1LIW2;A0A3Q1LTF1;A0A3Q1LU83;A0A3Q1NBB0;A0A3Q1MPD2;A0A3Q1M1X4;F1MRZ5	TNC	Core Matrisome	ECM Glycoproteins	231.06	2110	61350000	53527000	16242000	37095000	50450000	648300	10	0	181.71	By MS/MS	By MS/MS	By MS/MS	By MS/MS	By MS/MS	By matching
A0A3Q1LKV8;F1MLV3;A0A3Q1ME81	TXNL1	Nuclear		28.229	254	4733000	5101500	773260	3766700	2131200	88419	3	0	15.422	By MS/MS	By MS/MS	By MS/MS	By MS/MS	By MS/MS	By matching
A0A3Q1M057;A0A3Q1LMA3;F1N169	FLNA	Cytoskeletal		270.48	2548	27260000	26694000	4830700	13110000	23484000		3	0	33.192	By MS/MS	By MS/MS	By MS/MS	By MS/MS	By MS/MS
A6QLL8;A0A3Q1LMG1	ALDOA	Cytoskeletal		39.436	364	5240300	7079600	3138500	2084900	2915300		2	0	12.37	By matching	By MS/MS	By MS/MS	By MS/MS	By MS/MS
A0A3Q1M8L6;P19120;A0A3Q1LMS5	HSPA8	Cytoskeletal		66.772	607	69398000	50933000	39078000	30526000	99984000		3	0	99.14	By MS/MS	By MS/MS	By MS/MS	By MS/MS	By MS/MS
A0A3Q1LMV5;P28801;A0A452DHY4	GSTP1	Nuclear		26.745	240	25669000	30411000	3750100	4877700	4775700		3	0	323.31	By MS/MS	By MS/MS	By MS/MS	By MS/MS	By MS/MS
Q1JPB0;A0A3Q1LN63	SERPINB1	Matrisome Associated	ECM Regulators	42.235	377	72650000	43342000	18316000	38736000	49990000	2826000	2	0	91.387	By MS/MS	By MS/MS	By MS/MS	By MS/MS	By MS/MS	By MS/MS
A0A3Q1LND7;Q29RK4;A0A3Q1M2P9;A3KMV2		Cytosolic		36.118	334				2432400	6536200		4	0	11.672				By MS/MS	By MS/MS
A0A3Q1LNE7;Q08E54;A0A3S5ZPG2;A0A3Q1MI56;A0A3Q1MGE4;A0A3Q1MLQ6;A0A3Q1LUG2	APP	Cytoskeletal		78.595	694	1488800	1099800	1187400				7	0	14.984	By MS/MS	By MS/MS	By matching
A0A3Q1LP66;A0A452DHZ3;Q9N2I2;CON__Q9N2I2;A0A3Q1MRW0	SERPINA5	Matrisome Associated	ECM Regulators	41.047	369	2725100	2574500	435810	908760	1015500		5	0	18.73	By MS/MS	By MS/MS	By MS/MS	By MS/MS	By MS/MS
A0A3Q1LPG0		Cytosolic		35.568	320	75223000	48208000	1816000	31790000	21506000	75376	1	0	43.351	By MS/MS	By MS/MS	By MS/MS	By MS/MS	By MS/MS	By matching
A0A3Q1MKX8;Q3MHN5;F1N5M2;CON__Q3MHN5;A0A3Q1LQ02;CON__ENSEMBL:ENSBTAP00000018229	GC	Matrisome Associated	Secreted Factors	52.005	465	6915500	6765700	2003000	1390400	2077100		6	0	12.258	By MS/MS	By MS/MS	By MS/MS	By MS/MS	By MS/MS
A0A3Q1LQ81;A0A3Q1MI22;A0A3Q1NJB1;A0A3Q1LR93;F1N076;CON__ENSEMBL:ENSBTAP00000031900	CP	Cytosolic		115.82	1014	7770300	7216500	1557300	1060800	1547000		6	0	14.717	By MS/MS	By MS/MS	By MS/MS	By MS/MS	By MS/MS
F6PSK5;A0A3Q1MKU4;A0A3Q1LQK2;E1BFL8	IL1RAP	Membrane		60.01	520	1813300	920690	380170	1343400	1884600		4	0	13.309	By MS/MS	By matching	By MS/MS	By MS/MS	By MS/MS
A0A3Q1LRP5;CON__Q3KUS7;P81187	CFB	Cytosolic		81.46	725	78798000	128530000	98684000	92844000	114780000	3047800	3	0	37.499	By MS/MS	By MS/MS	By MS/MS	By MS/MS	By MS/MS	By matching
A0A3Q1LS55;Q5GN72;Q3SZR3;CON__Q3SZR3	ORM1	Matrisome Associated	Secreted Factors	21.44	187	49050000	38124000	28461000	43126000	62278000		4	0	59.789	By MS/MS	By MS/MS	By MS/MS	By MS/MS	By MS/MS
P62157;A0A452DIM7;A0A452DJ55;A0A3Q1M6C6;A0A3Q1LSI9;A0A3Q1MR28;F1MLH6	CALM	Cytoskeletal		16.837	149	14829000	7147500	8697900	3032000	2283900		7	0	19.618	By MS/MS	By MS/MS	By MS/MS	By MS/MS	By MS/MS
A0A3Q1LSN0;F1MYX5	LCP1	Cytoskeletal		70.111	627	7706900	9103600	2906200	329440	353380		2	0	61.14	By MS/MS	By MS/MS	By MS/MS	By MS/MS	By MS/MS
Q2KIV8;A0A3Q1LSN6	GSTM3	Cytosolic		26.85	225	35553000	33513000	21798000	4407400	7399500	238730	2	0	35.535	By MS/MS	By MS/MS	By MS/MS	By MS/MS	By MS/MS	By matching
A0A3Q1MFF3;Q17QK3;A0A3Q1LSW9;A0A3Q1M524	CPQ	Cytosolic		49.276	452	12872000	14092000	2739500	5051200	8344200	2298700	4	0	51.577	By MS/MS	By MS/MS	By MS/MS	By MS/MS	By MS/MS	By MS/MS
A0A3Q1LTB0;Q32LG3	MDH2	Membrane		33.005	312	1354200	2620000	12517000	4489600	3935400	3033200	2	0	31.011	By MS/MS	By MS/MS	By MS/MS	By MS/MS	By MS/MS	By MS/MS
F1MEQ3;A0A3Q1LTZ5;P11179;A0A3Q1MHE5	DLST	Nuclear		47.046	437	9750000	6895100	4206600	4483600	4798900		4	0	18.544	By MS/MS	By MS/MS	By MS/MS	By MS/MS	By MS/MS
A5D7M4;A0A3Q1LU70	YBX2	Nuclear		38.268	360	1625000	1432800		2049700	2802900		2	0	53.507	By MS/MS	By MS/MS		By MS/MS	By MS/MS
A0A3Q1LWX8;A0A3Q1N1Y2;A0A3Q1LUC5;F1MEG3;A0A3Q1MIP0;A0A3Q1N0A0	LAMA1	Core Matrisome	ECM Glycoproteins	304.31	2784	2906800	2721500		2007900	2069700		6	0	20.558	By MS/MS	By MS/MS		By MS/MS	By MS/MS
A0A3Q1LWV8;A0A3Q1LUE9;G3X7I5;G3MZE0;A0A3Q1MWF5		Cytosolic		16.433	156	66164000	60256000	45270000	71627000	99891000	3512200	5	0	106.34	By MS/MS	By MS/MS	By MS/MS	By MS/MS	By MS/MS	By MS/MS
P81947;Q3ZCJ7;A0A452DJ66;Q32KN8;F2Z4K0;F2Z4C1;A0A452DIK7;A0A3Q1LUJ2;Q2HJ86;F6RP72;A0A3Q1M1Z2;A0A452DIH7;P81948;F1MNF8;A0A3Q1LQR2;Q2HJB8		Cytosolic		50.151	451	2624500	2944900		1159400	1178900		16	0	12.79	By MS/MS	By MS/MS		By MS/MS	By MS/MS
P31976;A0A3Q1LVC7	EZR	Cytoskeletal		68.759	581	15250000	9604400	3275500	3163500	7351000		2	0	11.673	By MS/MS	By MS/MS	By MS/MS	By MS/MS	By MS/MS
Q2KIK0;A0A452DHZ1;A0A3Q1LWL8	SUGT1	Nuclear		38.074	338	7218300	2611600	2105800	2000500	2795700		3	0	12.755	By MS/MS	By MS/MS	By MS/MS	By MS/MS	By MS/MS
A0A3Q1MUA3;F1MUC5;A0A3Q1M4P8;A0A3Q1LXM2;A0A3Q1M0N0	COL15A1	Core Matrisome	Collagens	137.51	1350	13042000	1745100	1819700	6854200	7666900		5	0	91.108	By MS/MS	By MS/MS	By MS/MS	By MS/MS	By MS/MS
A0A3Q1MA31;A0A3Q1LZ09;Q3T052;F1MMD7;CON__Q3T052;A0A3Q1MGQ6	ITIH4	Matrisome Associated	ECM Regulators	99.645	899	227410000	195980000	34933000	125410000	156510000	10587000	6	0	137.22	By MS/MS	By MS/MS	By MS/MS	By MS/MS	By MS/MS	By MS/MS
A0A3Q1NA44;A0A3Q1LZN8;P02465	COL1A2	Core Matrisome	Collagens	118.06	1248	72354000	45434000	44244000	46321000	46584000	12584000	3	0	233.51	By MS/MS	By MS/MS	By MS/MS	By MS/MS	By MS/MS	By MS/MS
A0A3Q1MU17;A0A3Q1MC97;A0A3Q1M685;Q3T074;A0A3Q1M3B5	ART3	Membrane		40.948	358	2657300	1554500		13703000	6887000		5	0	25.056	By MS/MS	By MS/MS		By MS/MS	By MS/MS
F1MMR6;A0A3Q1M3Z5;P80209	CTSD	Matrisome Associated	ECM Regulators	44.704	412	29969000	45110000	106260000	12065000	36877000	141730	3	0	91.472	By MS/MS	By MS/MS	By MS/MS	By MS/MS	By MS/MS	By matching
A0A3Q1M4L6;F2Z4F9;G3N080;Q32S29;Q2M2T1;Q32L48;P62808;A0A3Q1MEU7;A0A452DJK3;F2Z4E8;Q2KII5;A0A3Q1MBN5;G3MWH4;G5E6I9;G8JL06;G3N1R5;G3MZR4;E1BPK0;A0A3Q1M071;G3N011;E1B7N8;E1BM22;G3N3L9;G3N0L9;E1B8G9;E1BDE9;G3N0M9;G3MXG7;F1MUU9;G3MXG1;A0A3Q1MQN3;A6QQ28	H2BC14	Nuclear		17.089	154	58333000	53155000	11340000	20045000	26401000		32	0	12.89	By MS/MS	By MS/MS	By MS/MS	By MS/MS	By MS/MS
Q5E9F8;P84227;P68432;G3N2P2;G3MYD7;G3MWX6;E1BGN3;A5PK61;A0A3Q1MPB8;A0A3Q1M588;A0A3Q1LMR9;Q3SZB8	H3-3A	Nuclear		15.328	136				12307000	12968000	85223000	12	0	12.248			By MS/MS	By MS/MS	By MS/MS	By MS/MS
A0A3Q1M6C2;O18963;G3X7D6	CYP2E1	Membrane		52.997	464	10476000		13338000				3	0	13.21	By MS/MS		By matching	By MS/MS	By MS/MS
F1N7F3;A0A3Q1M731;A0A3Q1MHB0	EGFR	Nuclear		130.86	1179	1705100	1007400	333920	1291600	1506300		3	0	20.183	By MS/MS	By MS/MS	By MS/MS	By MS/MS	By MS/MS
A0A3Q1M858;G3MWX7	LOC100295548	Cytosolic		19.568	180	2064600		949790	1374700	1532400		2	0	12.948	By MS/MS		By MS/MS	By MS/MS	By MS/MS
Q2TBU0;A0A3Q1MB98;G3X6K8	HP	Cytosolic		44.859	401	17466000	27081000	23947000	7477200	9688200	4427200	3	0	24.986	By MS/MS	By MS/MS	By MS/MS	By MS/MS	By MS/MS	By MS/MS
E1B748;A0A3Q1MBP1;A0A3Q1M930;A0A3Q1MJM1	HYOU1	Cytosolic		111.38	1000	46669000	35924000	14695000	22873000	45834000		4	0	65.931	By MS/MS	By MS/MS	By MS/MS	By MS/MS	By MS/MS
Q05927;A0A3Q1MCG3	NT5E	Membrane		62.965	574	1410400		396570	248220	354600		2	0	11.923	By MS/MS		By MS/MS	By MS/MS	By MS/MS
G3X807;P62803;A0A3Q1MEZ8;E1B9M9;A0A3Q1LMV7;G3MYX0;E1B7N2	H4C9	Nuclear		10.949	98	61529000	53563000	18425000	61785000	69368000	20840000	7	0	43.827	By MS/MS	By MS/MS	By MS/MS	By MS/MS	By MS/MS	By MS/MS
F1MX83;A0A3Q1MFC3	S100A11	Matrisome Associated	Secreted Factors	13.724	126	6397000	6752900					2	0	12.114	By MS/MS	By MS/MS				By MS/MS
A0A3Q1MFH5;E1BC55	KIAA1671	Cytosolic		188.86	1755		40249000	19178000	16036000	65951000		2	0	12.202		By MS/MS	By MS/MS	By MS/MS	By MS/MS
A0A3Q1MFJ3;Q2KJ32;A0A3Q1N308	SELENBP1	Nuclear		49.252	441	2025300	2044200	206690				3	0	13.242	By MS/MS	By MS/MS	By matching
P00978;CON__P00978;F1MMK9;A0A3Q1MGB8	AMBP	Matrisome Associated	ECM Regulators	39.234	352	27781000	17530000	32147000	30616000	29540000	372170	4	0	19.862	By MS/MS	By MS/MS	By MS/MS	By MS/MS	By MS/MS	By MS/MS
O02853;A0A3Q1MGM5	PTGDS	Nuclear		21.229	191	437770000	347670000	226620000	180490000	232910000	24624000	2	0	87.219	By MS/MS	By MS/MS	By MS/MS	By MS/MS	By MS/MS	By MS/MS
P13214;A0A3Q1MHG7	ANXA4	Matrisome Associated	ECM-affiliated Proteins	35.888	319	5700800	3765600	1814700	5500100	7758000	5849000	2	0	25.465	By MS/MS	By MS/MS	By MS/MS	By MS/MS	By MS/MS	By MS/MS
A0A3Q1MHT0;F1MCK2;A0A3Q1NE82	AHNAK	Cytoskeletal		605.14	5675	117000000	100940000	42139000	67482000	75792000		3	0	179.36	By MS/MS	By MS/MS	By MS/MS	By MS/MS	By MS/MS
A0A3Q1MI13;F6PWM7	AIMP1	Nuclear		33.808	306	2176300		2408900	1388500	743000		2	0	11.632	By MS/MS		By MS/MS	By MS/MS	By MS/MS
Q3SX14;F1MJH1;A0A3Q1MIW2;CON__Q3SX14;A0A3Q1MIS1;F1N1I6	GSN	Cytoskeletal		80.73	731	811720	2227700	351630	1104500	1770900		6	0	27.082	By MS/MS	By MS/MS	By MS/MS	By MS/MS	By MS/MS
A0A3Q1MJD9;Q3SWX7;F1MWQ2;A0A3Q1LT59	ANXA3	Matrisome Associated	ECM-affiliated Proteins	35.651	319	19173000	26087000	2081800	5097800	5788200	191570	4	0	52.978	By MS/MS	By MS/MS	By MS/MS	By MS/MS	By MS/MS	By matching
O02739;A0A3Q1MJK1;F1N0T3;A0A3Q1NAJ0;A0A3Q1LKH6;G3X7H8;A6QPW6	SERPINB6	Matrisome Associated	ECM Regulators	42.56	378	174240000	104790000	148210000	65903000	78579000	18999000	7	0	213.04	By MS/MS	By MS/MS	By MS/MS	By MS/MS	By MS/MS	By MS/MS
Q2KJF1;CON__Q2KJF1;A0A3Q1MJT2	A1BG	Cytosolic		53.553	503	67605000	52253000	20680000	18382000	31686000	262390	3	0	145.24	By MS/MS	By MS/MS	By MS/MS	By MS/MS	By MS/MS	By MS/MS
A0A3Q1MK89;E1BCF0	PIBF1	Cytoskeletal		88.431	747	363140000	260600000	2625600	6746300	4044200		2	0	11.343	By MS/MS	By MS/MS	By MS/MS	By MS/MS	By MS/MS
A0A3Q1MLR0;Q5EA64;F1N103	COCH	Core Matrisome	ECM Glycoproteins	57.014	527	1089100	936380		669000	1127000		3	0	13.975	By MS/MS	By MS/MS		By MS/MS	By MS/MS
Q9TTJ5;A0A3Q1MLX2	RGN	Nuclear		33.307	299	628200000	354080000	275250000	341820000	240320000	4413100	2	0	53.937	By MS/MS	By MS/MS	By MS/MS	By MS/MS	By MS/MS	By MS/MS
Q28178;F1N3A1;CON__Q28194;A0A3Q1MQV3	THBS1	Core Matrisome	ECM Glycoproteins	129.53	1170	4095900	2837700	4526700	2282900	790460		4	0	25.504	By MS/MS	By MS/MS	By MS/MS	By MS/MS	By MS/MS
F1MSZ6;P41361;CON__P41361;A0A3Q1MS55;A0A3Q1NJR8	SERPINC1	Matrisome Associated	ECM Regulators	48.856	429	14926000	13372000	2228900	12838000	19185000	408770	5	0	28.621	By MS/MS	By MS/MS	By MS/MS	By MS/MS	By MS/MS	By matching
Q9XT56;A0A3Q1MSB5	F11R	Membrane		32.455	298				543960	719620	220010	2	0	11.92		By MS/MS		By MS/MS	By MS/MS	By matching
Q3SZJ7;A0A3Q1MTN6;G3MXJ5;A0A3Q1N8P4;A0A3Q1LZC9	LAMP2	Membrane		44.542	407	8309300	6510800	16411000	4732900	6002900		5	0	17.936	By MS/MS	By MS/MS	By MS/MS	By MS/MS	By MS/MS
P01888;A0A3Q1MU93	B2M	Cytosolic		13.677	118	22255000	20703000	15814000	12324000	24226000		2	0	24.654	By MS/MS	By MS/MS	By MS/MS	By MS/MS	By MS/MS
F1MJM4;A6QQ07;A0A3Q1MUX4	BTD	Cytosolic		58.31	525	8114600	5140200	678320	2863700	4232900		3	0	78.473	By MS/MS	By MS/MS	By MS/MS	By MS/MS	By MS/MS
Q9XSJ4;F1MB08;A0A3Q1MXQ0;A0A3Q1LGA6;A0A3Q1LMT0;A0A3Q1MIY8;Q3ZC09;A6QR19;A0A452DI31;A0A3Q1M0V5	ENO1	Membrane		47.326	434	5551800	7596500	1752200	1218700	1089300		10	0	42.654	By MS/MS	By MS/MS	By MS/MS	By MS/MS	By MS/MS
Q2KIY5;F1MIH9;A0A3Q1N1J5	PLBD2	Cytosolic		65.692	589	169920000	145460000	23208000	47150000	36855000	491220	3	0	21.299	By MS/MS	By MS/MS	By MS/MS	By MS/MS	By MS/MS	By MS/MS
A0A3Q1N3I9;G3N0V0		Cytosolic		35.256	320	222550000	200830000	138040000	164570000	196560000	10396000	2	0	133.35	By MS/MS	By MS/MS	By MS/MS	By MS/MS	By MS/MS	By MS/MS
P13213;A0A3Q1N541	SPARC	Core Matrisome	ECM Glycoproteins	34.613	303	3574200	2368500		6390800	5018900		2	0	12.466	By MS/MS	By MS/MS		By MS/MS	By MS/MS
A0A3Q1N6D1;Q865V6;A0A3Q1MDS0	CAPG	Cytoskeletal		40.647	363	14706000	15215000	87566	602640	2877100		3	0	25.429	By MS/MS	By MS/MS	By matching	By MS/MS	By MS/MS
Q3T0K1;F1N3H1;A0A3Q1NC75	CALU	Membrane		37.082	315	4765800	3940900		3762700	5594700		3	0	12.051	By MS/MS	By MS/MS		By MS/MS	By MS/MS
A0A3Q1NJ03;CON__ENSEMBL:ENSBTAP00000013050;A5PJ69	SERPINA10	Matrisome Associated	ECM Regulators	47.19	409	6452600	5617100	912770	841940	3522100		3	0	12.288	By MS/MS	By MS/MS	By MS/MS	By MS/MS	By MS/MS
A0A452DHZ5;Q0P569	NUCB1	Nuclear		53.28	457	1876200	1311300	224510	2057500	2416900	484870	2	0	18.886	By MS/MS	By MS/MS	By matching	By MS/MS	By MS/MS	By matching
A0A452DI46;Q29451	MAN2B1	Cytosolic		110.78	982	13286000	13998000	6978500	4735800	6883400		2	0	23.685	By MS/MS	By MS/MS	By MS/MS	By MS/MS	By MS/MS
P00829;A0A452DII8	ATP5F1B	Cytosolic		56.283	528	1189100	959100	584400	4361800	5494600	125860	2	0	32.503	By MS/MS	By MS/MS	By MS/MS	By MS/MS	By MS/MS	By matching
A0A452DJ82;P19803;G3MW01	ARHGDIA	Nuclear		32.797	299	8880000	7273700	3078200	1708800	2796200	204750	3	0	18.47	By MS/MS	By MS/MS	By MS/MS	By MS/MS	By MS/MS	By MS/MS
Q9TTE1;CON__Q9TTE1;A2I7M9;A0A452DJK6;A0A0A0MP88;A0A3Q1N535;A6QPQ2	SERPINA3-1	Matrisome Associated	ECM Regulators	46.236	411	266910000	202080000	11514000	151290000	201550000	50436000	7	0	66.324	By MS/MS	By MS/MS	By MS/MS	By MS/MS	By MS/MS	By MS/MS
A1A4L7	GSTM4	Cytosolic		25.669	218	8200600	11067000	1725900	238770	101740		1	0	21.927	By MS/MS	By MS/MS	By MS/MS	By MS/MS	By matching
A5D7D1;A0A3Q1MRU0;A0A3Q1MFS2;A0A3Q1MR52;A0A3Q1MBS5;Q3B7N2;A0A452DIE5;A0A3Q1MPS4;A0A3Q1MAJ8;A0A3Q1M6W4;A0A3Q1M2X5;Q3ZC55;A0A3Q1LWS8;Q0III9	ACTN4	Cytoskeletal		104.93	911	5155300	4769200	1694600				14	0	29.389	By MS/MS	By MS/MS	By MS/MS
P38657;A5D7E8	PDIA3	Nuclear		56.929	505	24213000	18909000	8129300	8353500	11341000		2	0	32.462	By MS/MS	By MS/MS	By MS/MS	By MS/MS	By MS/MS
A5D984;Q1JPG7	PKM	Nuclear		57.948	531	6415900	19692000	2442500				2	0	42.321	By MS/MS	By MS/MS	By MS/MS
A6QNW7;CON__ENSEMBL:ENSBTAP00000031360;A0A3Q1MHR7	CD5L	Membrane		50.211	451	7532300	5081800		2684900	4308100		3	0	12.928	By MS/MS	By MS/MS		By matching	By MS/MS
P34933;A7E3Q2	HSPA2	Cytoskeletal		69.739	636	613290000	631360000	176660000	370670000	319940000	2202000	2	0	84.958	By MS/MS	By MS/MS	By MS/MS	By MS/MS	By MS/MS	By MS/MS
A7YWG4	GGH	Cytosolic		35.683	318	11505000	10476000	3069500	1306500	341020		1	0	11.79	By MS/MS	By MS/MS	By MS/MS	By MS/MS	By matching
P34955;CON__P34955	SERPINA1	Matrisome Associated	ECM Regulators	46.103	416	181560000	151770000	75885000	90133000	109390000	1496900	2	0	55.14	By MS/MS	By MS/MS	By MS/MS	By MS/MS	By MS/MS	By MS/MS
P50448;E1BMJ0;CON__P50448		Cytosolic		51.723	468	395460	2243200					3	0	21.535	By MS/MS	By MS/MS
Q05443;CON__Q05443	LUM	Core Matrisome	Proteoglycans	38.756	342	28026000	24466000	10562000				2	0	29.677	By MS/MS	By MS/MS	By MS/MS
E1BB91	COL6A3	Core Matrisome	Collagens	339.58	3132	286810000	329000000	120740000	72963000	113440000	7006900	1	0	323.31	By MS/MS	By MS/MS	By MS/MS	By MS/MS	By MS/MS	By MS/MS
E1BFP1	HEBP2	Cytosolic		23.028	205	8411200	7967500	4052600	5905600	2772500		1	0	30.658	By MS/MS	By MS/MS	By MS/MS	By MS/MS	By MS/MS
E1BFX4;A6QPY4;A0A3Q1LQX3;A0A3Q1LV30	SGSH	Cytosolic		57.249	505	21317000	19558000	6879300	13852000	20162000		4	0	34.827	By MS/MS	By MS/MS	By MS/MS	By MS/MS	By MS/MS
E1BG25	MELTF	Membrane		80.693	739	3887200	5189300	3882500	740700	1370200		1	0	62.967	By MS/MS	By MS/MS	By MS/MS	By MS/MS	By MS/MS
E1BI98	COL6A1	Core Matrisome	Collagens	108.67	1027	8895700	14550000	375130	1966300	2153400		1	0	40.239	By MS/MS	By MS/MS	By MS/MS	By MS/MS	By MS/MS
E1BKT9;A0A3Q1MR22	DSP	Cytoskeletal		332.4	2889		1612800	66182000				2	0	36.914		By matching	By MS/MS			By MS/MS
G3X6J9;E1BLC3;A0A3Q1LRT2;A0A3Q1LKG7	ANKRD26	Cytoskeletal		185.13	1621	13820000		4507700				4	0	11.625	By MS/MS		By MS/MS			By MS/MS
E1BLR9	CPD	Nuclear		152.58	1377	23875000	15396000	5608800	5943900	4247300		1	0	31.981	By MS/MS	By MS/MS	By MS/MS	By MS/MS	By MS/MS
Q2TA14;F1MAU4	PRCP	Cytosolic		56.67	499	40317000	61101000	13551000				2	0	30.578	By MS/MS	By MS/MS	By MS/MS
F1ME65	CKAP4	Cytoskeletal		64.529	589	31422000	21196000	7905100	9768700	8129400		1	0	45.268	By MS/MS	By MS/MS	By MS/MS	By MS/MS	By MS/MS
Q3SZV3;F1MG05	EEF1G	Nuclear		50.377	440	17699000	16169000	9270600	6402300	8375100	1091500	2	0	26.224	By MS/MS	By MS/MS	By MS/MS	By MS/MS	By MS/MS	By matching
F1MGY9	AGA	Cytosolic		36.965	346	322470000	218970000	174220000	162540000	131740000	21598000	1	0	323.31	By MS/MS	By MS/MS	By MS/MS	By MS/MS	By MS/MS	By MS/MS
F1MH40;F1MZ96;CON__Q05B55		Cytosolic		26.334	240	79147000	57987000	29899000	57402000	69372000	2220000	3	0	323.31	By MS/MS	By MS/MS	By MS/MS	By MS/MS	By MS/MS	By MS/MS
P48035;F1MHQ4	FABP4	Nuclear		14.678	132	19892000	10446000	14246000	16222000	14796000		2	0	32.94	By MS/MS	By MS/MS	By MS/MS	By MS/MS	By MS/MS
F1MKG2	COL6A2	Core Matrisome	Collagens	105.18	979	14137000	11812000	3342200				1	0	58.847	By MS/MS	By MS/MS	By MS/MS
F1MLB8;P19483;A0A3Q1LZQ9	ATP5F1A	Cytosolic	0	59.689	553	2781100	4638600	716600				3	0	28.317	By MS/MS	By MS/MS	By MS/MS
F1MLW8;A0A3Q1LT19	LOC100847119	Cytosolic	0	24.623	233	54604000	51287000	18485000	38390000	43840000		2	0	21.995	By MS/MS	By MS/MS	By MS/MS	By MS/MS	By MS/MS	By matching
F1MQ37;A0A3Q1LWN6;A0A3Q1MG42;F1MYM9;A6QLN6;F1MM57	MYH9	Cytoskeletal	0	227.2	1965	5757600	6288700	1203600	4918900	6226500		6	0	107	By MS/MS	By MS/MS	By MS/MS	By MS/MS	By MS/MS
Q32S24;F1MRP6	COL11A2	Core Matrisome	Collagens	172.24	1736	1301400	3667900	1049100	4125400	4881100		2	0	34.737	By matching	By MS/MS	By MS/MS	By MS/MS	By MS/MS
F1MTV1;F1MZM9	SPAM1	Matrisome Associated	ECM Regulators	62.28	553	266530000	253260000	123630000	80926000	118590000	7589500	2	0	199.93	By MS/MS	By MS/MS	By MS/MS	By MS/MS	By MS/MS	By MS/MS
F1MXX6;Q95114;G3MYW7	MFGE8	Core Matrisome	ECM Glycoproteins	47.846	431	41854000	29374000	18509000	21162000	18541000	1306700	3	0	54.113	By MS/MS	By MS/MS	By MS/MS	By MS/MS	By MS/MS	By MS/MS
Q1LZH9;F1MXZ0	GNS	Cytosolic	0	62.775	560	190450000	184740000	65394000	77669000	107090000	1966700	2	0	83.779	By MS/MS	By MS/MS	By MS/MS	By MS/MS	By MS/MS	By MS/MS
F1MY84	CSPG4	Matrisome Associated	ECM-affiliated Proteins	250.53	2319	3672900	3618300	2137600	370240	484880		1	0	18.403	By MS/MS	By MS/MS	By matching	By MS/MS	By MS/MS
F1MYG5	LMNA	Cytoskeletal	0	74.126	664	211380000	153890000	49747000	57953000	88903000	878580	1	0	201.49	By MS/MS	By MS/MS	By MS/MS	By MS/MS	By MS/MS	By MS/MS
F1N0F2	SIAE	Cytosolic	0	59.672	533	561850000	475040000	130020000	209040000	252880000	17513000	1	0	323.31	By MS/MS	By MS/MS	By MS/MS	By MS/MS	By MS/MS	By MS/MS
F1N0K0;Q28083	COL11A1	Core Matrisome	Collagens	182.41	1817	35096000	40809000	21811000	21874000	38141000	242150	2	0	255.27	By MS/MS	By MS/MS	By MS/MS	By MS/MS	By MS/MS	By matching
Q2KHZ8;F1N1D5	GBA	Membrane	0	59.854	536	5713200	1253900	1349500				2	0	19.207	By MS/MS	By MS/MS	By MS/MS
F1N269;Q28824	MYLK	Cytoskeletal	0	127.98	1168	7586900	6359000	7849900	92571	6102400		2	0	12.421	By MS/MS	By MS/MS	By MS/MS	By matching	By MS/MS
F1N2L7	CRISP2	Cytosolic	0	27.116	244	556850	725330		2688300	2035900		1	0	12.99	By MS/MS	By MS/MS		By MS/MS	By MS/MS
F1N2Y2;A0A3Q1MUF0;A0A3Q1LL95;A0A3Q1LSX2;A0A3Q1MDT9	COL5A2	Core Matrisome	Collagens	128.38	1294	27999000	30024000	14734000	23846000	36426000		5	0	135.71	By MS/MS	By MS/MS	By MS/MS	By MS/MS	By MS/MS
F1N367;F1N368;P13608	ACAN	Core Matrisome	Proteoglycans	242.73	2328	379850000	267620000	78857000	129830000	177260000	9720100	3	0	161.31	By MS/MS	By MS/MS	By MS/MS	By MS/MS	By MS/MS	By MS/MS
F1N401;P25508	COL12A1	Core Matrisome	Collagens	333	3065	46502000	42052000	23220000	21410000	24305000	421220	2	0	159.79	By MS/MS	By MS/MS	By MS/MS	By MS/MS	By MS/MS	By MS/MS
Q3ZCJ8;F1N455	CTSC	Matrisome Associated	ECM Regulators	51.948	463	2862800	2793000	124010	10610000	10208000		2	0	23.519	By MS/MS	By MS/MS	By matching	By MS/MS	By MS/MS
F1N5W4	ENPP5	Membrane	0	54.281	477	208790000	169280000	19945000	60103000	78172000	2043700	1	0	277.58	By MS/MS	By MS/MS	By MS/MS	By MS/MS	By MS/MS	By MS/MS
P46193;F1N650	ANXA1	Matrisome Associated	ECM-affiliated Proteins	38.951	346	80061000	90472000	16236000	35760000	54967000	506140	2	0	126.9	By MS/MS	By MS/MS	By MS/MS	By MS/MS	By MS/MS	By matching
F6QH94;A0A3Q1MRD2	PDIA6	Membrane	0	48.141	440	14849000	2477300	2481700	4687700	4129500		2	0	45.597	By MS/MS	By MS/MS	By MS/MS	By MS/MS	By MS/MS
F6R4N7	SOD3	Nuclear	0	27.39	252	29164000	29302000	6587400	11827000	21706000		1	0	17.654	By MS/MS	By MS/MS	By MS/MS	By MS/MS	By MS/MS
G3MZI7	COL5A1	Core Matrisome	Collagens	184.86	1847	5897800	4809100	1515600	3141100	3810900		1	0	15.335	By MS/MS	By MS/MS	By MS/MS	By MS/MS	By MS/MS
G3N2L2	RCN1	Cytosolic	0	38.82	331	21104000	19314000	4252900	2346600	3780600	74571	1	0	31.245	By MS/MS	By MS/MS	By MS/MS	By MS/MS	By MS/MS	By matching
G3X6L8	NIPSNAP3A	Cytosolic	0	28.523	247	9545100	8883700	1109200	903730	497550		1	0	19.015	By MS/MS	By MS/MS	By MS/MS	By MS/MS	By MS/MS
G5E507;Q76LV1;A0A3Q1MBX2;Q76LV2;A0A452DI85;G3N2V5	HSP90AB1	Nuclear	0	81.722	712	2816400	6014300	7489900				6	0	12.926	By MS/MS	By MS/MS	By matching
G5E5A8;A0A3Q1M4K6;A0A3Q1NHX9;P07589;G5E5B0;G5E5A9	FN1	Core Matrisome	ECM Glycoproteins	275.55	2510	46427000	36768000	11951000	19144000	21121000	211880	6	0	178.02	By MS/MS	By MS/MS	By MS/MS	By MS/MS	By MS/MS	By matching
G5E5C8;Q2TBL6	TALDO1	Nuclear	0	37.681	337	682070000	602010000	170980000	142800000	539660000	1048300	2	0	323.31	By MS/MS	By MS/MS	By MS/MS	By MS/MS	By MS/MS	By MS/MS
O46375;A0A3Q1MRM2	TTR	Cytosolic	0	15.727	147	535520000	623900000	303190000	747840000	947440000	81195000	2	0	323.31	By MS/MS	By MS/MS	By MS/MS	By MS/MS	By MS/MS	By MS/MS
O97680	TXN	Cytosolic	0	11.812	105	779720000	621590000	403550000	328770000	657160000	2835600	1	0	226.71	By MS/MS	By MS/MS	By MS/MS	By MS/MS	By MS/MS	By MS/MS
P00442;F1MNQ4	SOD1	Nuclear	0	15.682	152	1332200000	1045800000	954990000	984340000	1192800000	78541000	2	0	323.31	By MS/MS	By MS/MS	By MS/MS	By MS/MS	By MS/MS	By MS/MS
P00921;F1N0H3;A0A3Q1MM44	CA2	Cytosolic	0	29.113	260	50401000	26141000	6089100	1357700	15984000	1358700	3	0	38.162	By MS/MS	By MS/MS	By MS/MS	By MS/MS	By MS/MS	By MS/MS
P01017;Q3SZH5;CON__Q3SZH5	AGT	Matrisome Associated	ECM Regulators	51.424	476	5223200	4267600	663160	530390	975520	96456	3	0	38.922	By MS/MS	By MS/MS	By MS/MS	By MS/MS	By MS/MS	By matching
P02453	COL1A1	Core Matrisome	Collagens	138.94	1463	153090000	111820000	154630000	112060000	122940000	69085000	1	0	323.31	By MS/MS	By MS/MS	By MS/MS	By MS/MS	By MS/MS	By MS/MS
P02459	COL2A1	Core Matrisome	Collagens	141.83	1487	518850000	522190000	313470000	247880000	317680000	291170	1	0	323.31	By MS/MS	By MS/MS	By MS/MS	By MS/MS	By MS/MS	By matching
P04272	ANXA2	Matrisome Associated	ECM-affiliated Proteins	38.612	339	400050000	486070000	204740000	112820000	139410000	37612000	1	0	323.31	By MS/MS	By MS/MS	By MS/MS	By MS/MS	By MS/MS	By MS/MS
P07107;A0A3Q1M8I0	DBI	Nuclear	0	10.044	87	122950000	98535000	54995000	110700000	138840000	1574500	2	0	33.399	By MS/MS	By MS/MS	By MS/MS	By MS/MS	By MS/MS	By MS/MS
P63048;P62992;P0CG53;P0CH28;A0A3Q1M4K3;A0A3Q1MYD8;A0A3Q1LU30	UBA52	Nuclear	0	14.728	128	797300000	619710000	295020000	458060000	603170000	16762000	7	0	323.31	By MS/MS	By MS/MS	By MS/MS	By MS/MS	By MS/MS	By MS/MS
P10790	FABP3	Cytosolic	0	14.779	133	41858000	35461000	7001100	10947000	20002000		1	0	46.962	By MS/MS	By MS/MS	By MS/MS	By MS/MS	By MS/MS
P13696;A0A3Q1LX99	PEBP1	Cytosolic	0	20.985	187	69406000	68767000	31384000	20197000	25199000	264440	2	0	105.31	By MS/MS	By MS/MS	By MS/MS	By MS/MS	By MS/MS	By MS/MS
P20456	IMPA1	Cytosolic	0	30.055	277	4267300	5780800	3838000	3099000	2875000	275920	1	0	18.757	By MS/MS	By MS/MS	By MS/MS	By MS/MS	By MS/MS	By matching
P21809	BGN	Core Matrisome	Proteoglycans	41.59	369	1247700	1134800	154330	293450	351890		1	0	12.718	By MS/MS	By MS/MS	By matching	By MS/MS	By MS/MS
P22226	CATHL1	Cytosolic	0	17.6	155	11313000	10150000	2471700	8907100	11603000	1071500	1	0	82.605	By MS/MS	By MS/MS	By MS/MS	By MS/MS	By MS/MS	By MS/MS
P24627	LTF	Cytosolic	0	78.056	708	423310000	344700000	77989000	134460000	170700000	13481000	1	0	275.02	By MS/MS	By MS/MS	By MS/MS	By MS/MS	By MS/MS	By MS/MS
P25326	CTSS	Matrisome Associated	ECM Regulators	37.176	331	5766300	5179200	3297400	2990400	5638600		1	0	14.824	By MS/MS	By MS/MS	By MS/MS	By MS/MS	By MS/MS
P25417	CSTB	Matrisome Associated	ECM Regulators	11.139	98	421790000	254360000	59631000	250740000	214600000		1	0	34.483	By MS/MS	By MS/MS	By MS/MS	By MS/MS	By MS/MS
P33097	GOT1	Cytosolic	0	46.398	413	104150000	68374000	20001000	31664000	52766000	5848200	1	0	98.559	By MS/MS	By MS/MS	By MS/MS	By MS/MS	By MS/MS	By MS/MS
P35466	S100A4	Matrisome Associated	Secreted Factors	11.807	101	43953000	29641000	9239100	7625600	10412000		1	0	19.652	By MS/MS	By MS/MS	By MS/MS	By MS/MS	By MS/MS
P41500	ACYP1	Cytosolic	0	11.432	101	397870000	283430000	94527000	104620000	142080000	1112000	1	0	151.35	By MS/MS	By MS/MS	By MS/MS	By MS/MS	By MS/MS	By MS/MS
P42899;F1MH76	RPLP2	Cytosolic	0	11.702	115	3970000	5596400		2058900	4019100		2	0	17.858	By MS/MS	By MS/MS	By MS/MS	By MS/MS	By MS/MS
P48616;O62654;A6QQJ3;A0A3Q1MVU3;Q28115;A0A3Q1MHT3	VIM	Cytoskeletal	0	53.727	466	328050000	244100000	182550000	140980000	179850000	5471300	6	0	323.31	By MS/MS	By MS/MS	By MS/MS	By MS/MS	By MS/MS	By MS/MS
P52175;P52174	NME1-2	Cytosolic	0	17.298	152	15350000	12275000	6453300	2099700	3317000	7701800	2	0	21.331	By MS/MS	By MS/MS	By MS/MS	By MS/MS	By MS/MS	By MS/MS
P55052	FABP5	Nuclear	0	15.074	135	176790000	144320000	46757000	21245000	28610000	1898900	1	0	60.898	By MS/MS	By MS/MS	By MS/MS	By MS/MS	By MS/MS	By MS/MS
P55252;A8E4P9	HAPLN1	Core Matrisome	Proteoglycans	40.287	354	112380000	90549000	74673000	88410000	106390000	1720800	2	0	143.04	By MS/MS	By MS/MS	By MS/MS	By MS/MS	By MS/MS	By MS/MS
P63258;P60712;A0A452DJE4;G8JKX4;Q5E9B5;Q3ZC07;P68138;P62739;A0A3Q1M558;A0A3Q1NKP5	ACTG1	Cytoskeletal	0	41.792	375	81057000	96870000	27169000	15867000	14461000	1351600	10	0	42.726	By MS/MS	By MS/MS	By MS/MS	By MS/MS	By MS/MS	By MS/MS
P79345	NPC2	Cytosolic	0	16.64	149	2798900	1209200	236460	1664400	2675500		1	0	15.794	By MS/MS	By MS/MS	By MS/MS	By MS/MS	By MS/MS
P80513	MANF	Cytosolic	0	20.356	179	5179900	4352700	1426100	740660	1299700		1	0	15.09	By MS/MS	By MS/MS	By MS/MS	By MS/MS	By MS/MS
P80724	BASP1	Nuclear	0	23.01	227	9415500	6061200	2621400	3368500	7432800		1	0	28.348	By MS/MS	By MS/MS	By MS/MS	By MS/MS	By MS/MS
P81287;A0A3Q1MU33;F6QVC9	ANXA5	Matrisome Associated	ECM-affiliated Proteins	36.088	321	76045000	99519000	8036500	10480000	12300000	223000	3	0	81.985	By MS/MS	By MS/MS	By MS/MS	By MS/MS	By MS/MS	By MS/MS
Q05204	LAMP1	Membrane	0	44.152	409	17292000	17516000	447010	5653100	2673200		1	0	29.612	By MS/MS	By MS/MS	By MS/MS	By MS/MS	By MS/MS
Q0VCU3	CTSF	Matrisome Associated	ECM Regulators	50.893	460	7690500	6893300	3250600	1987000	2840200		1	0	17.373	By MS/MS	By MS/MS	By MS/MS	By MS/MS	By MS/MS
Q0VCX2	HSPA5	Nuclear	0	72.399	655	864980000	693200000	366350000	402240000	478200000	17271000	1	0	323.31	By MS/MS	By MS/MS	By MS/MS	By MS/MS	By MS/MS	By MS/MS
Q0VD04;A0A3Q1MSS8;A0A3Q1M0W3	KRT85	Cytoskeletal	0	55.895	507				579120		178200000	3	0	43.512				By matching	By matching	By MS/MS
Q17QG2	NUDC	Cytoskeletal	0	38.242	332	69999000	49299000	30248000	21505000	34755000	2850600	1	0	22.827	By MS/MS	By MS/MS	By MS/MS	By MS/MS	By MS/MS	By MS/MS
Q27975;Q27965	HSPA1A	Cytoskeletal	0	70.258	641	38274000	27501000	17602000	21602000	18022000		2	0	26.814	By MS/MS	By MS/MS	By MS/MS	By MS/MS	By MS/MS
Q2HJ49	MSN	Cytoskeletal	0	67.974	577	1905500	1152900	826140	4882000	4587600		1	0	17.568	By MS/MS	By MS/MS	By matching	By MS/MS	By MS/MS
Q2HJ57	COTL1	Cytoskeletal	0	16.01	142	4161000	4534300		6993500	10583000		1	0	23.458	By MS/MS	By MS/MS		By MS/MS	By MS/MS
Q2KJH6	SERPINH1	Matrisome Associated	ECM Regulators	46.506	418	813010	2335800	681440				1	0	15.523	By MS/MS	By MS/MS	By MS/MS
Q2KJJ8	PLD3	Membrane	0	54.619	490	55879000	50687000	18014000	13228000	17987000		1	0	23.296	By MS/MS	By MS/MS	By MS/MS	By MS/MS	By MS/MS
Q32LE4	GGCT	Cytosolic	0	21.177	188	64767000	77767000	17952000	12281000	17639000		1	0	44.121	By MS/MS	By MS/MS	By MS/MS	By MS/MS	By MS/MS
Q3SZC4	NSFL1C	Cytoskeletal	0	40.653	370	866360	2381100					1	0	11.786	By MS/MS	By MS/MS
Q3SZV7;A0A452DI25;CON__Q3SZV7;A0A3Q1N2E0	HPX	Matrisome Associated	ECM-affiliated Proteins	52.209	459	43208000	32649000	4018200	16597000	11139000	878520	4	0	81.72	By MS/MS	By MS/MS	By MS/MS	By MS/MS	By MS/MS	By MS/MS
Q3T114;A0A3Q1MM98	RIDA	Nuclear	0	14.272	137	68450000	80250000	34439000	25398000	40357000	4630500	2	0	55.17	By MS/MS	By MS/MS	By MS/MS	By MS/MS	By MS/MS	By MS/MS
Q58CQ9;A0A140T891	VNN1	Membrane	0	56.946	510	5674700	5313400	1919600	3550800	4376100	166240	2	0	13.897	By MS/MS	By MS/MS	By MS/MS	By MS/MS	By MS/MS	By matching
Q58DU7	SH3BGRL	Cytosolic	0	12.776	114	6713000	8855900		3029500	1185300		1	0	23.011	By MS/MS	By MS/MS		By MS/MS	By MS/MS
Q5BIR5	SERPINB8	Matrisome Associated	ECM Regulators	42.172	374	3672600	2138200	2009500	1015200	1952800	109840	1	0	14.921	By MS/MS	By MS/MS	By MS/MS	By MS/MS	By MS/MS	By matching
Q5E946	PARK7	Nuclear	0	20.035	189	14508000	14145000	1608300	5763200	8382300	780960	1	0	78.177	By MS/MS	By MS/MS	By MS/MS	By MS/MS	By MS/MS	By matching
Q5E947;A0A3Q1MIR5	PRDX1	Nuclear	0	22.209	199	36114000	45998000	6269600	4977500	4422900	201030	2	0	18.138	By MS/MS	By MS/MS	By MS/MS	By MS/MS	By MS/MS	By matching
Q5E9F5	TAGLN2	Cytosolic	0	22.426	199	2878900	3672500					1	0	11.774	By MS/MS	By MS/MS
Q8WMP9	PLA2G15	Membrane	0	46.061	407	5602200	5110500	2343800				1	0	18.522	By MS/MS	By MS/MS	By MS/MS
Q95L54;A0A3Q1MTA5	ANXA8	Matrisome Associated	ECM-affiliated Proteins	36.787	327	8451500	7478100	549010	792580	1346200		2	0	19.844	By MS/MS	By MS/MS	By matching	By MS/MS	By MS/MS
Q95M18	HSP90B1	Cytosolic	0	92.426	804	3450900	3064300	828270	293290	262750		1	0	23.715	By MS/MS	By MS/MS	By matching	By MS/MS	By MS/MS
Q9N0V4;F6Q751;E1BH17;A0A3Q1LFR2;A0A3Q1LY34;A0A3Q1MQV0;A0A3Q1NG91;A0A3Q1MJD4	GSTM1	Cytosolic	0	25.635	218	415000000	411980000	227850000	108880000	123100000	8975800	8	0	240.78	By MS/MS	By MS/MS	By MS/MS	By MS/MS	By MS/MS	By MS/MS

## Sheet: Data Analyses
	ECM PROTEINS
				Aha			Met			log2(Fold Change (Aha/Met))
	Lead Gene Name	Cellular Compartment	Matrisome Classification	Biological Rep. 1	Biological Rep. 2	Biological Rep. 3	Biological Rep. 1	Biological Rep. 2	Biological Rep. 3	Biological Rep. 1	Biological Rep. 2	Biological Rep. 3	Newly Synthesized Protein?
	KNG1	Matrisome Associated	ECM Regulators	27770000	18633000	1931500	6971300	13532000	85774	1.99403	0.461485	4.49304	Yes
	SERPINA5	Matrisome Associated	ECM Regulators	2725100	2574500	435810	908760	1015500		1.58434	1.3421		Yes
	GC	Matrisome Associated	Secreted Factors	6915500	6765700	2003000	1390400	2077100		2.31433	1.70367		Yes
	CTSD	Matrisome Associated	ECM Regulators	29969000	45110000	106260000	12065000	36877000	141730	1.31264	0.290726	9.55024	Yes
	S100A11	Matrisome Associated	Secreted Factors	6397000	6752900								Yes
	ANXA3	Matrisome Associated	ECM-affiliated Proteins	19173000	26087000	2081800	5097800	5788200	191570	1.91113	2.17214	3.44189	Yes
	SERPINB6	Matrisome Associated	ECM Regulators	174240000	104790000	148210000	65903000	78579000	18999000	1.40266	0.415285	2.96365	Yes
	SERPINA1	Matrisome Associated	ECM Regulators	181560000	151770000	75885000	90133000	109390000	1496900	1.01032	0.472406	5.66376	Yes
	LUM	Core Matrisome	Proteoglycans	28026000	24466000	10562000							Yes
	COL6A3	Core Matrisome	Collagens	286810000	329000000	120740000	72963000	113440000	7006900	1.97486	1.53616	4.10698	Yes
	COL6A1	Core Matrisome	Collagens	8895700	14550000	375130	1966300	2153400		2.17762	2.75633		Yes
	COL6A2	Core Matrisome	Collagens	14137000	11812000	3342200							Yes
	SPAM1	Matrisome Associated	ECM Regulators	266530000	253260000	123630000	80926000	118590000	7589500	1.71962	1.09464	4.02588	Yes
	CSPG4	Matrisome Associated	ECM-affiliated Proteins	3672900	3618300	2137600	370240	484880		3.31039	2.89961		Yes
	ACAN	Core Matrisome	Proteoglycans	379850000	267620000	78857000	129830000	177260000	9720100	1.54881	0.594319	3.0202	Yes
	COL12A1	Core Matrisome	Collagens	46502000	42052000	23220000	21410000	24305000	421220	1.11901	0.790921	5.78465	Yes
	ANXA1	Matrisome Associated	ECM-affiliated Proteins	80061000	90472000	16236000	35760000	54967000	506140	1.16275	0.718906	5.00352	Yes
	FN1	Core Matrisome	ECM Glycoproteins	46427000	36768000	11951000	19144000	21121000	211880	1.27807	0.799773	5.81774	Yes
	AGT	Matrisome Associated	ECM Regulators	5223200	4267600	663160	530390	975520	96456	3.29981	2.12918	2.78141	Yes
	COL2A1	Core Matrisome	Collagens	518850000	522190000	313470000	247880000	317680000	291170	1.06568	0.717001	10.0722	Yes
	ANXA2	Matrisome Associated	ECM-affiliated Proteins	400050000	486070000	204740000	112820000	139410000	37612000	1.82616	1.80183	2.44453	Yes
	BGN	Core Matrisome	Proteoglycans	1247700	1134800	154330	293450	351890		2.08808	1.68924		Yes
	S100A4	Matrisome Associated	Secreted Factors	43953000	29641000	9239100	7625600	10412000		2.52704	1.50935		Yes
	ANXA5	Matrisome Associated	ECM-affiliated Proteins	76045000	99519000	8036500	10480000	12300000	223000	2.85921	3.01631	5.17145	Yes
	CTSF	Matrisome Associated	ECM Regulators	7690500	6893300	3250600	1987000	2840200		1.95249	1.2792		Yes
	SERPINH1	Matrisome Associated	ECM Regulators	813010	2335800	681440							Yes
	HPX	Matrisome Associated	ECM-affiliated Proteins	43208000	32649000	4018200	16597000	11139000	878520	1.38038	1.55142	2.1934	Yes
	SERPINB8	Matrisome Associated	ECM Regulators	3672600	2138200	2009500	1015200	1952800	109840	1.85504	0.130853	4.19336	Yes
	ANXA8	Matrisome Associated	ECM-affiliated Proteins	8451500	7478100	549010	792580	1346200		3.41458	2.47378		Yes
	CD109	Matrisome Associated	ECM Regulators	6464600	4874700	1902200	4765800	5274600		0.439843	-0.113748
	TNC	Core Matrisome	ECM Glycoproteins	61350000	53527000	16242000	37095000	50450000	648300	0.725839	0.0854125	4.64692
	SERPINB1	Matrisome Associated	ECM Regulators	72650000	43342000	18316000	38736000	49990000	2826000	0.907288	-0.205874	2.69627
	ORM1	Matrisome Associated	Secreted Factors	49050000	38124000	28461000	43126000	62278000		0.185695	-0.708023
	LAMA1	Core Matrisome	ECM Glycoproteins	2906800	2721500		2007900	2069700		0.533744	0.39498
	COL15A1	Core Matrisome	Collagens	13042000	1745100	1819700	6854200	7666900		0.928105	-2.13533
	ITIH4	Matrisome Associated	ECM Regulators	227410000	195980000	34933000	125410000	156510000	10587000	0.858643	0.324452	1.7223
	COL1A2	Core Matrisome	Collagens	72354000	45434000	44244000	46321000	46584000	12584000	0.643406	-0.0360622	1.81389
	AMBP	Matrisome Associated	ECM Regulators	27781000	17530000	32147000	30616000	29540000	372170	-0.140187	-0.752844	6.43258
	ANXA4	Matrisome Associated	ECM-affiliated Proteins	5700800	3765600	1814700	5500100	7758000	5849000	0.0517065	-1.04281	-1.68846
	COCH	Core Matrisome	ECM Glycoproteins	1089100	936380		669000	1127000		0.703058	-0.267321
	THBS1	Core Matrisome	ECM Glycoproteins	4095900	2837700	4526700	2282900	790460		0.843313	1.84396
	SERPINC1	Matrisome Associated	ECM Regulators	14926000	13372000	2228900	12838000	19185000	408770	0.217407	-0.520764	2.44697
	SPARC	Core Matrisome	ECM Glycoproteins	3574200	2368500		6390800	5018900		-0.838376	-1.0834
	SERPINA10	Matrisome Associated	ECM Regulators	6452600	5617100	912770	841940	3522100		2.93809	0.67339
	SERPINA3-1	Matrisome Associated	ECM Regulators	266910000	202080000	11514000	151290000	201550000	50436000	0.819037	0.00378876	-2.13106
	COL11A2	Core Matrisome	Collagens	1301400	3667900	1049100	4125400	4881100		-1.66447	-0.412252
	MFGE8	Core Matrisome	ECM Glycoproteins	41854000	29374000	18509000	21162000	18541000	1306700	0.98389	0.663821	3.82423
	COL11A1	Core Matrisome	Collagens	35096000	40809000	21811000	21874000	38141000	242150	0.68209	0.0975447	6.49301
	COL5A2	Core Matrisome	Collagens	27999000	30024000	14734000	23846000	36426000		0.231628	-0.278852
	CTSC	Matrisome Associated	ECM Regulators	2862800	2793000	124010	10610000	10208000		-1.88993	-1.86981
	COL5A1	Core Matrisome	Collagens	5897800	4809100	1515600	3141100	3810900		0.908907	0.335635
	COL1A1	Core Matrisome	Collagens	153090000	111820000	154630000	112060000	122940000	69085000	0.450109	-0.136776	1.16238
	CTSS	Matrisome Associated	ECM Regulators	5766300	5179200	3297400	2990400	5638600		0.947307	-0.122608
	CSTB	Matrisome Associated	ECM Regulators	421790000	254360000	59631000	250740000	214600000		0.750333	0.245222
	HAPLN1	Core Matrisome	Proteoglycans	112380000	90549000	74673000	88410000	106390000	1720800	0.346104	-0.232592	5.43944
